# Supplementary material for: Discovery of novel sulfonamide substituted indolylarylsulfones as potent HIV-1 inhibitors with better safety profiles
Source: PubMed Central journal article supplement — Acta Pharm Sin B. 2023 Jan 11;13(6):2747–64. doi: 10.1016/j.apsb.2023.01.003 (PMC10326263; doi:10.1016/j.apsb.2023.01.003), 2023-01-11

## Supporting Information for

### Original article

#### Discovery of novel sulfonamide substituted indolylarylsulfones as potent HIV-1 inhibitors with better safety profiles

Shenghua Gao<sup>a,b,d</sup>, Letian Song<sup>a</sup>, Yusen Cheng<sup>a</sup>, Fabao Zhao<sup>a</sup>, Dongwei Kang<sup>a,b</sup>, Shu Song<sup>a</sup>, Mianling Yang<sup>a</sup>, Bing Ye<sup>a</sup>, Wei Zhao<sup>c</sup>, Yajie Tang<sup>c</sup>, Erik De Clercq<sup>c</sup>, Christophe Pannecouque<sup>c,\*</sup>, Peng Zhan<sup>a,b,\*</sup>, Xinyong Liu<sup>a,b,\*</sup>

<sup>a</sup>*Department of Medicinal Chemistry, Key Laboratory of Chemical Biology, Ministry of Education, School of Pharmaceutical Sciences, Shandong University, Ji'nan 250012, China*

<sup>b</sup>*China-Belgium Collaborative Research Center for Innovative Antiviral Drugs of Shandong Province, Ji'nan 250012, China*

<sup>c</sup>*Rega Institute for Medical Research, K.U.Leuven, Minderbroedersstraat 10, Leuven B-3000, Belgium*

<sup>d</sup>*Shenzhen Research Institute of Shandong University, A301 Virtual University Park in South District of Shenzhen, Shenzhen 518057, China.*

<sup>e</sup>*State Key Laboratory of Microbial Technology, Shandong University, Qingdao 266237, China*

Received 26 October 2022; received in revised form 17 December 2022; accepted 26 December 2022

\*Corresponding authors.

E-mail addresses: christophe.pannecouque@kuleuven.be (Christophe Pannecouque); zhanpeng1982@sdu.edu.cn (Peng Zhan); xinyongl@sdu.edu.cn (Xinyong Liu.).

## Table of Contents

|                                                                                 |            |
|---------------------------------------------------------------------------------|------------|
| <b>Methods.....</b>                                                             | <b>S1</b>  |
| <i>In vivo</i> pharmacokinetics study.....                                      | S1         |
| Acute and subacute toxicity assay procedure.....                                | S2         |
| Molecular docking simulation.....                                               | S2         |
| <b>Table S1. RT inhibitory activity of target compounds.....</b>                | <b>S4</b>  |
| <b><sup>1</sup>H NMR and <sup>13</sup>C NMR spectra of final compounds.....</b> | <b>S5</b>  |
| <b>HRMS spectra of representative final compounds.....</b>                      | <b>S53</b> |
| <b>HPLC trace of representative final compounds.....</b>                        | <b>S71</b> |

### **Animal husbandry conditions**

Animals are group housed during acclimation and study. The animal room environment is controlled (target conditions: temperature 20 °C to 25 °C, relative humidity 40% to 70%, 12 hours' artificial light and 12 hours' dark). In the acute toxicity experiment, subacute toxicity experiment, and PK study, All the animals will be fasted for 12 hours before dosing. The age of Sprague-Dawley rats in PK study is 6-8 weeks, and the body weights range from 180 - 220 g. The age of Kunming mice in acute/subacute toxicity study is 3-4 weeks, and the body weights are about 20 g.

### ***In vivo* pharmacokinetics study**

The **R<sub>10</sub>L<sub>4</sub>** (14.56 mg) was dissolved in a mixture of 0.713 mL DMSO, 1.427 mL polyethylene glycol-15 hydroxystearate (Solutol) and 12.128 mL normal saline for a 1.00 mg/mL solution. Six male Sprague-Dawley rats were randomly divided into two groups to receive intravenous ( $2 \text{ mg} \cdot \text{kg}^{-1}$ ) or oral administration ( $10 \text{ mg} \cdot \text{kg}^{-1}$ ) of a test drug. Blood samples of the intravenous group were collected from the sinus jugularis into heparinized centrifugation tubes at 5 min, 15 min, 30 min, 1 h, 2 h, 4 h, 8 h, and 24 h after dosing, and blood samples of the oral administration group were collected at 15 min, 30 min, 1 h, 2 h, 4 h, 8 h, and 24 h after dosing (250  $\mu\text{L}$  of blood each time). The blood samples were centrifuged at 6000 rpm for 3 min to separate plasma, which was stored at -20 °C for next steps of analysis. Upon LC-MS analysis, plasma samples were thawed, shaken for 30 seconds, and centrifuged at 4000 rpm for 0.5 min under 4°C. The internal standard solution contains 50  $\mu\text{g/L}$  tolbutamide in a 1:1 mixture of MeOH and ACN. Then 40  $\mu\text{L}$  of plasma, calibration standard, quality control and dilution quality control, blank sample were added to the 96-well plate respectively. Each sample was quenched with 200  $\mu\text{L}$  of internal standard respectively (blank sample was quenched with 200  $\mu\text{L}$  of ACN:MeOH = 1:1), and then the mixture was vortex-mixed for 5 min and centrifuged for 5 min at 14000 rpm, 4 °C. Subsequently, 100  $\mu\text{L}$  supernatant was transferred to another clean 96-well plate and diluted with 100  $\mu\text{L}$  of ACN, vortex-mixed for 5 min and centrifuged for 5 min at 800 rpm, 4 °C, then injected for LC-MS/MS analysis. All samples were quantified with an LC-MS/MS-AR Triple Quad 6500+ (SCIEX, USA) and the liquid phase system was ExionLC. The mobile phase was 0.1% formic acid-water/ACN with gradient elute at a

flow rate of 0.8 mL/min (total time 2 min), and the test wavelength was 225 nm. All blood samples were centrifuged in an Eppendorf 5424R centrifuge and quantified with an LC-MS/MS-AR Triple Quad 6500+ (SCIEX, USA). Pharmacokinetic parameters were calculated by WinNolin 8.2 software.

### **Acute Toxicity Experiment**

A group of Kunming mice (three male and three female) was supplied by the Animal Experimental Center of Shandong University. The mice were fasted for 12 h; then, a suspension of **R<sub>10</sub>L<sub>4</sub>** in 0.5% CMC-Na and 3% DMSO at the concentration of 100 mg·mL<sup>-1</sup> was administered intragastrically to provide a dose of 800 mg·kg<sup>-1</sup>. Experimental group is consisted of six mice (three males and three females).

### **Subacute Toxicity Experiment**

Another batch of three male and three female Kunming mice was randomly divided into four groups (n = 3): male test group, female test group, male vehicle group, and female vehicle group. All mice were deprived of feed for 12 h and then the mice in the test groups were given 50 mg·kg<sup>-1</sup> p.o. of **R<sub>10</sub>L<sub>4</sub>** once every other day for 14 days (D0, D2, D4, D6, D8, D10, and D12), while the mice in control groups received the same volume of blank solution. The mice were weighed before each dosing. All the mice were dissected after euthanasia at D14, and the heart, liver, spleen, lung, and kidney were extracted. These organs were sliced and examined by HE staining.

### **Molecular docking simulation**

The PDB files (6C0N, 6C0L, 2OPQ) are downloaded from Protein Database Bank (rcsb.org). Protein preparation, ligand preparation and docking studies were performed by Schrödinger platform (Maestro version 13.2.128). Protein models are preprocessed, optimized, and minimized under default settings of Protein Preparation Workflow. Waters, ions and unrelated small molecules are deleted manually. Then ligand molecules in NNIBP of each model were used to locate the center of receptor grid boxes, and automatically removed in the established receptor grids. The structure of **R<sub>10</sub>L<sub>4</sub>** and **IAS-0** were prepared by LigPrep under default settings. Ligand docking

was operated by Glide XP (extra precision) module, under default settings and unadjusted van der Waals radii scaling. Upon completion, docking scores and interactions were shown in Schrödinger. 3D files are exported and visualized in Pymol (Version 2.5.2).

**Table S1.** RT inhibitory activity of target compounds.

| Compound                           | IC <sub>50</sub> ± SD (μM) <sup>a</sup> | Compound                           | IC <sub>50</sub> ± SD (μM) |
|------------------------------------|-----------------------------------------|------------------------------------|----------------------------|
| <b>R<sub>1</sub>L<sub>2</sub></b>  | 0.075 ± 0.005                           | <b>R<sub>1</sub>L<sub>3</sub></b>  | 0.160 ± 0.004              |
| <b>R<sub>1</sub>L<sub>4</sub></b>  | 0.140 ± 0.007                           | <b>R<sub>1</sub>L<sub>5</sub></b>  | 0.130 ± 0.007              |
| <b>R<sub>2</sub>L<sub>2</sub></b>  | 0.094 ± 0.002                           | <b>R<sub>2</sub>L<sub>3</sub></b>  | 0.130 ± 0.002              |
| <b>R<sub>2</sub>L<sub>4</sub></b>  | 0.130 ± 0.003                           | <b>R<sub>2</sub>L<sub>5</sub></b>  | 0.160 ± 0.000              |
| <b>R<sub>3</sub>L<sub>2</sub></b>  | 0.100 ± 0.007                           | <b>R<sub>3</sub>L<sub>3</sub></b>  | 0.120 ± 0.005              |
| <b>R<sub>3</sub>L<sub>4</sub></b>  | 0.150 ± 0.013                           | <b>R<sub>3</sub>L<sub>5</sub></b>  | 0.160 ± 0.016              |
| <b>R<sub>4</sub>L<sub>2</sub></b>  | 0.066 ± 0.018                           | <b>R<sub>4</sub>L<sub>3</sub></b>  | 0.100 ± 0.005              |
| <b>R<sub>4</sub>L<sub>4</sub></b>  | 0.150 ± 0.009                           | <b>R<sub>4</sub>L<sub>5</sub></b>  | 0.150 ± 0.012              |
| <b>R<sub>5</sub>L<sub>2</sub></b>  | 0.110 ± 0.032                           | <b>R<sub>5</sub>L<sub>3</sub></b>  | 0.100 ± 0.003              |
| <b>R<sub>5</sub>L<sub>4</sub></b>  | 0.120 ± 0.003                           | <b>R<sub>5</sub>L<sub>5</sub></b>  | 0.160 ± 0.002              |
| <b>R<sub>6</sub>L<sub>2</sub></b>  | 0.120 ± 0.011                           | <b>R<sub>6</sub>L<sub>3</sub></b>  | 0.160 ± 0.016              |
| <b>R<sub>6</sub>L<sub>4</sub></b>  | 0.150 ± 0.015                           | <b>R<sub>6</sub>L<sub>5</sub></b>  | 0.130 ± 0.009              |
| <b>R<sub>7</sub>L<sub>2</sub></b>  | 0.055 ± 0.002                           | <b>R<sub>7</sub>L<sub>3</sub></b>  | 0.078 ± 0.013              |
| <b>R<sub>7</sub>L<sub>4</sub></b>  | 0.094 ± 0.003                           | <b>R<sub>7</sub>L<sub>5</sub></b>  | 0.120 ± 0.011              |
| <b>R<sub>8</sub>L<sub>2</sub></b>  | 0.140 ± 0.015                           | <b>R<sub>8</sub>L<sub>3</sub></b>  | 0.190 ± 0.035              |
| <b>R<sub>8</sub>L<sub>4</sub></b>  | 0.190 ± 0.017                           | <b>R<sub>8</sub>L<sub>5</sub></b>  | 0.220 ± 0.017              |
| <b>R<sub>9</sub>L<sub>2</sub></b>  | 0.055 ± 0.006                           | <b>R<sub>9</sub>L<sub>3</sub></b>  | 0.084 ± 0.011              |
| <b>R<sub>9</sub>L<sub>4</sub></b>  | 0.130 ± 0.014                           | <b>R<sub>9</sub>L<sub>5</sub></b>  | 0.120 ± 0.015              |
| <b>R<sub>10</sub>L<sub>2</sub></b> | 0.060 ± 0.009                           | <b>R<sub>10</sub>L<sub>3</sub></b> | 0.041 ± 0.009              |
| <b>R<sub>10</sub>L<sub>4</sub></b> | 0.077 ± 0.009                           | <b>R<sub>10</sub>L<sub>5</sub></b> | 0.095 ± 0.012              |
| <b>R<sub>11</sub>L<sub>2</sub></b> | 0.083 ± 0.007                           | <b>R<sub>11</sub>L<sub>3</sub></b> | 0.076 ± 0.019              |
| <b>R<sub>11</sub>L<sub>4</sub></b> | 0.120 ± 0.015                           | <b>R<sub>12</sub>L<sub>2</sub></b> | 0.083 ± 0.011              |
| <b>R<sub>12</sub>L<sub>3</sub></b> | 0.130 ± 0.016                           | <b>R<sub>12</sub>L<sub>4</sub></b> | 0.150 ± 0.017              |
| <b>R<sub>13</sub>L<sub>2</sub></b> | 0.057 ± 0.012                           | <b>R<sub>14</sub>L<sub>2</sub></b> | 0.180 ± 0.000              |
| <b>IAS-0</b>                       | 0.018 ± 0.002                           | <b>EFV<sup>b</sup></b>             | 0.030 ± 0.000              |

<sup>a</sup>IC<sub>50</sub>: Compound concentration required to inhibit 50% incorporation of biotin-labeled UTP by HIV-1 (WT) RT. <sup>b</sup>All data were obtained from one batch with the same method.

# $^1\text{H}$ NMR and $^{13}\text{C}$ NMR spectra of final compounds

## $^1\text{H}$ NMR (600 MHz, $\text{DMSO}-d_6$ ) of $\text{R}_1\text{L}_2$

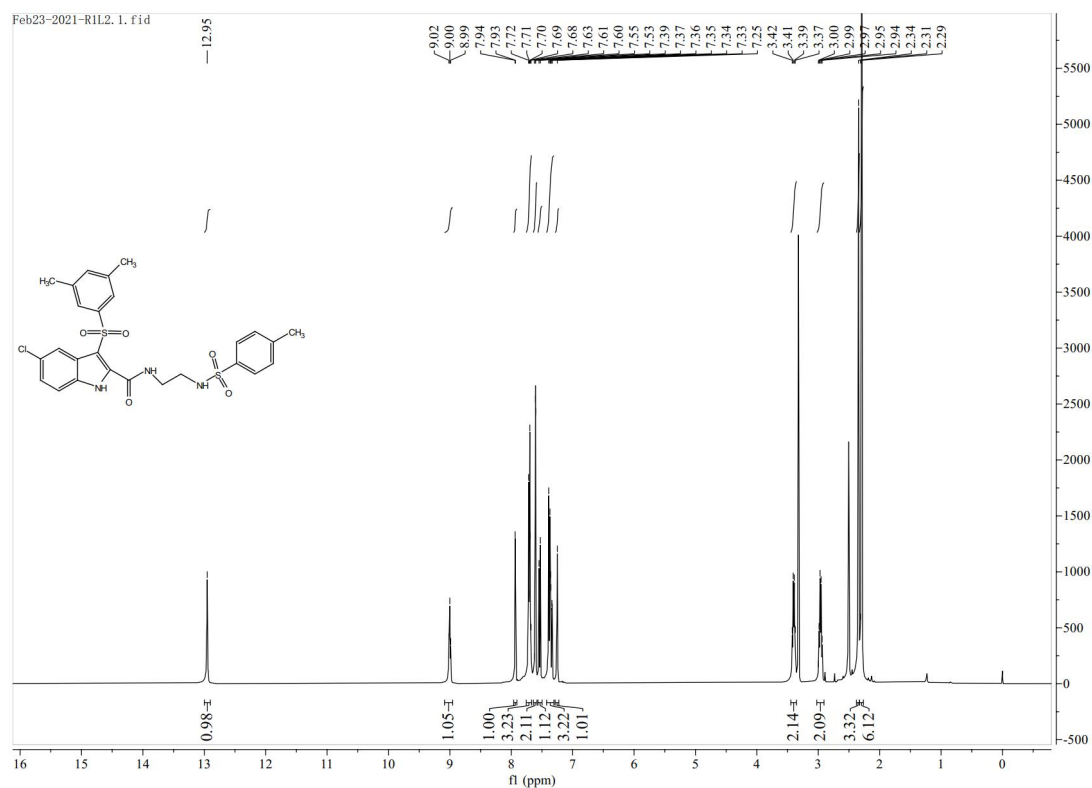

## $^{13}\text{C}$ NMR (150 MHz, $\text{DMSO}-d_6$ ) of $\text{R}_1\text{L}_2$

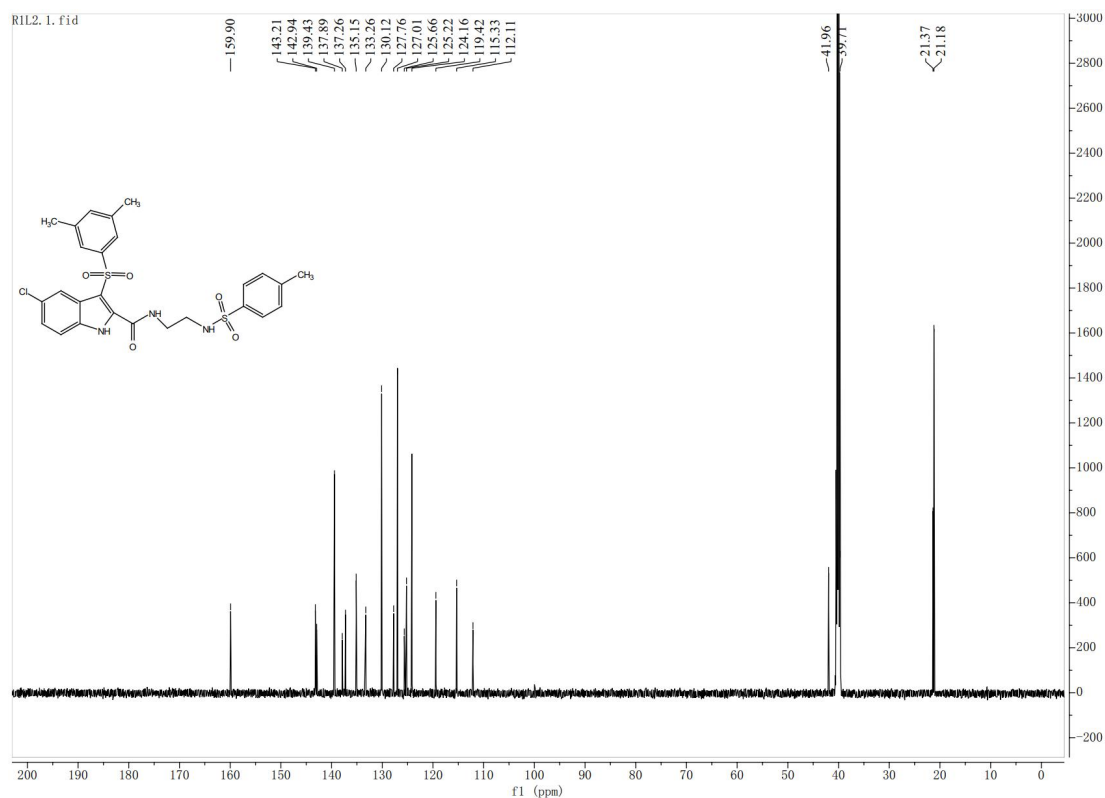

$^1\text{H}$  NMR (600 MHz,  $\text{DMSO-}d_6$ ) of  $\text{R}_1\text{L}_3$

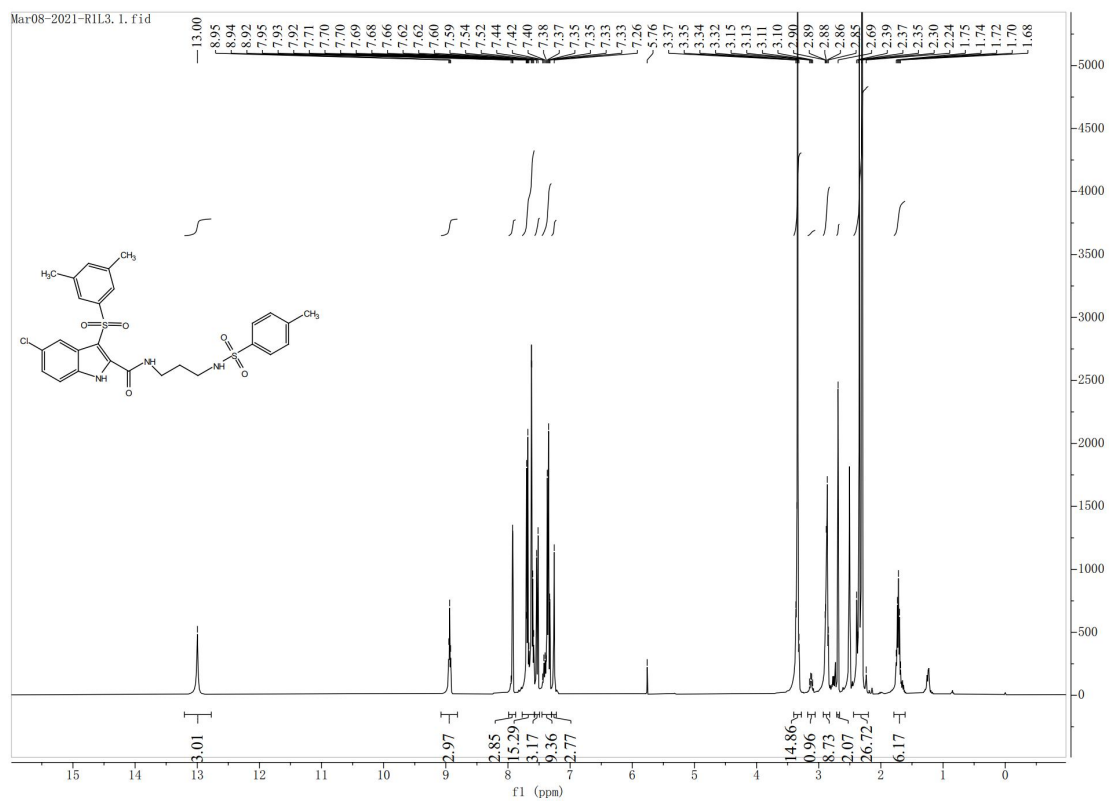

$^{13}\text{C}$  NMR (150 MHz,  $\text{DMSO-}d_6$ ) of  $\text{R}_1\text{L}_3$

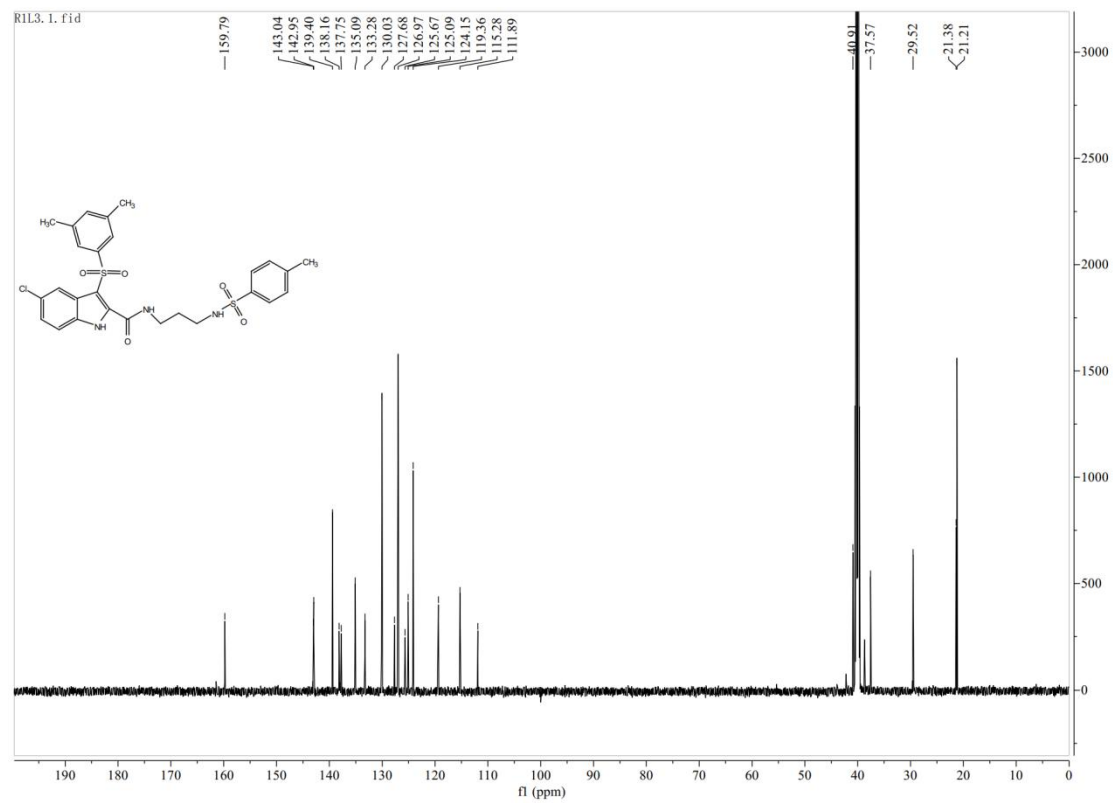

$^1\text{H}$  NMR (600 MHz,  $\text{DMSO}-d_6$ ) of  $\text{R}_1\text{L}_4$

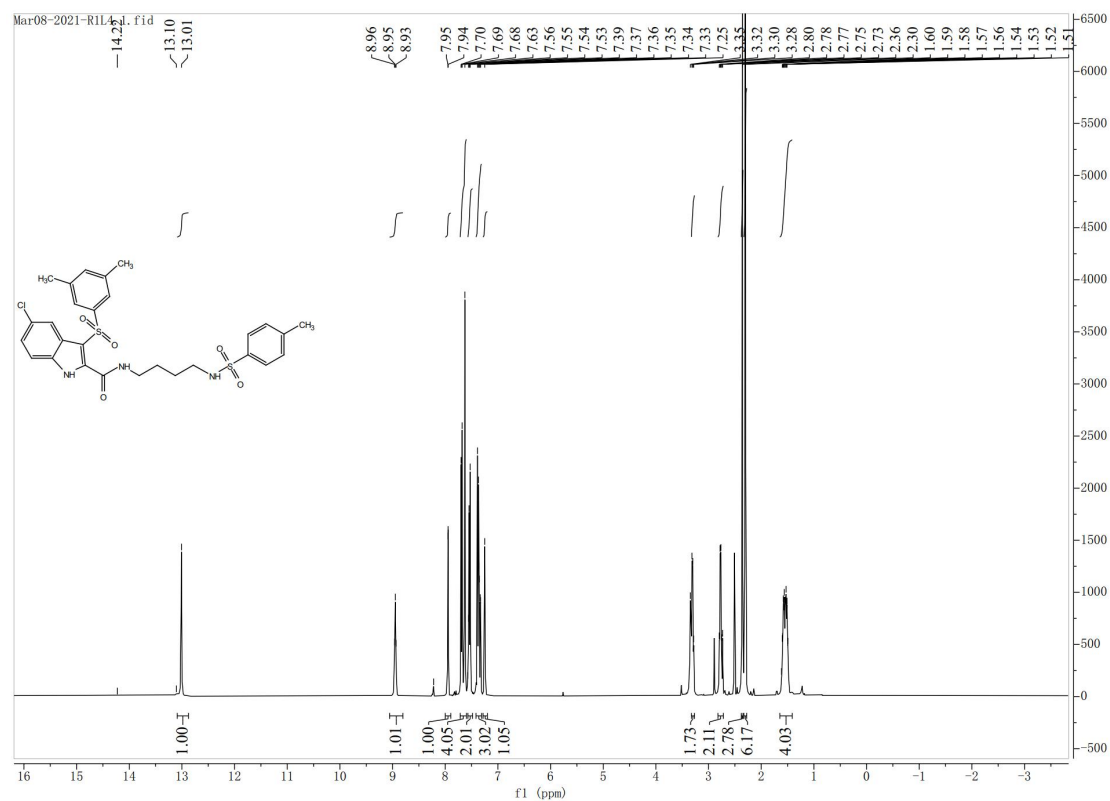

$^{13}\text{C}$  NMR (150 MHz,  $\text{DMSO}-d_6$ ) of  $\text{R}_1\text{L}_4$

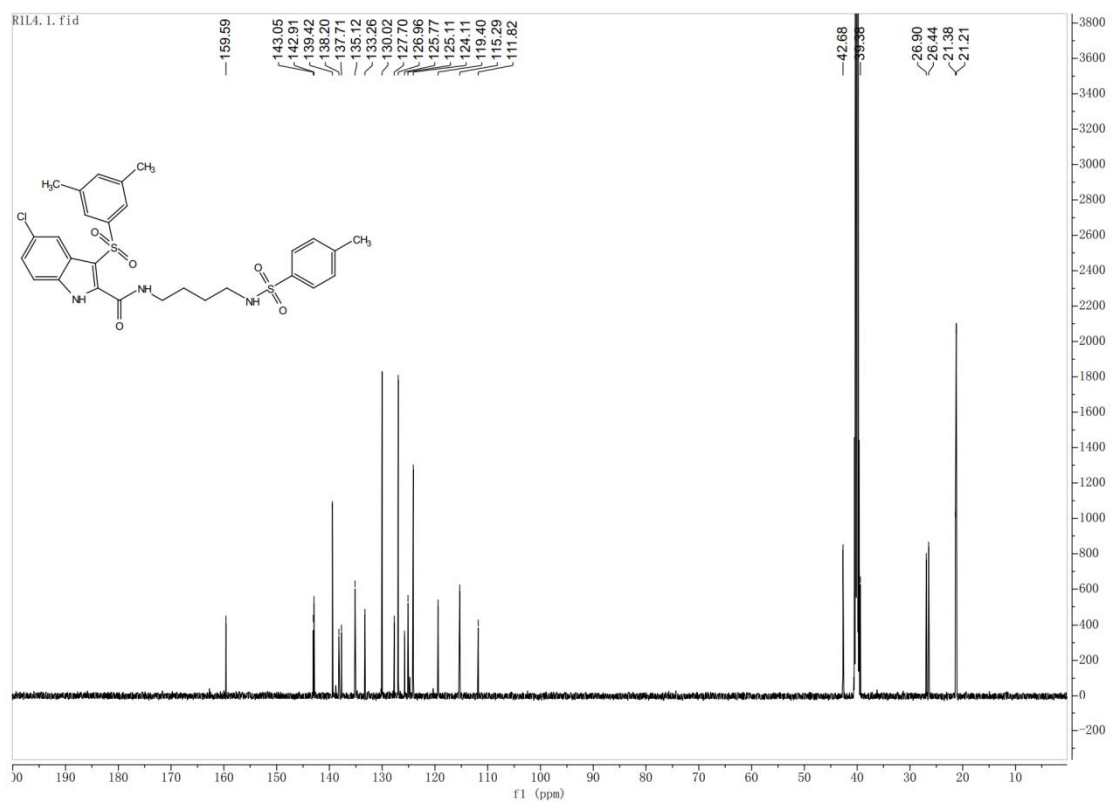

$^1\text{H}$  NMR (600 MHz,  $\text{DMSO}-d_6$ ) of  $\text{R}_1\text{L}_5$

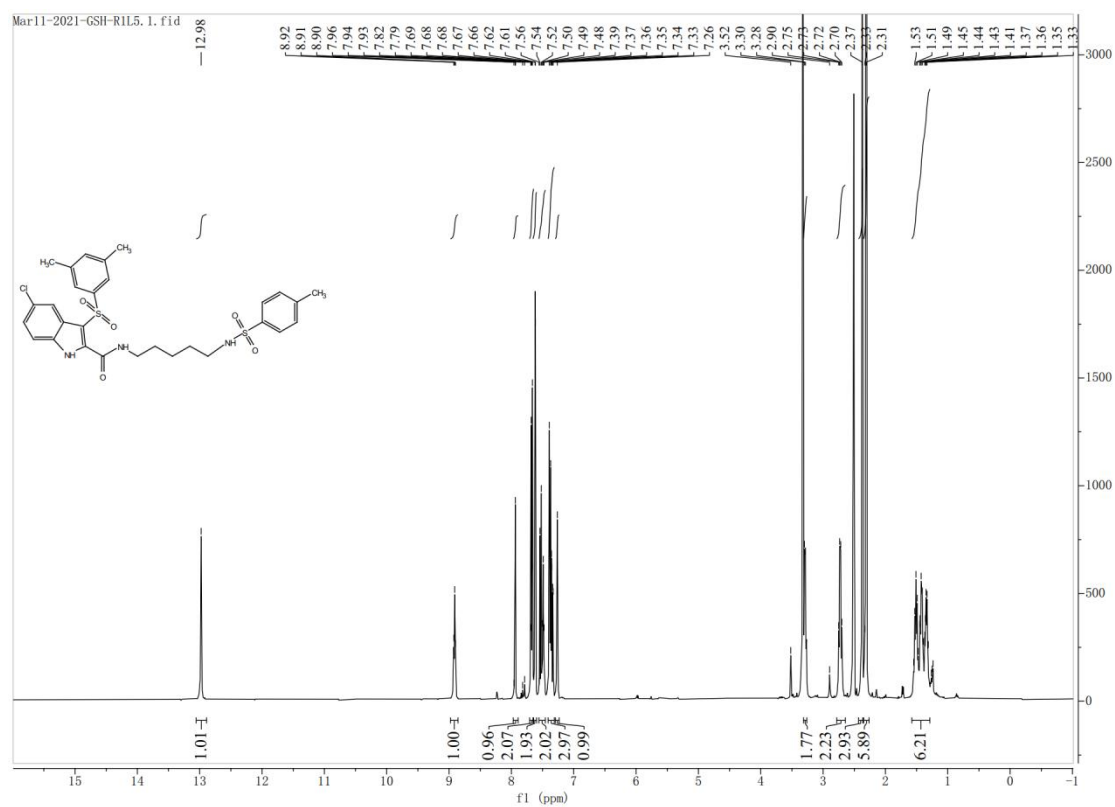

$^{13}\text{C}$  NMR (150 MHz,  $\text{DMSO}-d_6$ ) of  $\text{R}_1\text{L}_5$

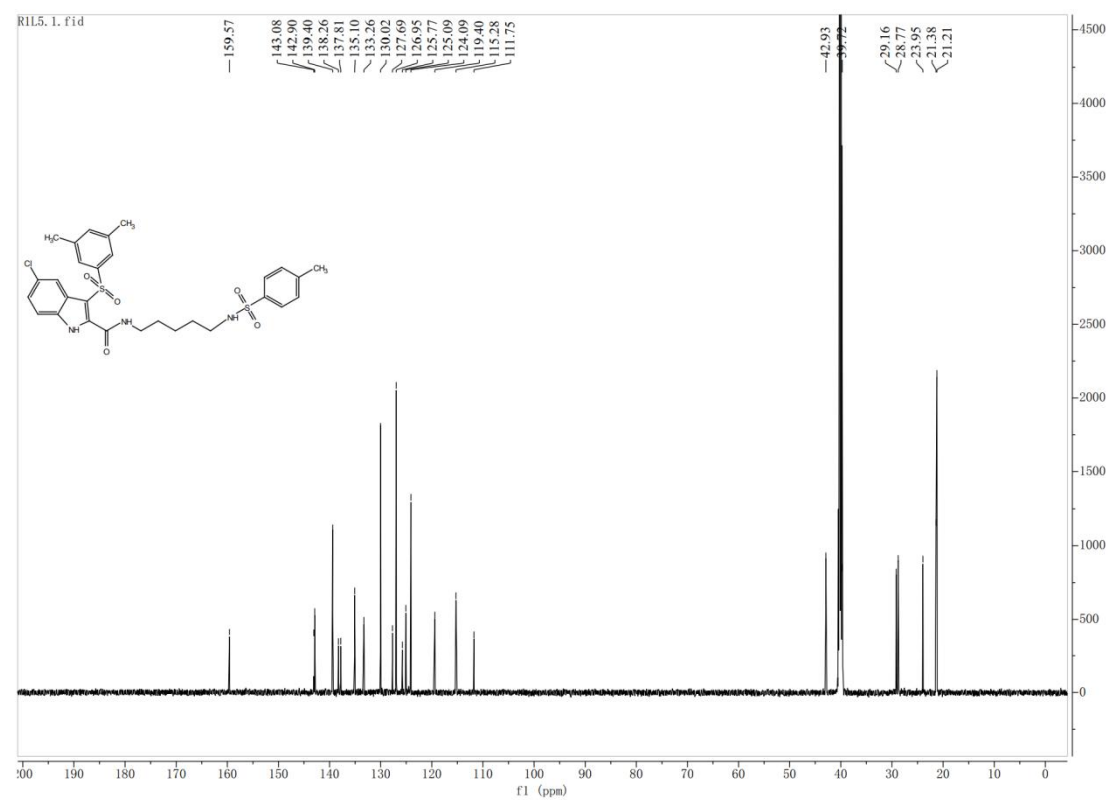

$^1\text{H}$  NMR (600 MHz,  $\text{DMSO-}d_6$ ) of  $\text{R}_2\text{L}_2$

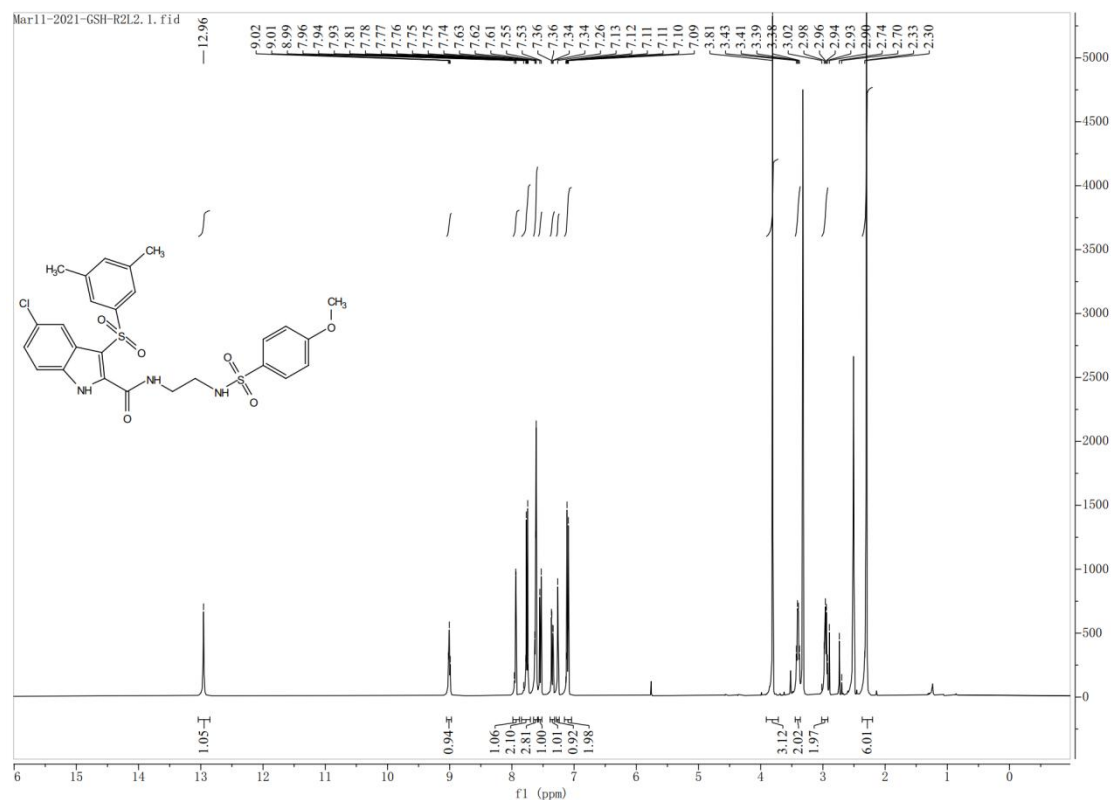

$^{13}\text{C}$  NMR (150 MHz,  $\text{DMSO-}d_6$ ) of  $\text{R}_2\text{L}_2$

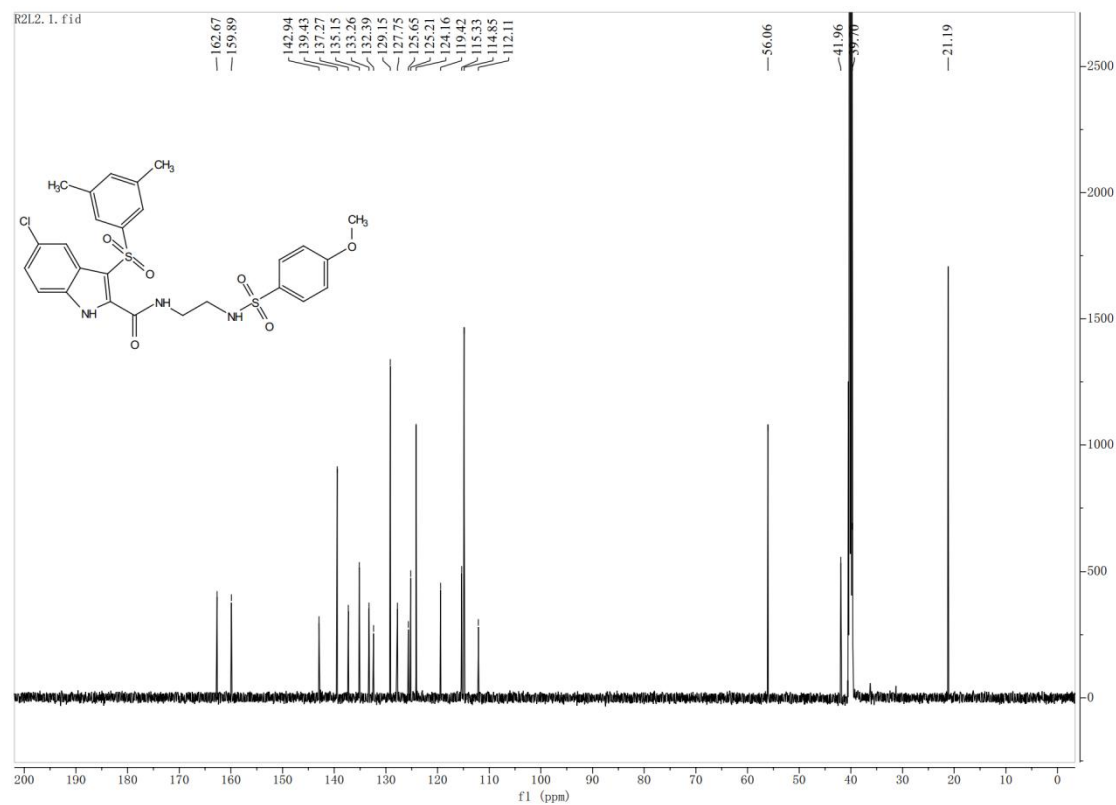

$^1\text{H}$  NMR (600 MHz,  $\text{DMSO-}d_6$ ) of  $\text{R}_2\text{L}_3$

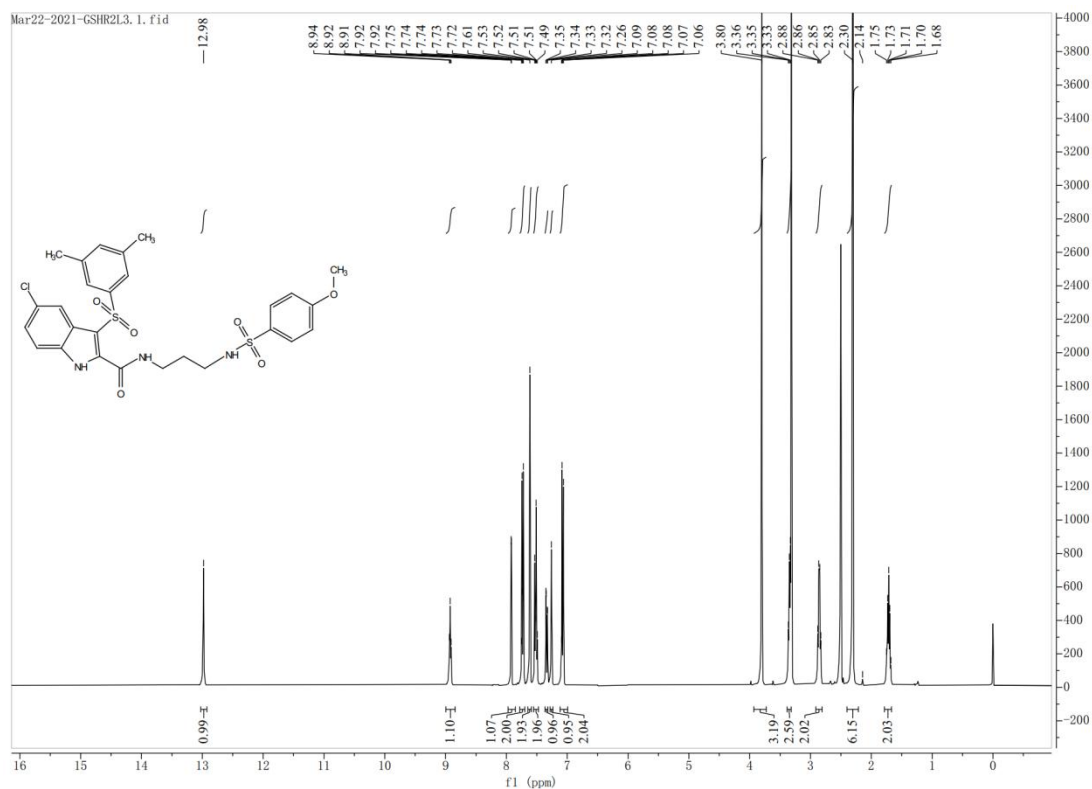

$^{13}\text{C}$  NMR (150 MHz,  $\text{DMSO-}d_6$ ) of  $\text{R}_2\text{L}_3$

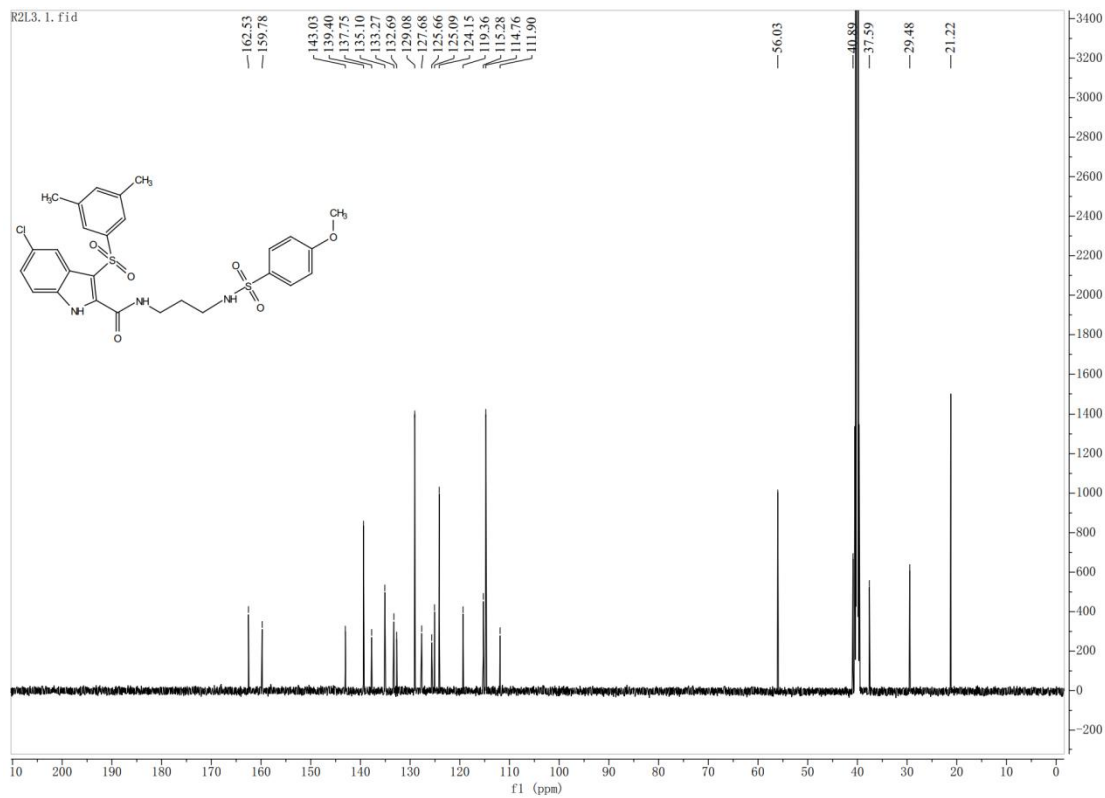

$^1\text{H}$  NMR (600 MHz,  $\text{DMSO}-d_6$ ) of **R<sub>2</sub>L<sub>4</sub>**

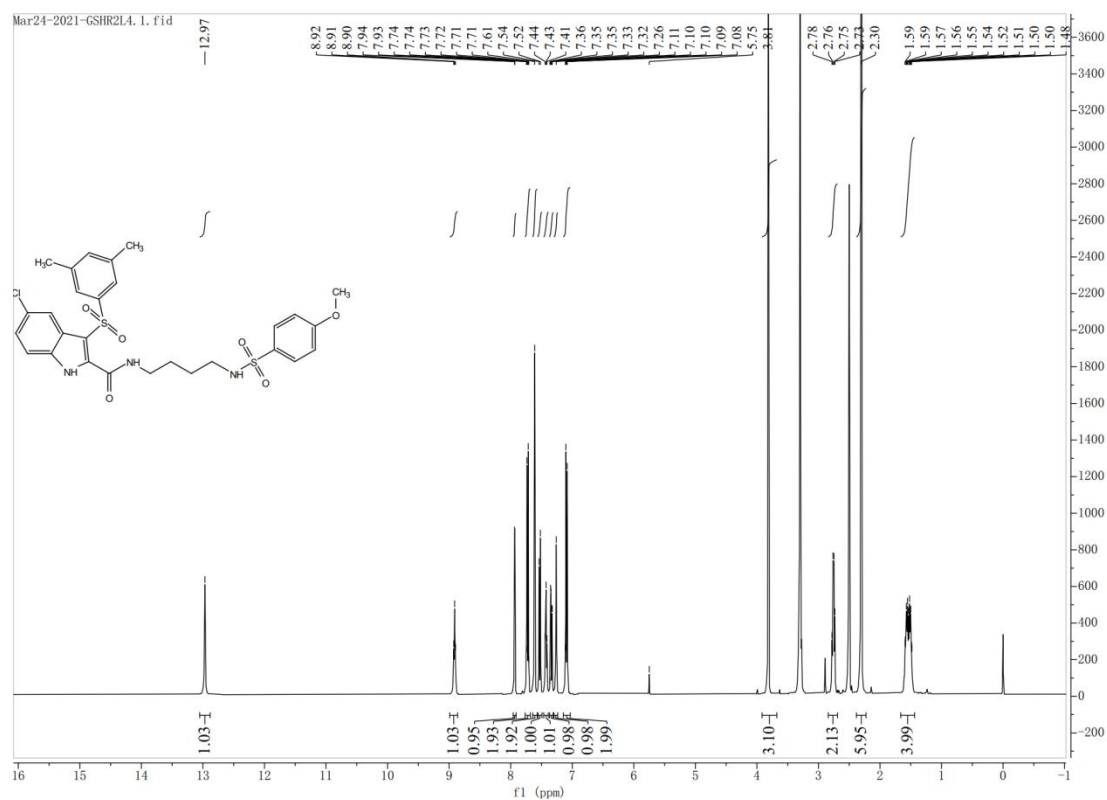

$^{13}\text{C}$  NMR (150 MHz,  $\text{DMSO}-d_6$ ) of **R<sub>2</sub>L<sub>4</sub>**

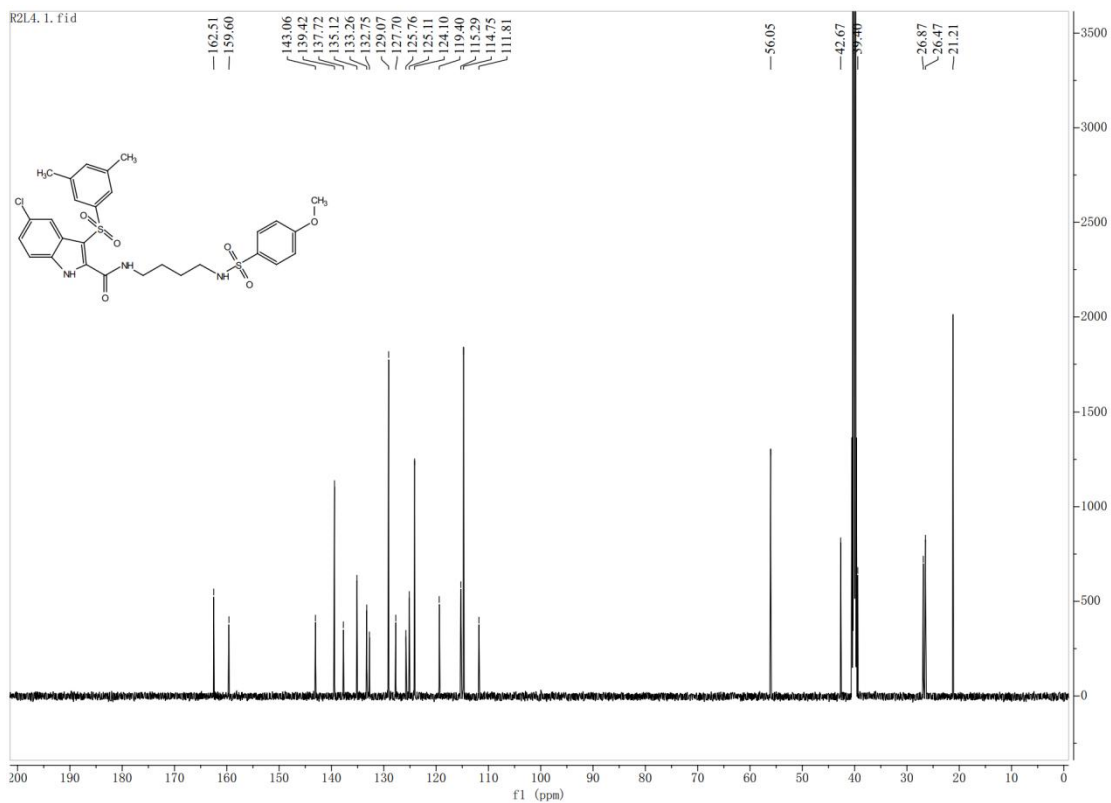

$^1\text{H}$  NMR (600 MHz,  $\text{DMSO}-d_6$ ) of **R<sub>2</sub>L<sub>5</sub>**

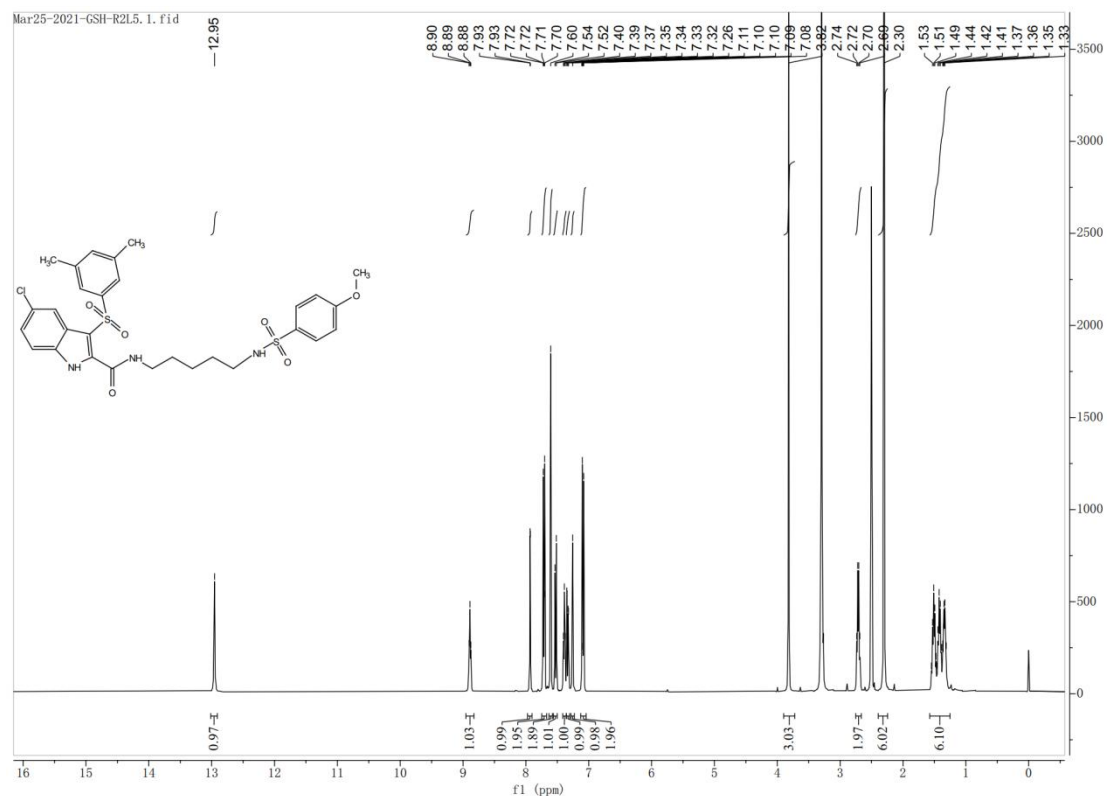

$^{13}\text{C}$  NMR (150 MHz,  $\text{DMSO}-d_6$ ) of **R<sub>2</sub>L<sub>5</sub>**

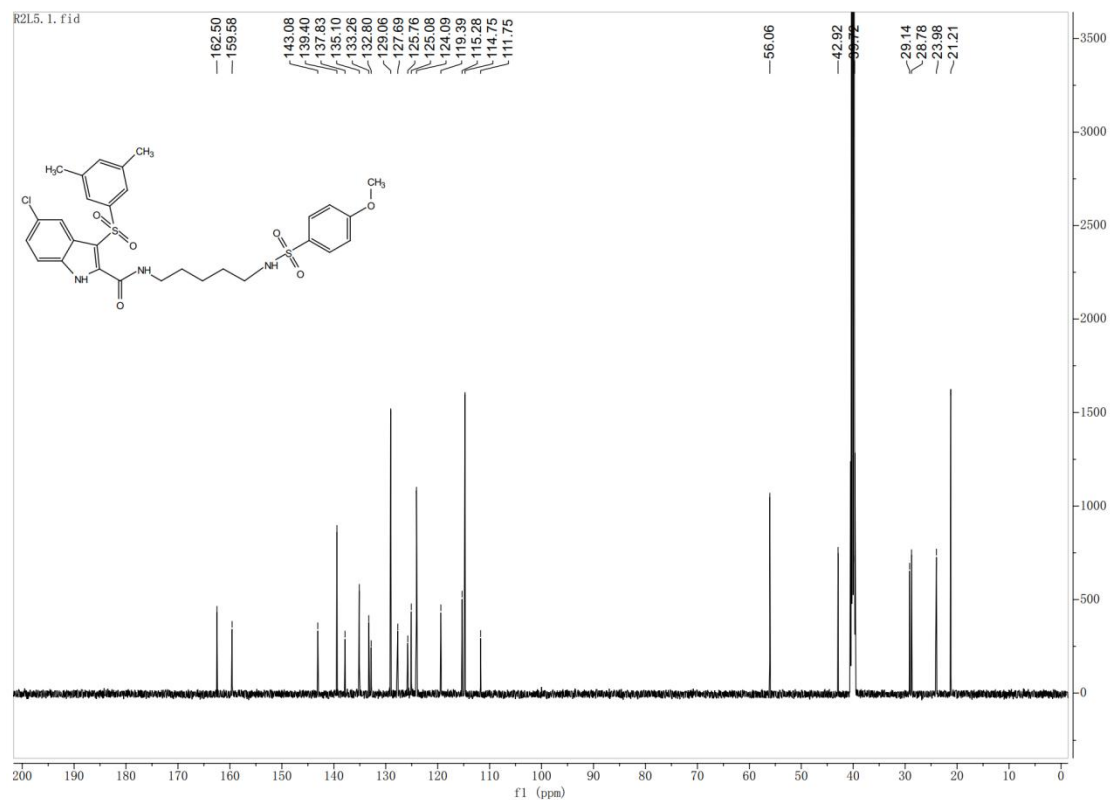

$^1\text{H}$  NMR (600 MHz,  $\text{DMSO-}d_6$ ) of  $\text{R}_3\text{L}_2$

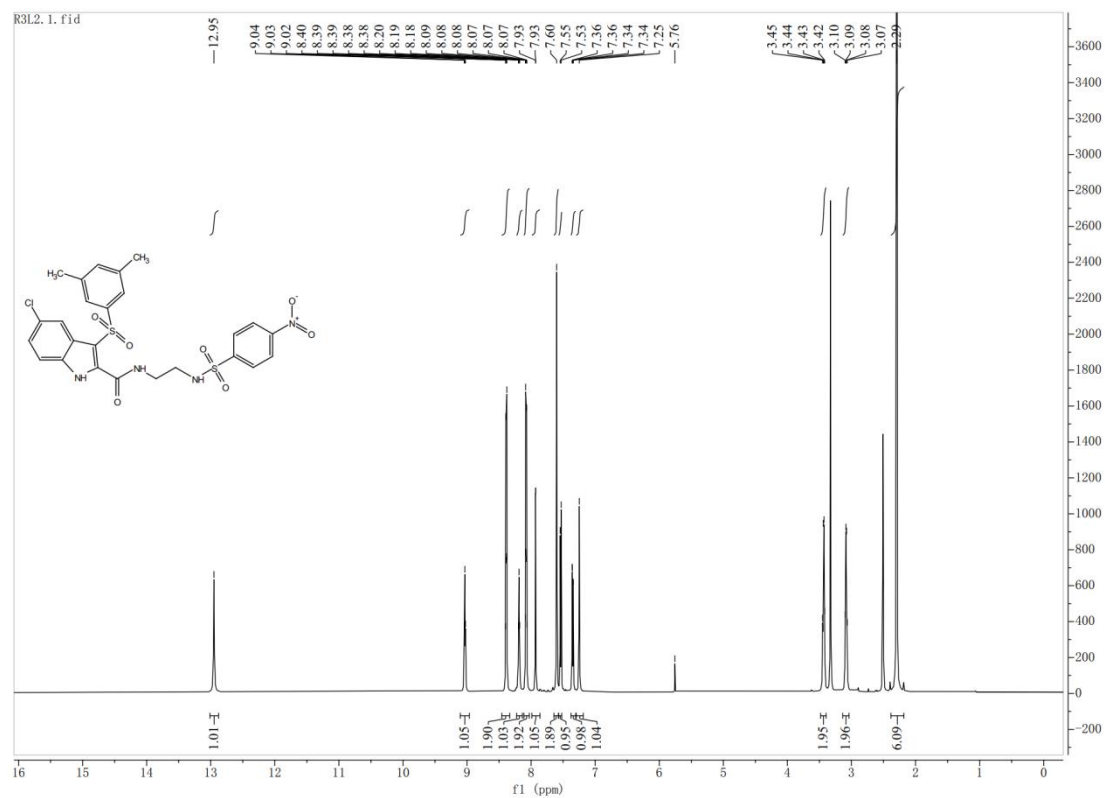

$^{13}\text{C}$  NMR (150 MHz,  $\text{DMSO-}d_6$ ) of  $\text{R}_3\text{L}_2$

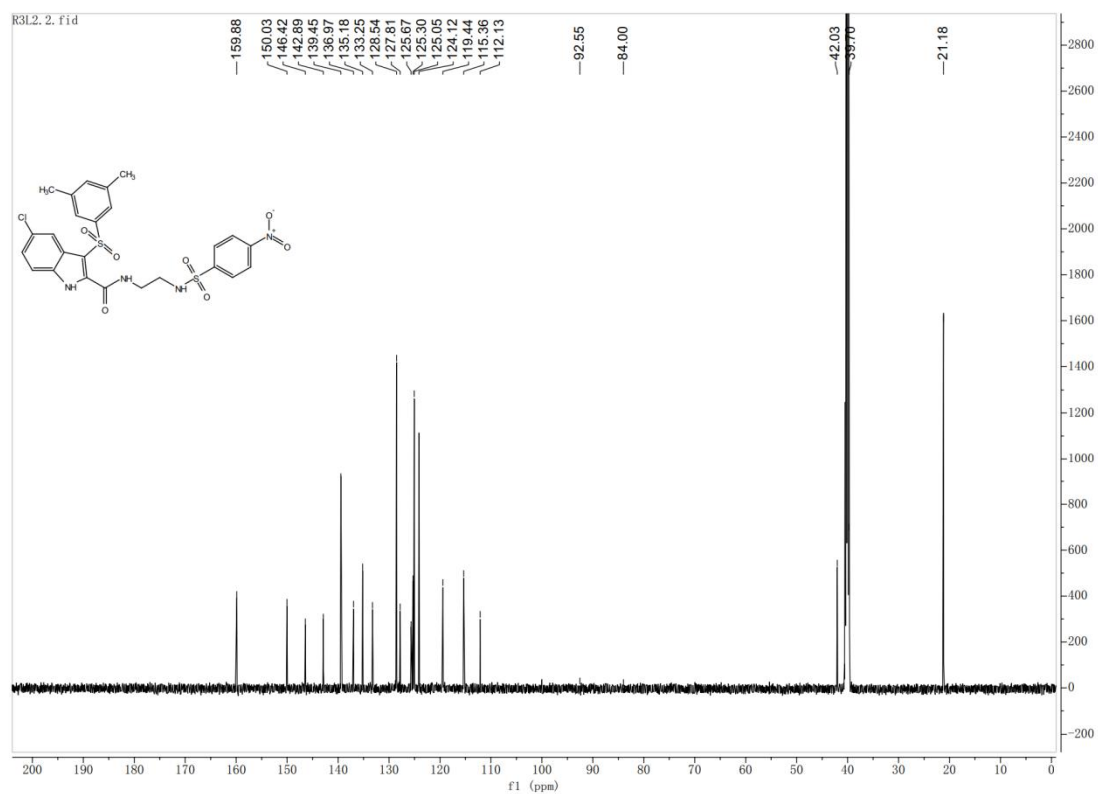

$^1\text{H}$  NMR (600 MHz,  $\text{DMSO-}d_6$ ) of  $\text{R}_3\text{L}_3$

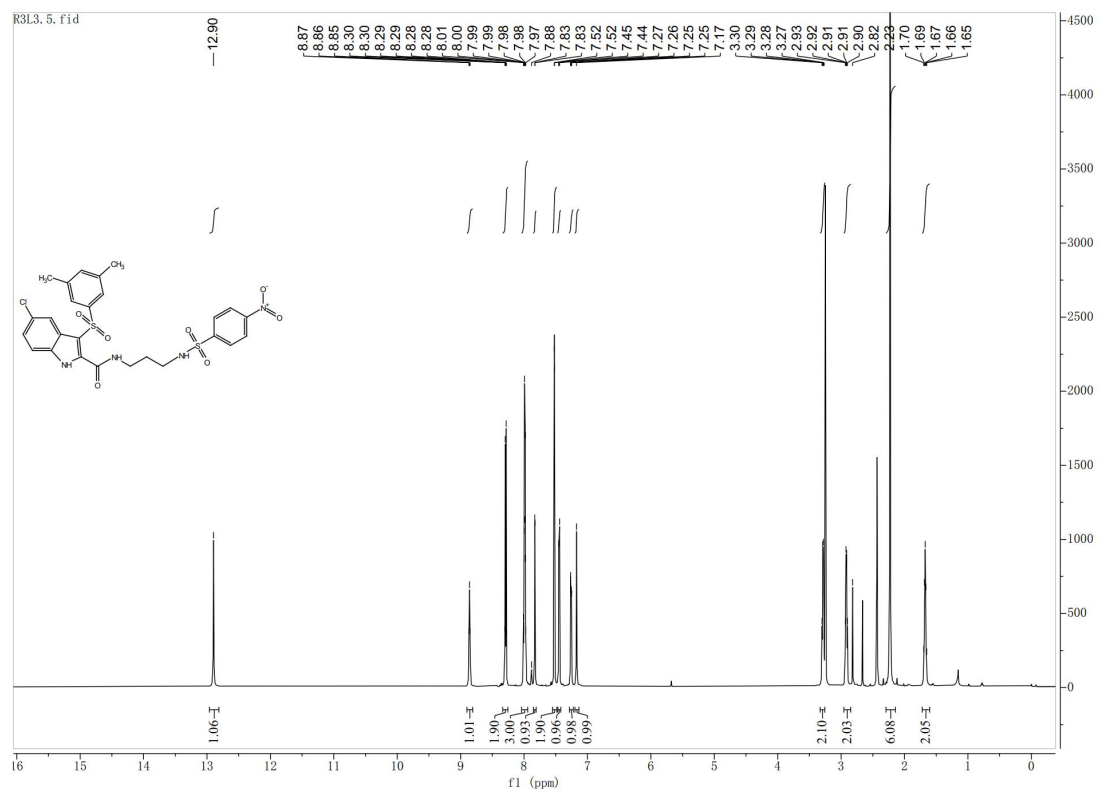

$^{13}\text{C}$  NMR (150 MHz,  $\text{DMSO-}d_6$ ) of  $\text{R}_3\text{L}_3$

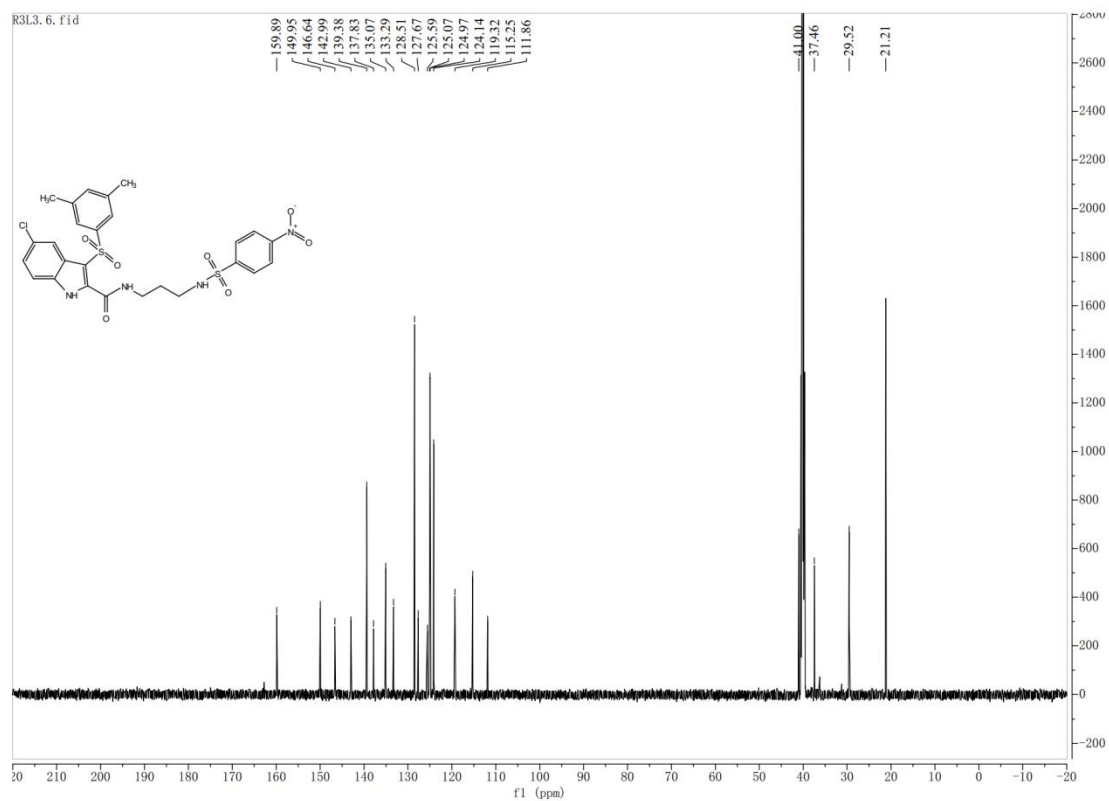

$^1\text{H}$  NMR (600 MHz,  $\text{DMSO-}d_6$ ) of **R<sub>3</sub>L<sub>4</sub>**

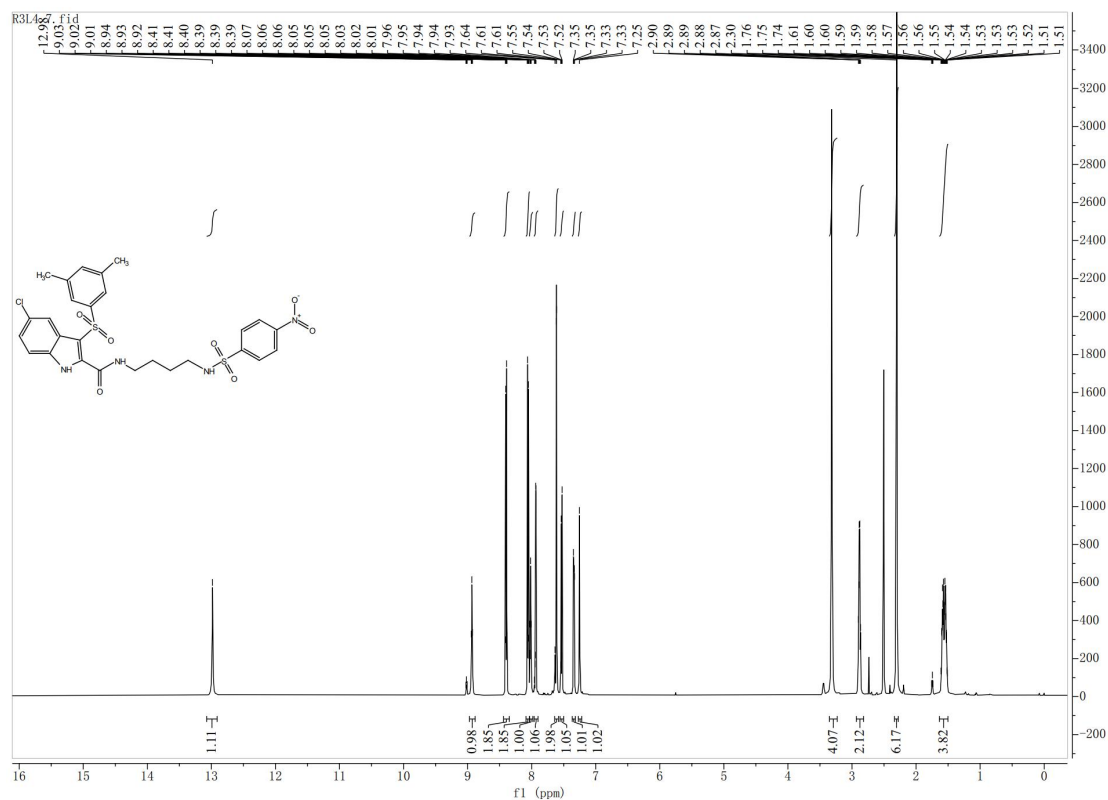

$^{13}\text{C}$  NMR (150 MHz,  $\text{DMSO-}d_6$ ) of **R<sub>3</sub>L<sub>4</sub>**

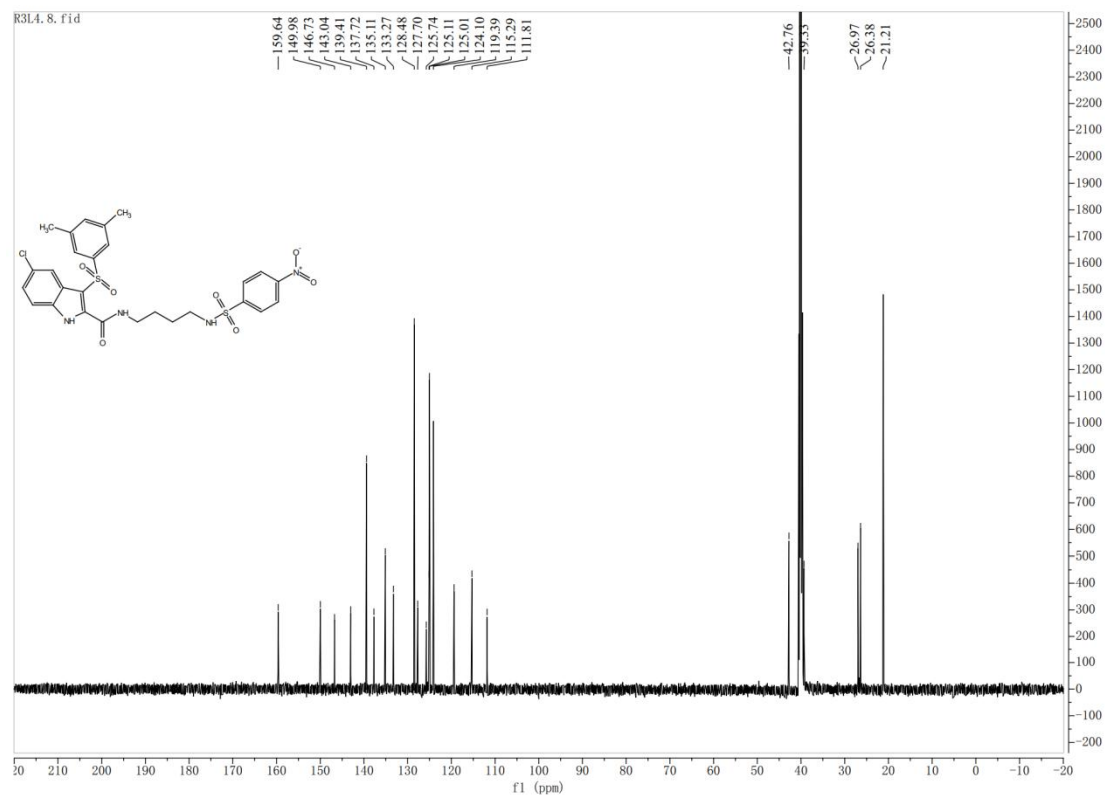

$^1\text{H}$  NMR (600 MHz,  $\text{DMSO-}d_6$ ) of **R<sub>3</sub>L<sub>5</sub>**

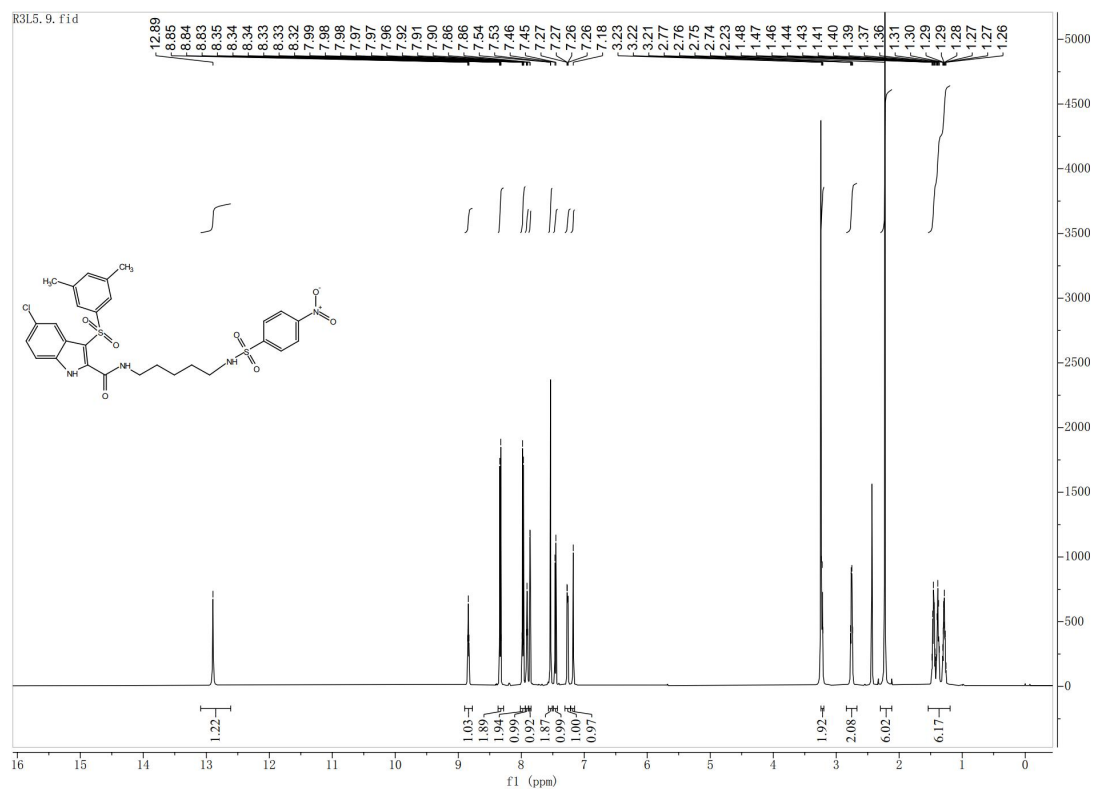

$^{13}\text{C}$  NMR (150 MHz,  $\text{DMSO-}d_6$ ) of **R<sub>3</sub>L<sub>5</sub>**

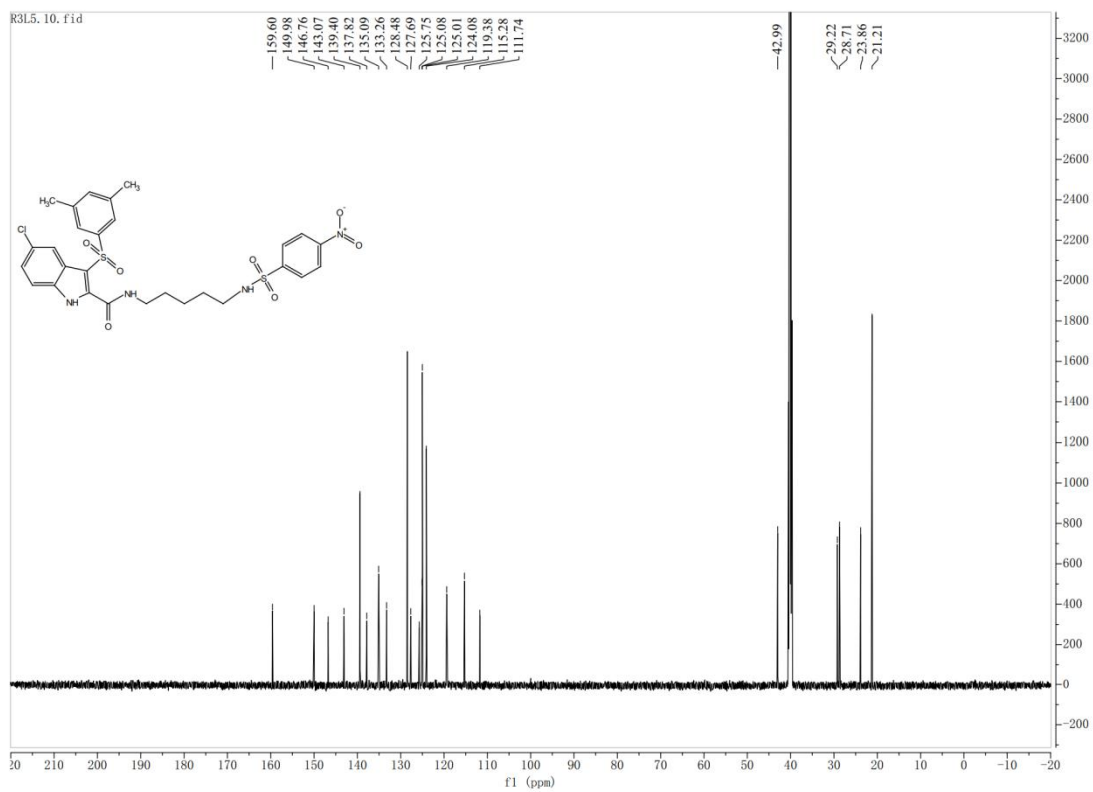

$^1\text{H}$  NMR (600 MHz,  $\text{DMSO}-d_6$ ) of  $\text{R}_4\text{L}_2$

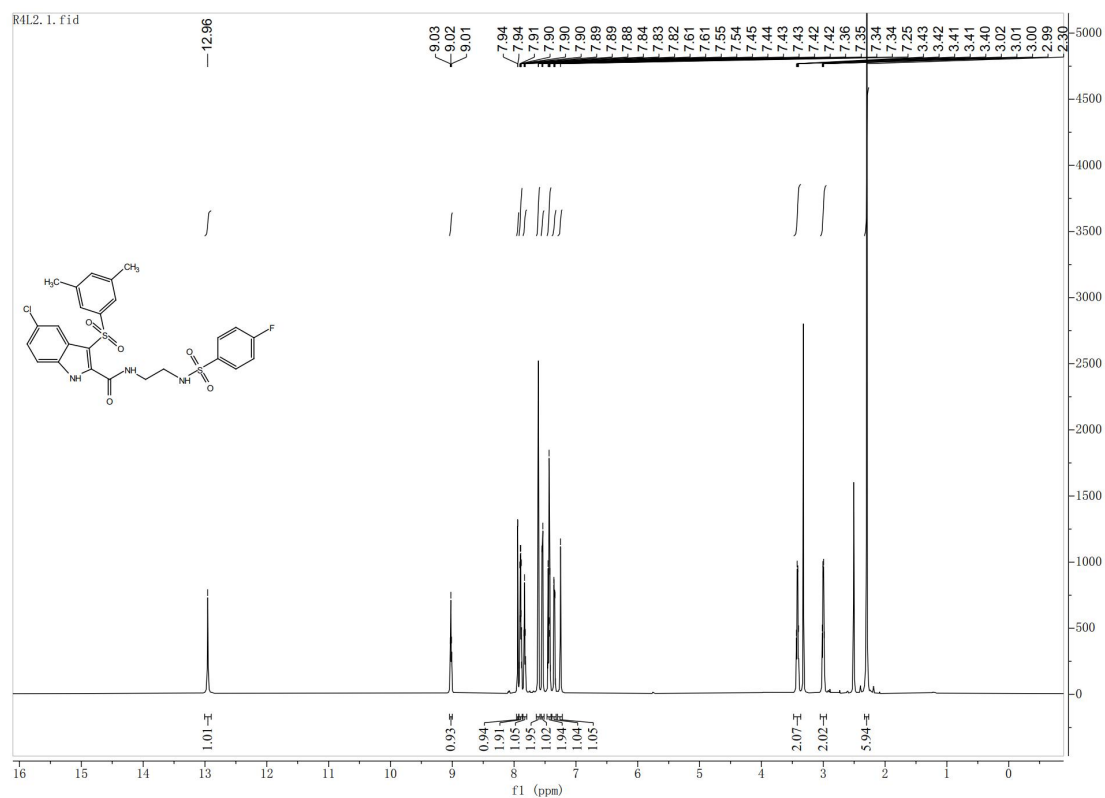

$^{13}\text{C}$  NMR (150 MHz,  $\text{DMSO}-d_6$ ) of  $\text{R}_4\text{L}_2$

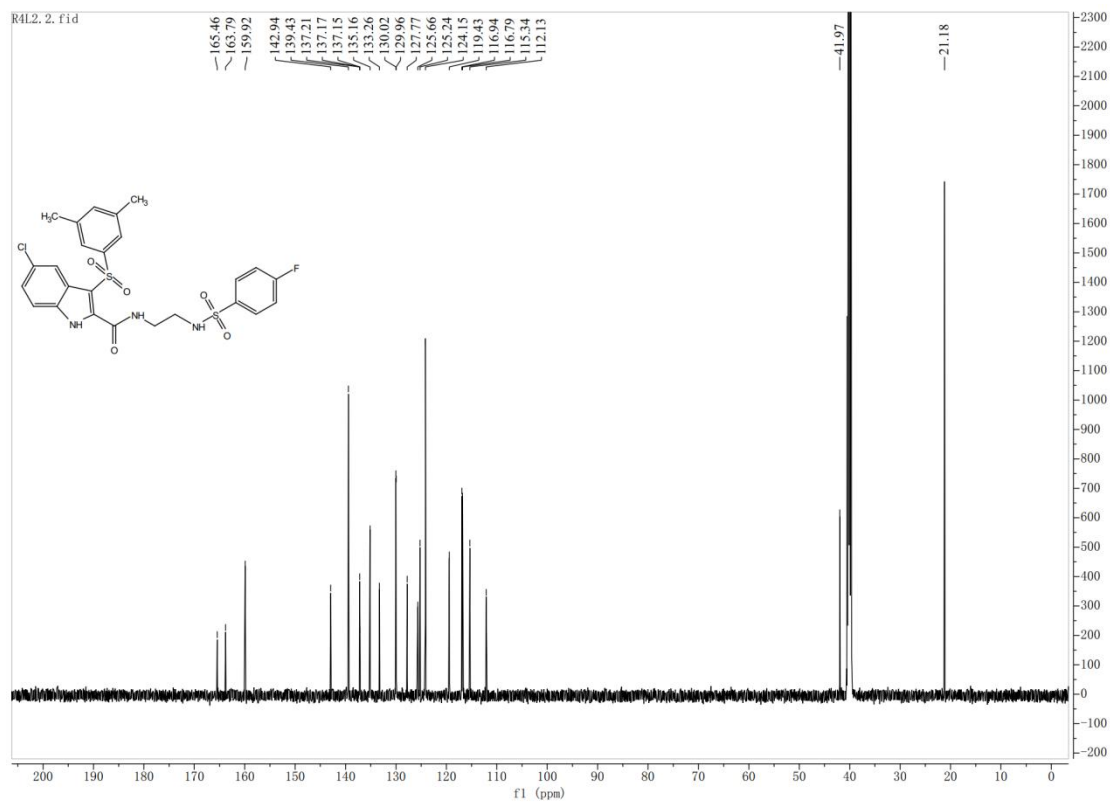

$^1\text{H}$  NMR (600 MHz,  $\text{DMSO-}d_6$ ) of **R<sub>4</sub>L<sub>3</sub>**

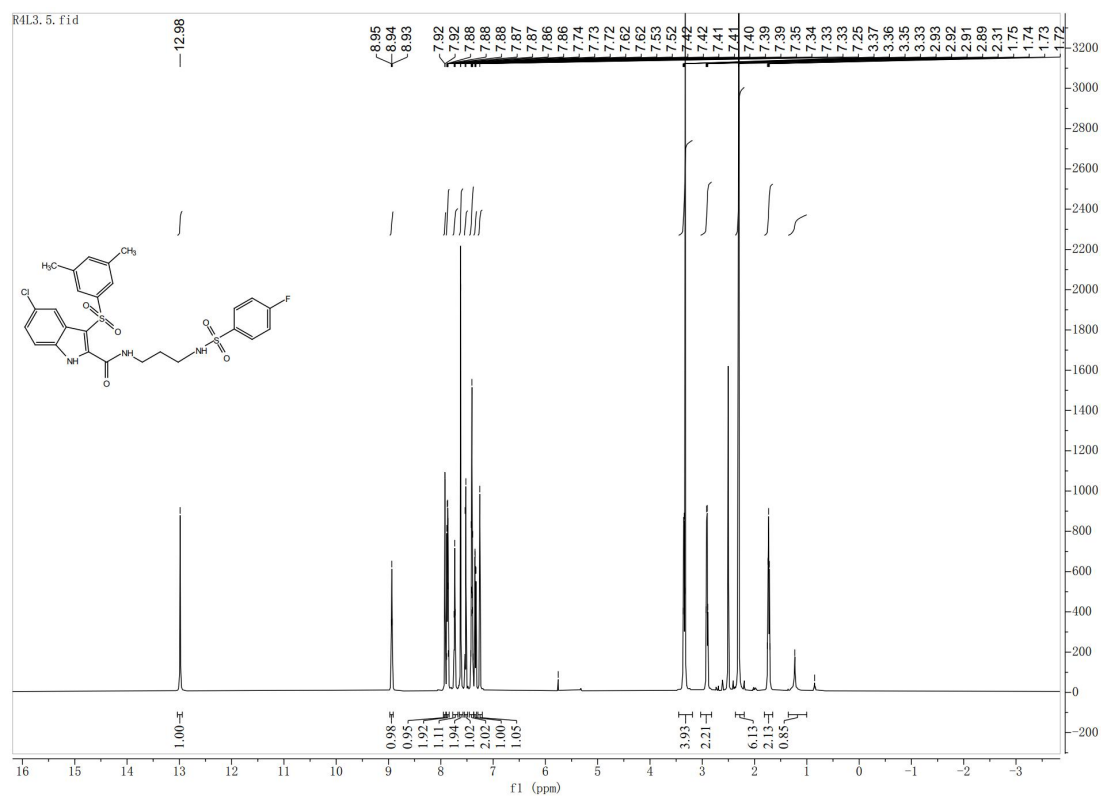

$^{13}\text{C}$  NMR (150 MHz,  $\text{DMSO-}d_6$ ) of **R<sub>4</sub>L<sub>3</sub>**

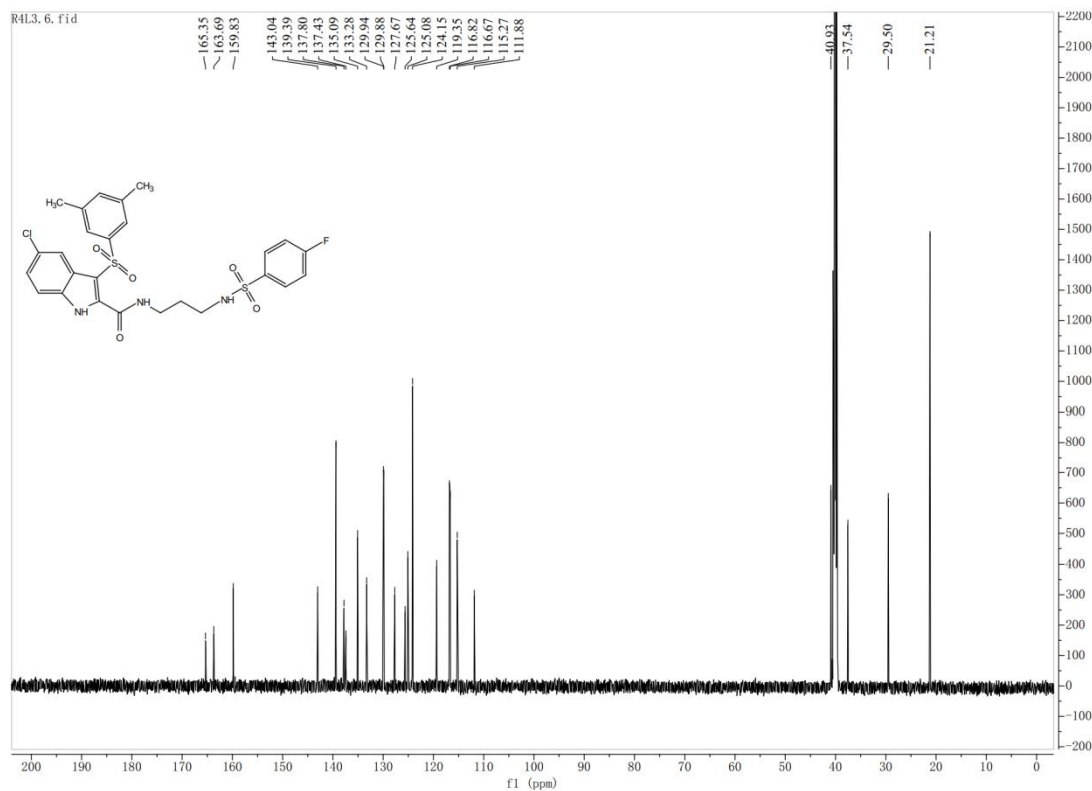

$^1\text{H}$  NMR (600 MHz,  $\text{DMSO}-d_6$ ) of **R<sub>4</sub>L<sub>4</sub>**

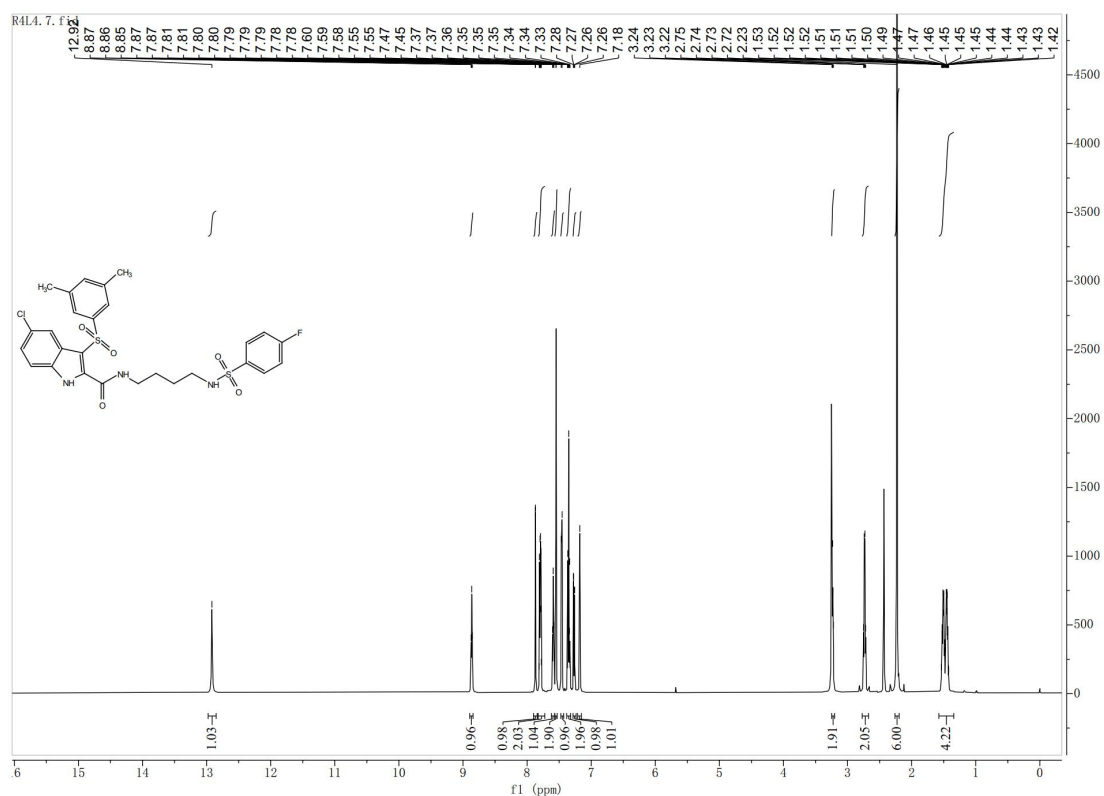

$^{13}\text{C}$  NMR (150 MHz,  $\text{DMSO}-d_6$ ) of **R<sub>4</sub>L<sub>4</sub>**

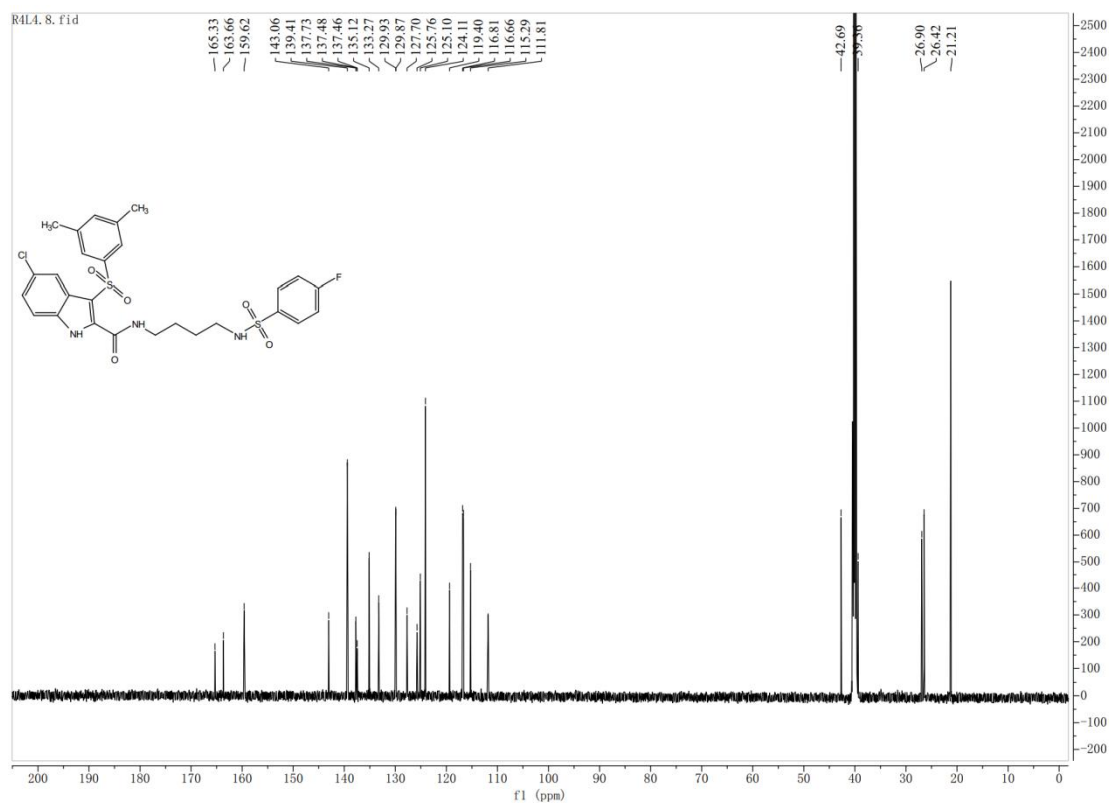

$^1\text{H}$  NMR (600 MHz,  $\text{DMSO}-d_6$ ) of **R<sub>4</sub>L<sub>5</sub>**

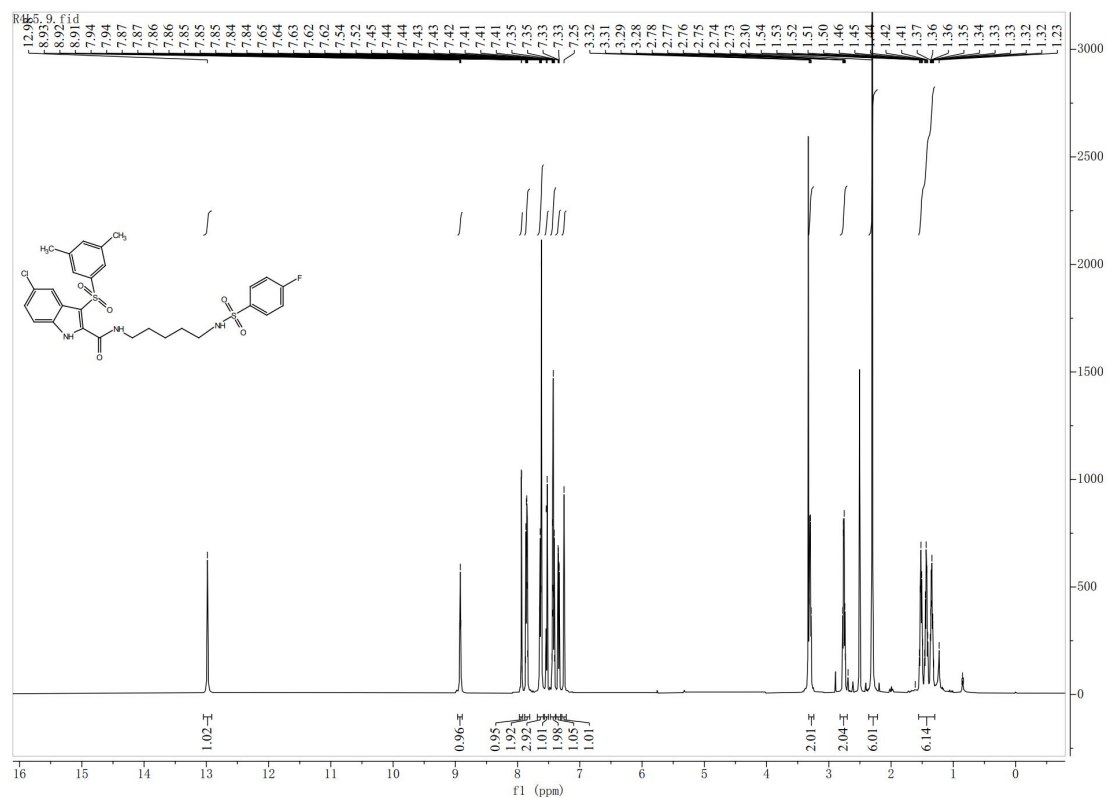

$^{13}\text{C}$  NMR (150 MHz,  $\text{DMSO}-d_6$ ) of **R<sub>4</sub>L<sub>5</sub>**

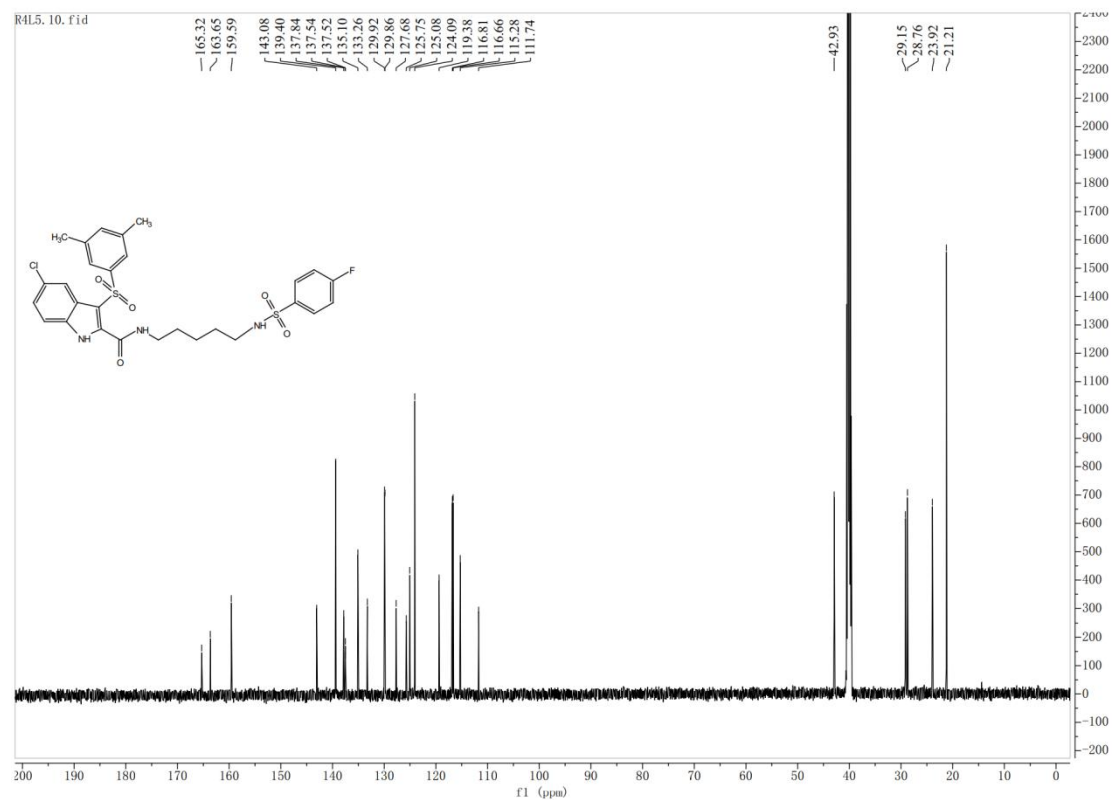

$^1\text{H}$  NMR (600 MHz,  $\text{DMSO-}d_6$ ) of  $\text{R}_5\text{L}_2$

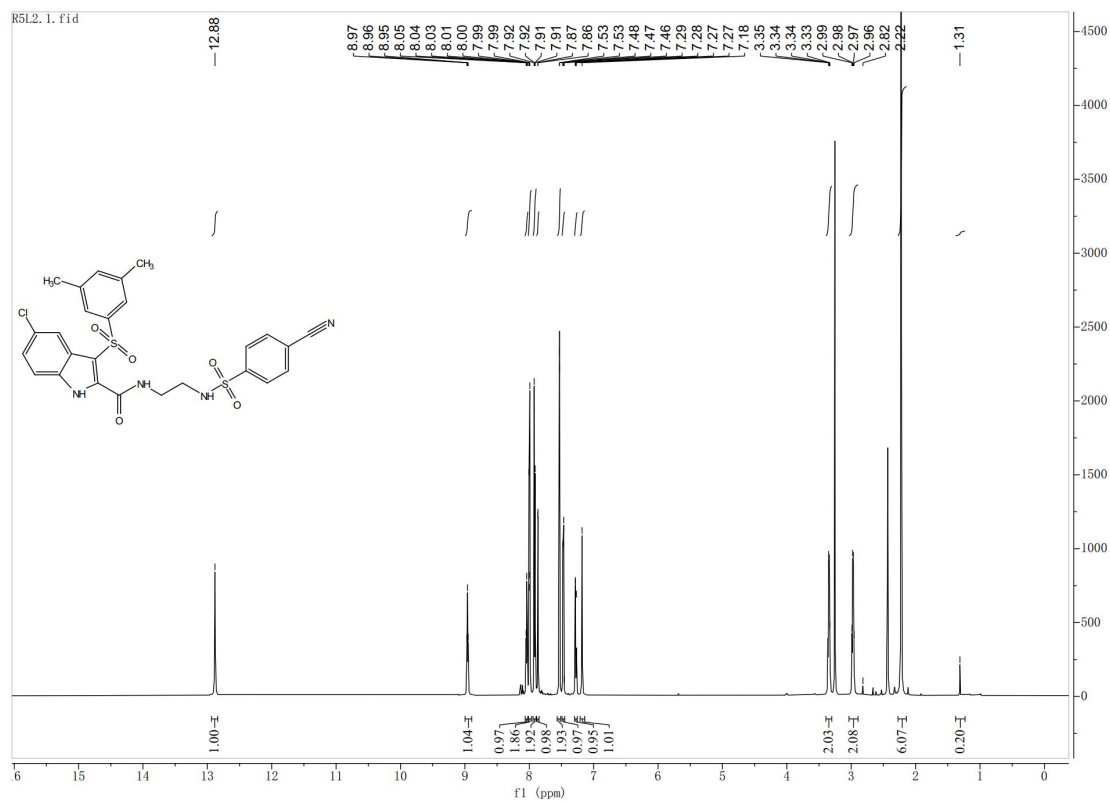

$^{13}\text{C}$  NMR (150 MHz,  $\text{DMSO-}d_6$ ) of  $\text{R}_5\text{L}_2$

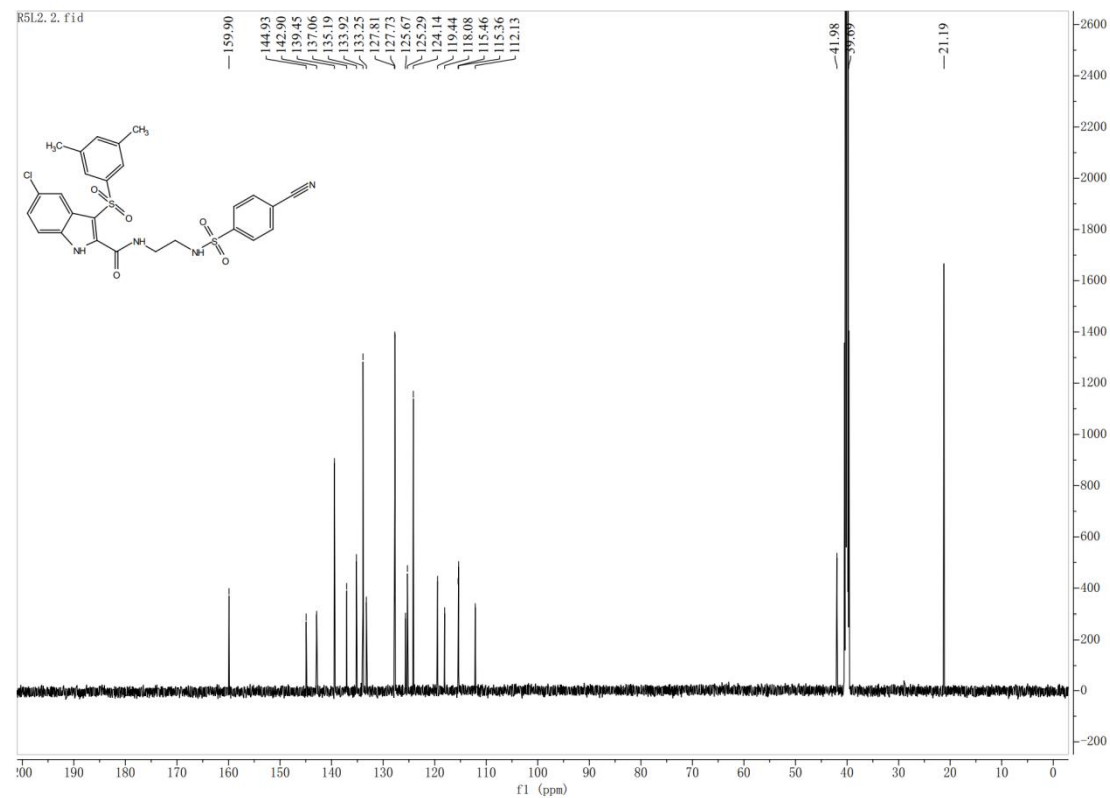

$^1\text{H}$  NMR (600 MHz,  $\text{DMSO-}d_6$ ) of  $\text{R}_5\text{L}_3$

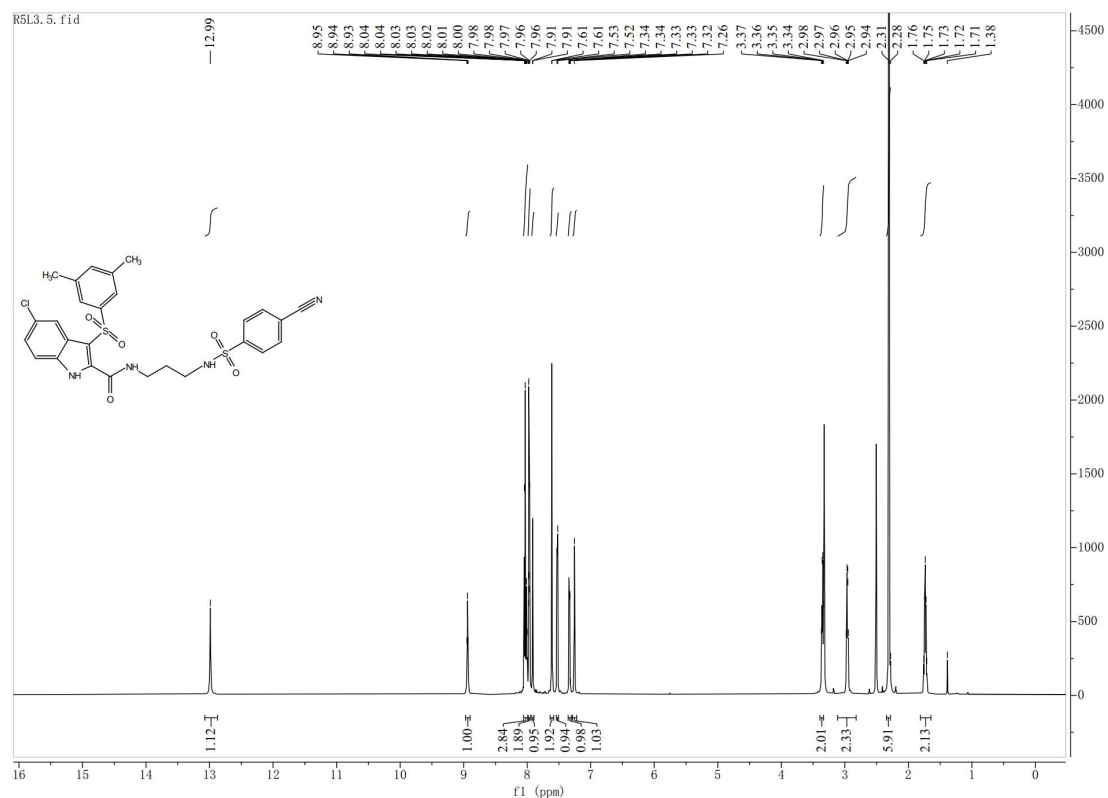

$^{13}\text{C}$  NMR (150 MHz,  $\text{DMSO-}d_6$ ) of  $\text{R}_5\text{L}_3$

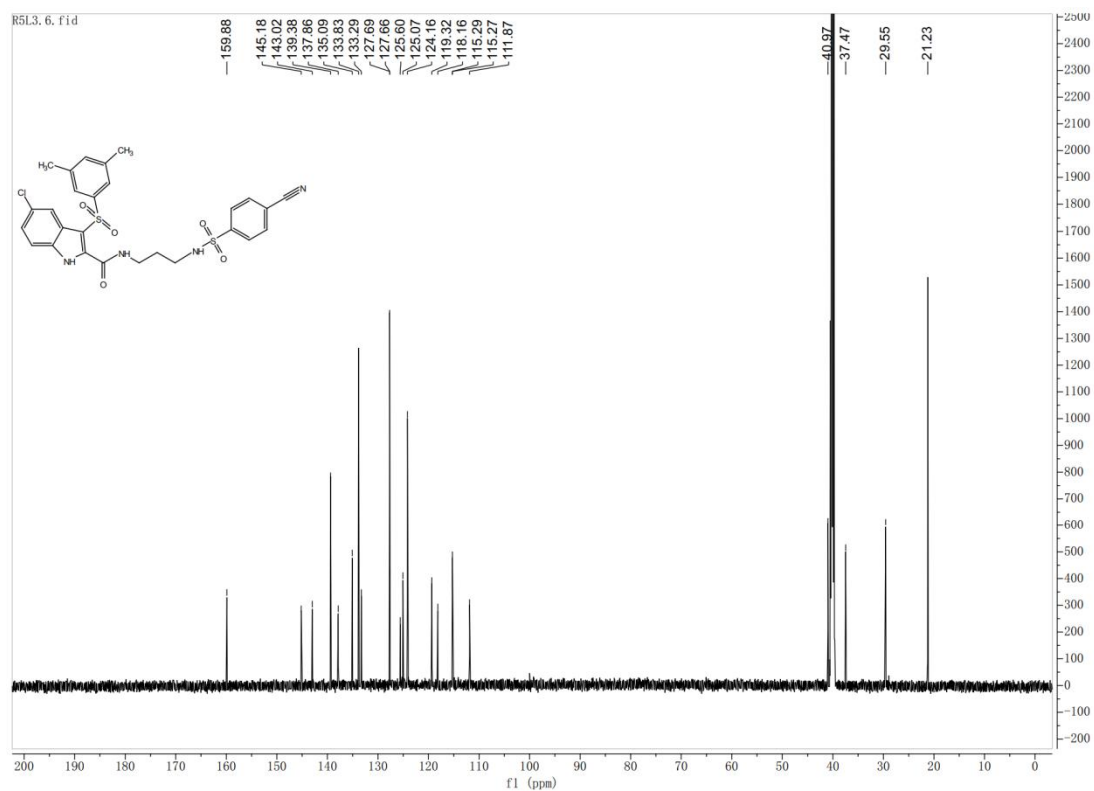

$^1\text{H}$  NMR (600 MHz,  $\text{DMSO}-d_6$ ) of **R<sub>5</sub>L<sub>4</sub>**

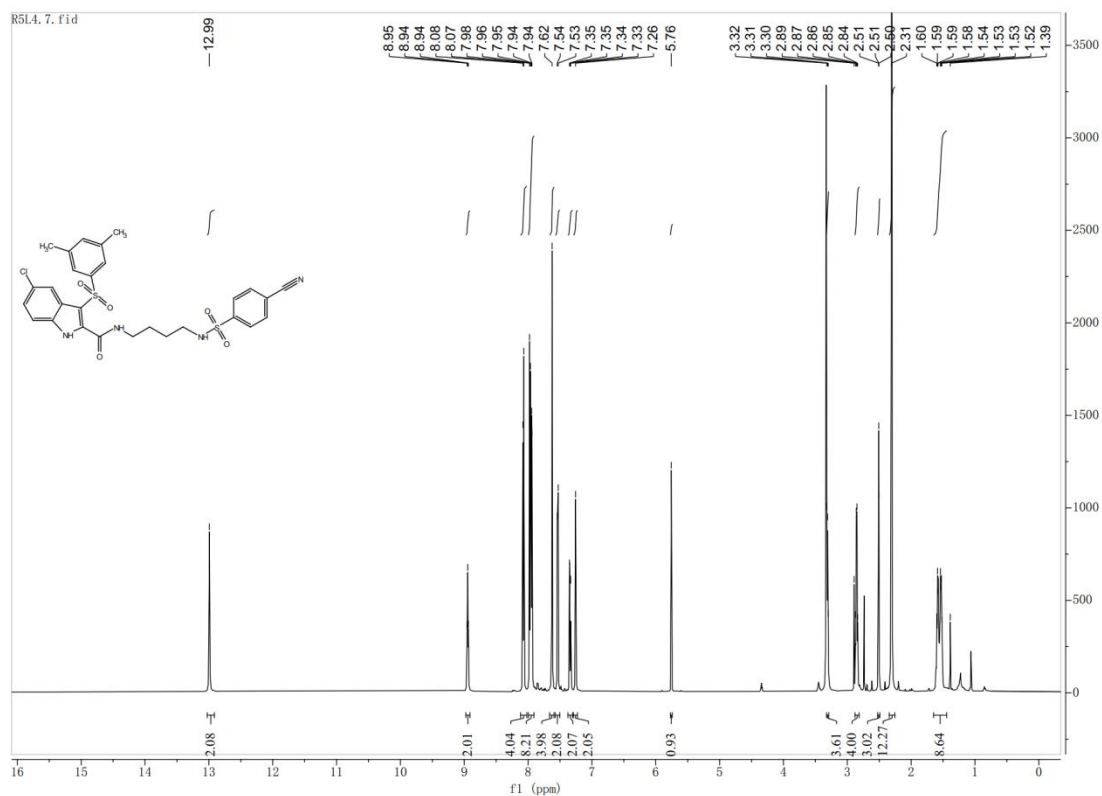

$^{13}\text{C}$  NMR (150 MHz,  $\text{DMSO}-d_6$ ) of **R<sub>5</sub>L<sub>4</sub>**

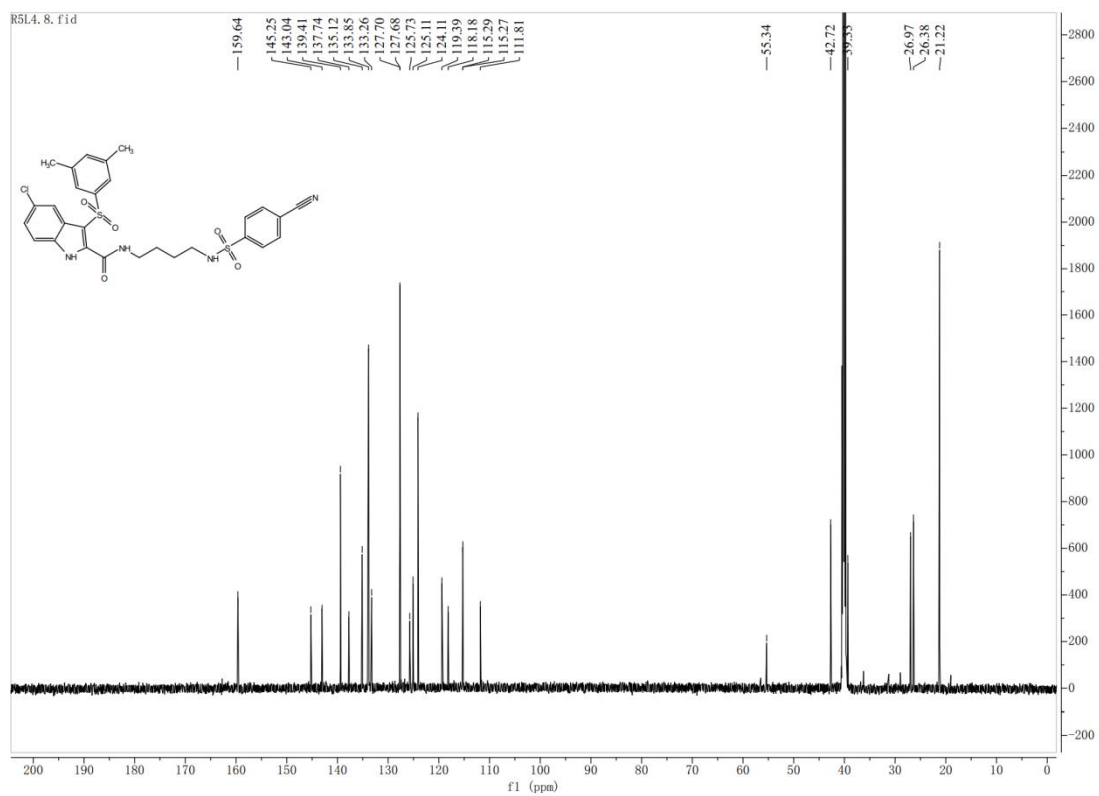

$^1\text{H}$  NMR (600 MHz,  $\text{DMSO-}d_6$ ) of **R<sub>5</sub>L<sub>5</sub>**

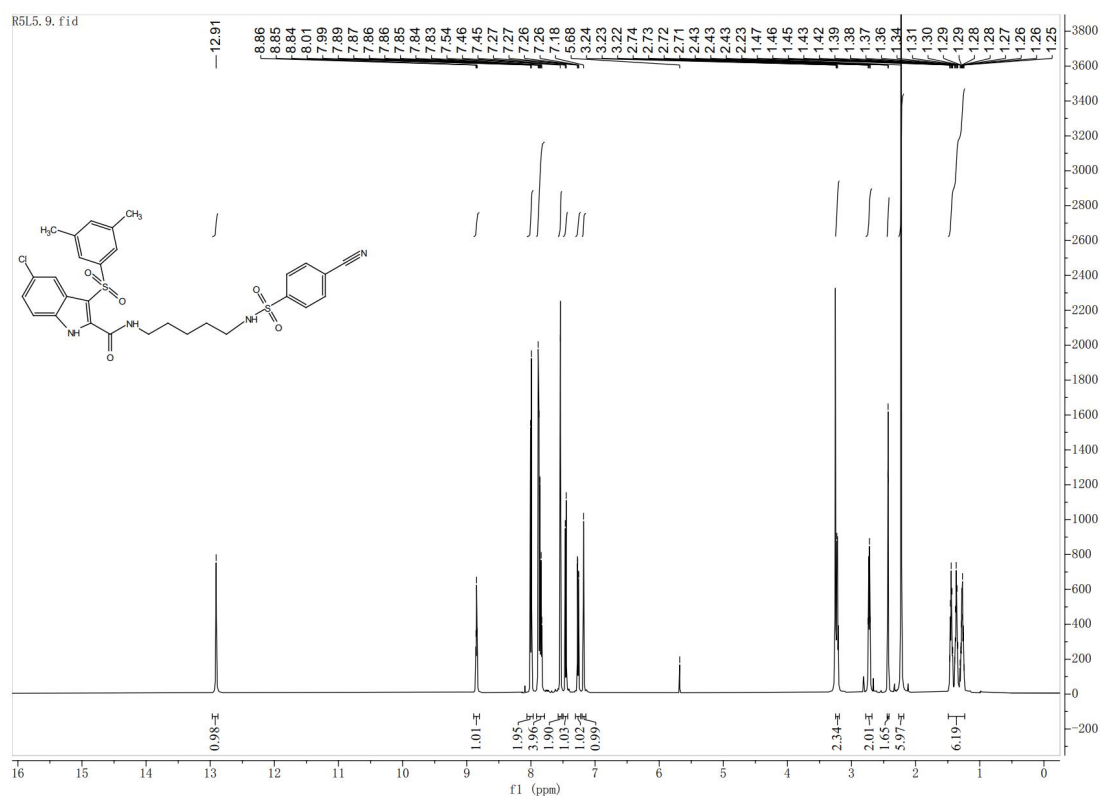

$^{13}\text{C}$  NMR (150 MHz,  $\text{DMSO-}d_6$ ) of **R<sub>5</sub>L<sub>5</sub>**

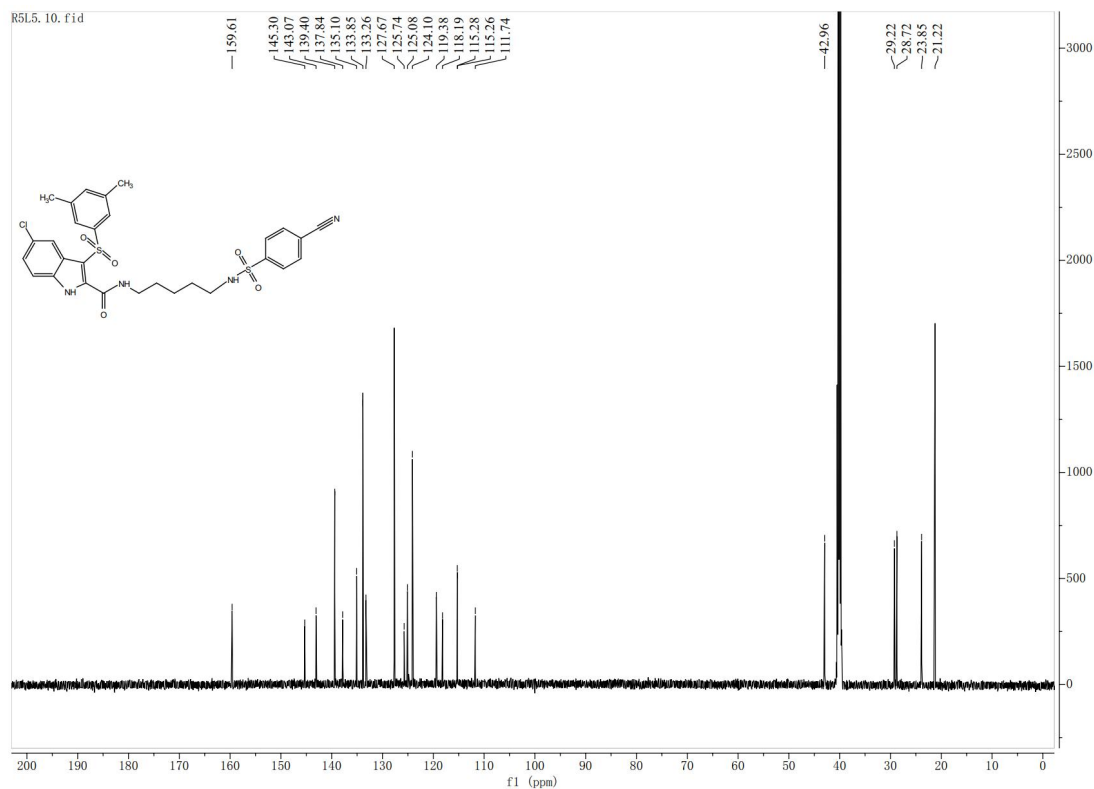

$^1\text{H}$  NMR (600 MHz,  $\text{DMSO-}d_6$ ) of  $\text{R}_6\text{L}_2$

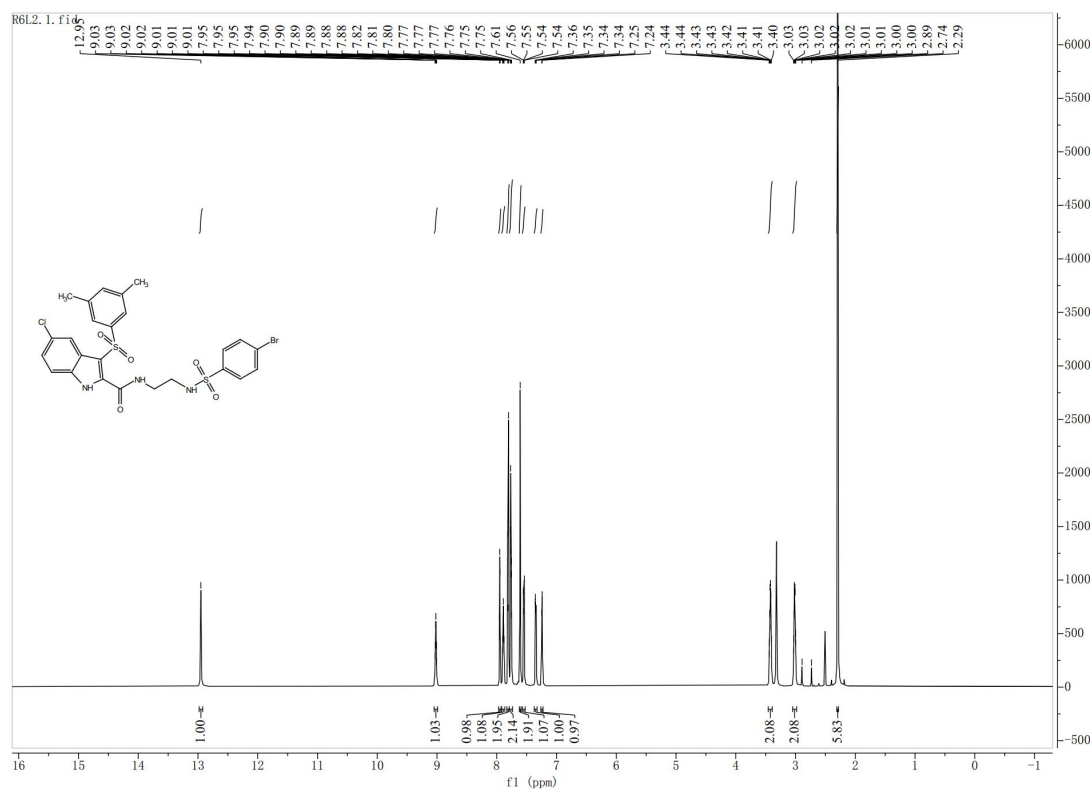

$^{13}\text{C}$  NMR (150 MHz,  $\text{DMSO-}d_6$ ) of  $\text{R}_6\text{L}_2$

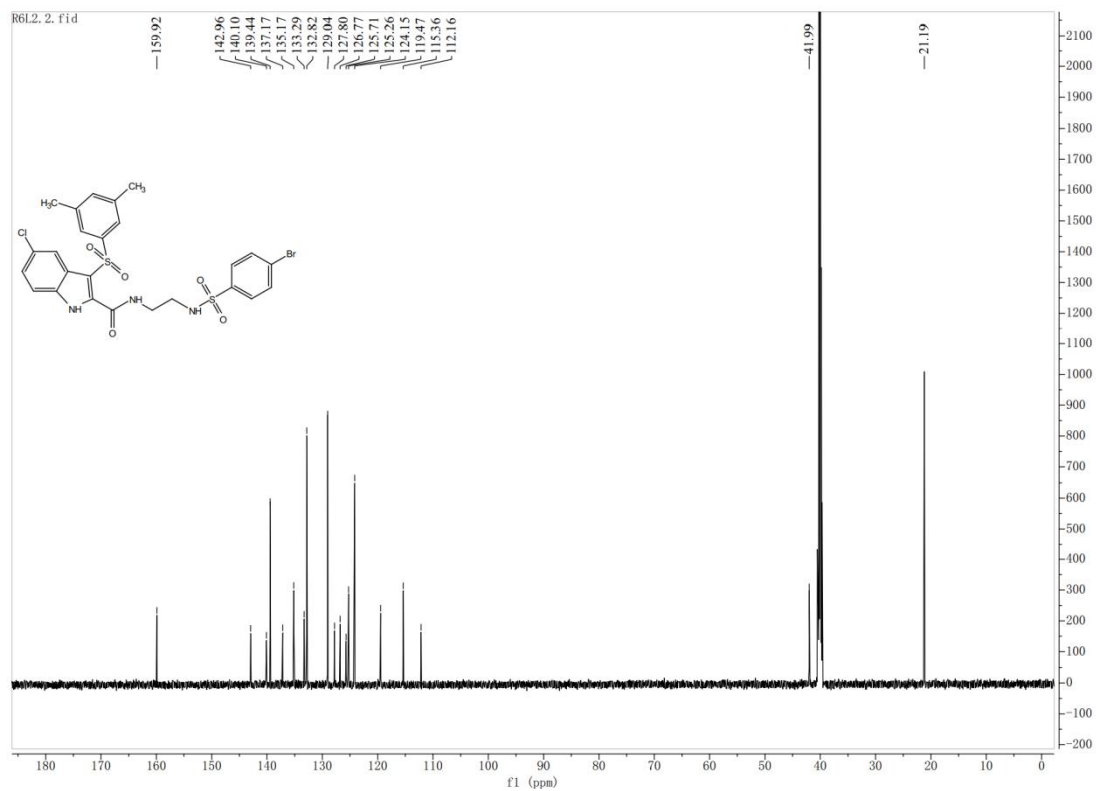

$^1\text{H}$  NMR (600 MHz,  $\text{DMSO-}d_6$ ) of  $\text{R}_6\text{L}_3$

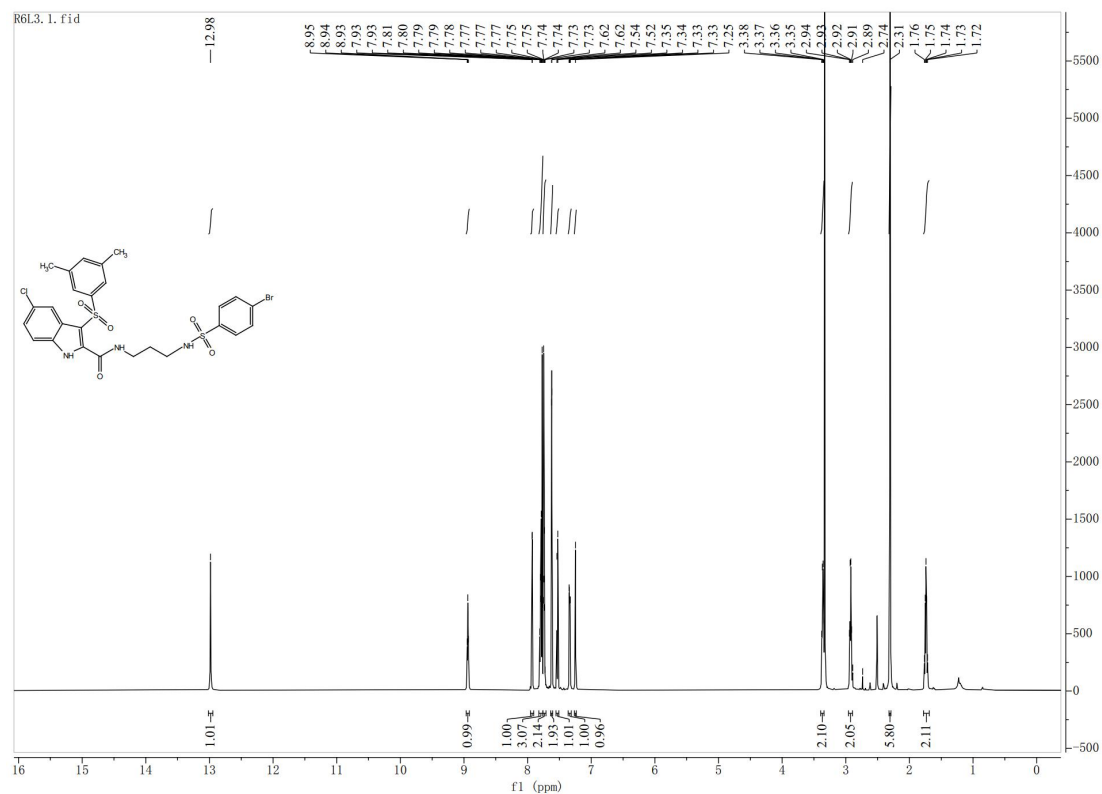

$^{13}\text{C}$  NMR (150 MHz,  $\text{DMSO-}d_6$ ) of  $\text{R}_6\text{L}_3$

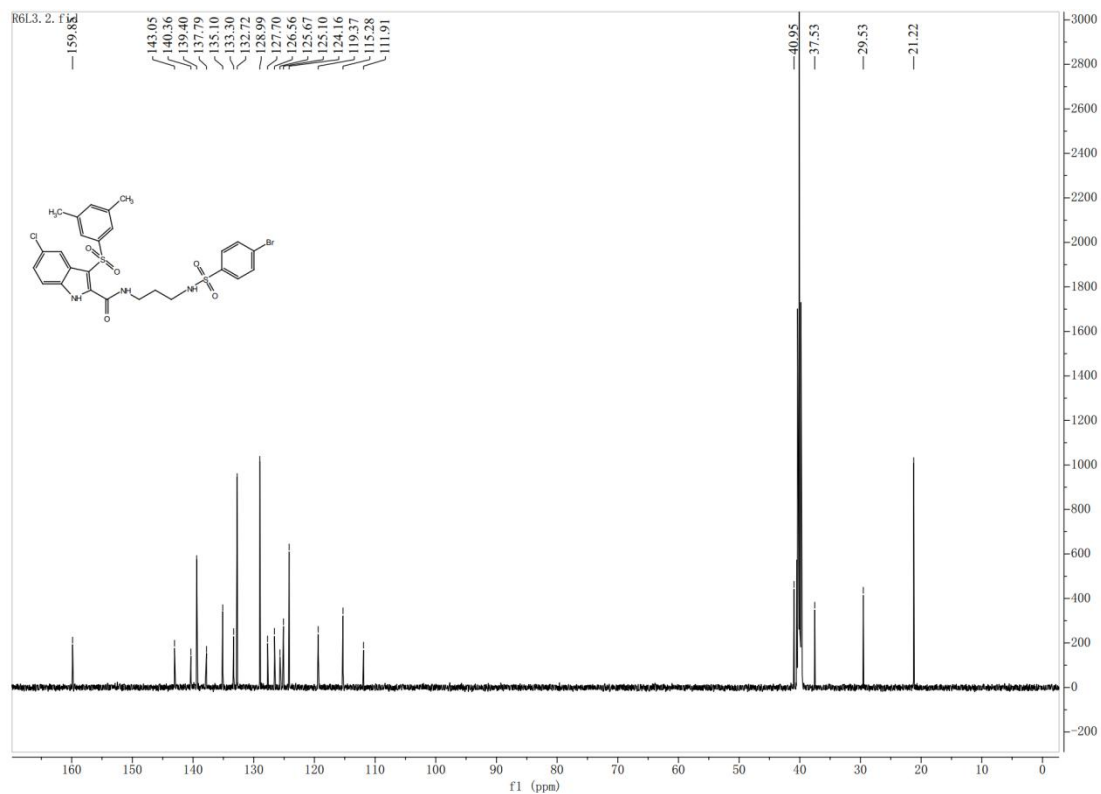

$^1\text{H}$  NMR (600 MHz,  $\text{DMSO-}d_6$ ) of **R<sub>6</sub>L<sub>4</sub>**

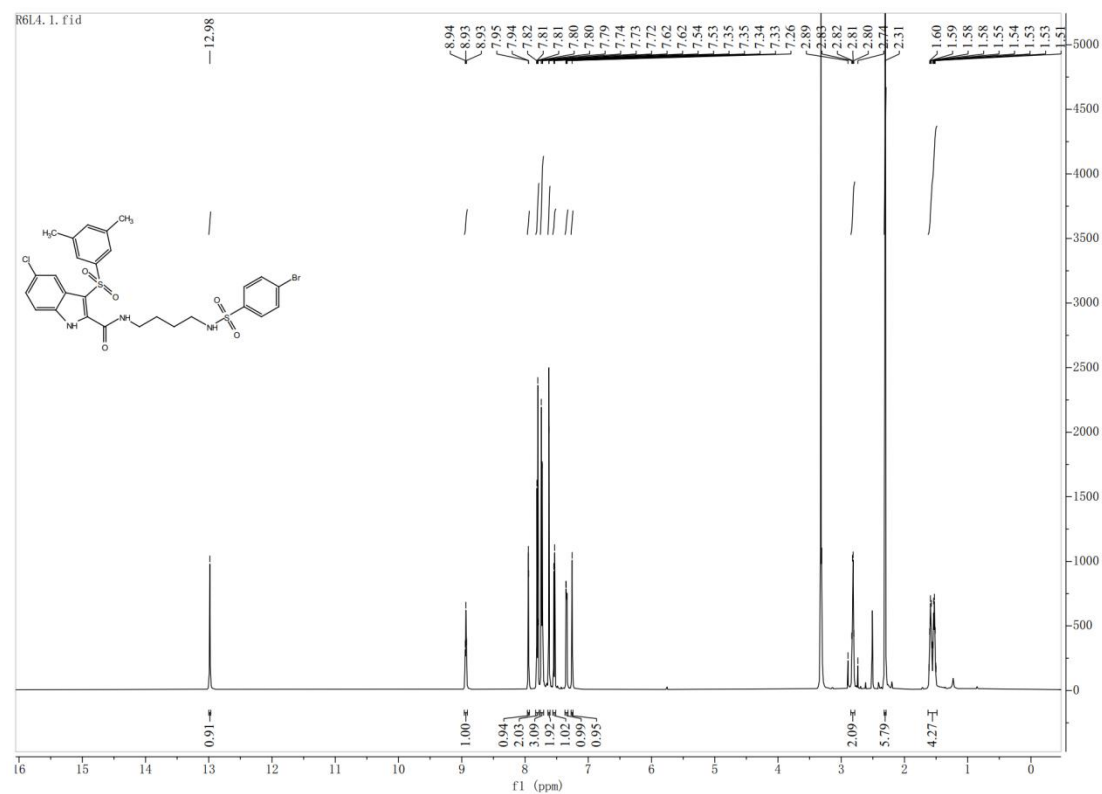

$^{13}\text{C}$  NMR (150 MHz,  $\text{DMSO-}d_6$ ) of **R<sub>6</sub>L<sub>4</sub>**

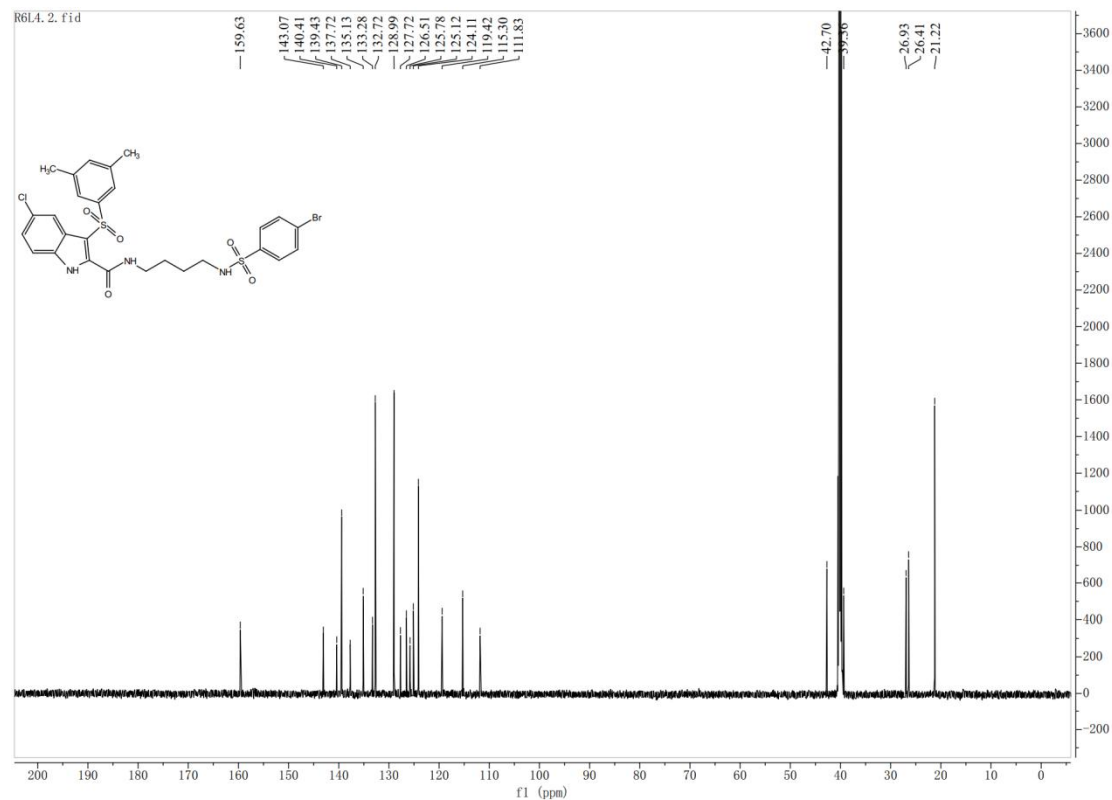

$^1\text{H}$  NMR (600 MHz,  $\text{DMSO}-d_6$ ) of  $\text{R}_6\text{L}_5$

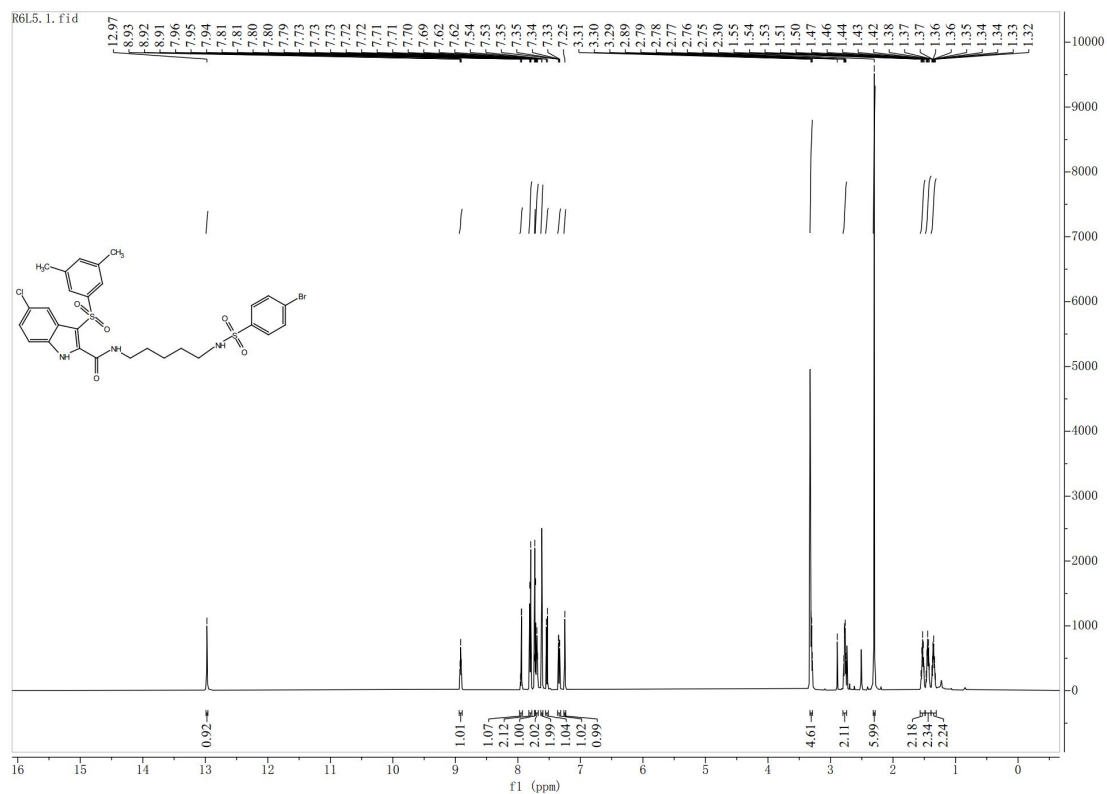

$^{13}\text{C}$  NMR (150 MHz,  $\text{DMSO}-d_6$ ) of  $\text{R}_6\text{L}_5$

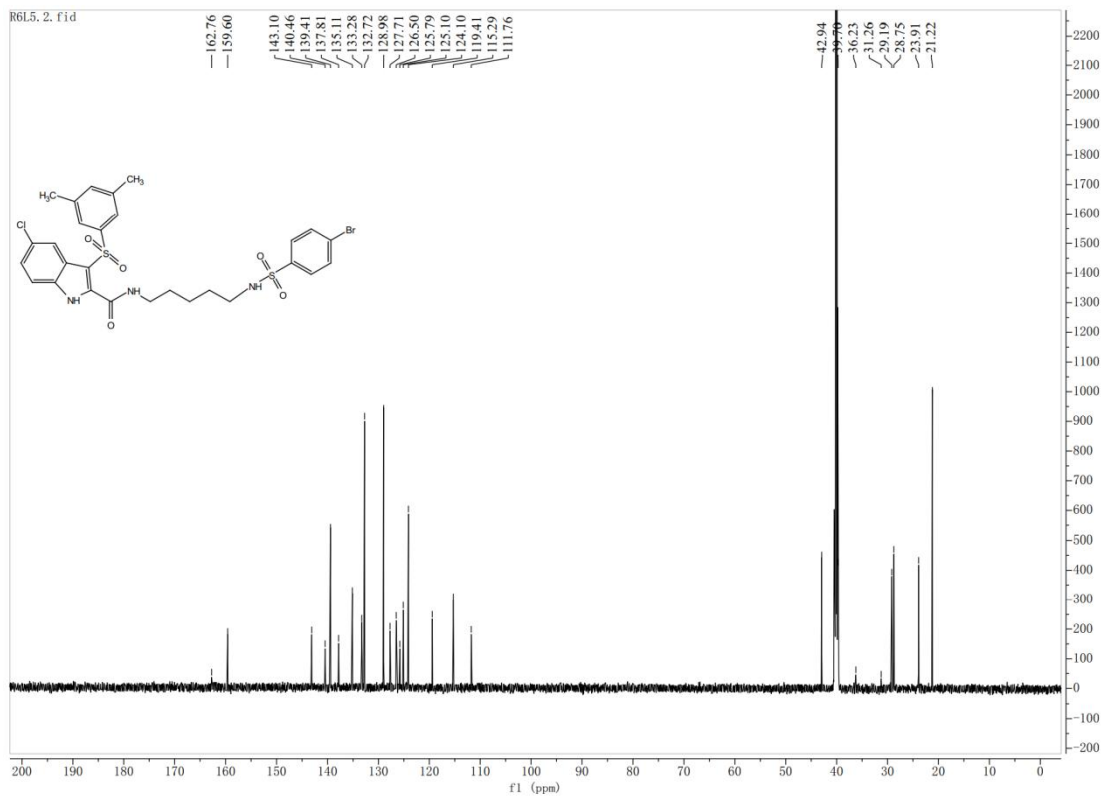

$^1\text{H}$  NMR (600 MHz,  $\text{DMSO}-d_6$ ) of  $\text{R}_7\text{L}_2$

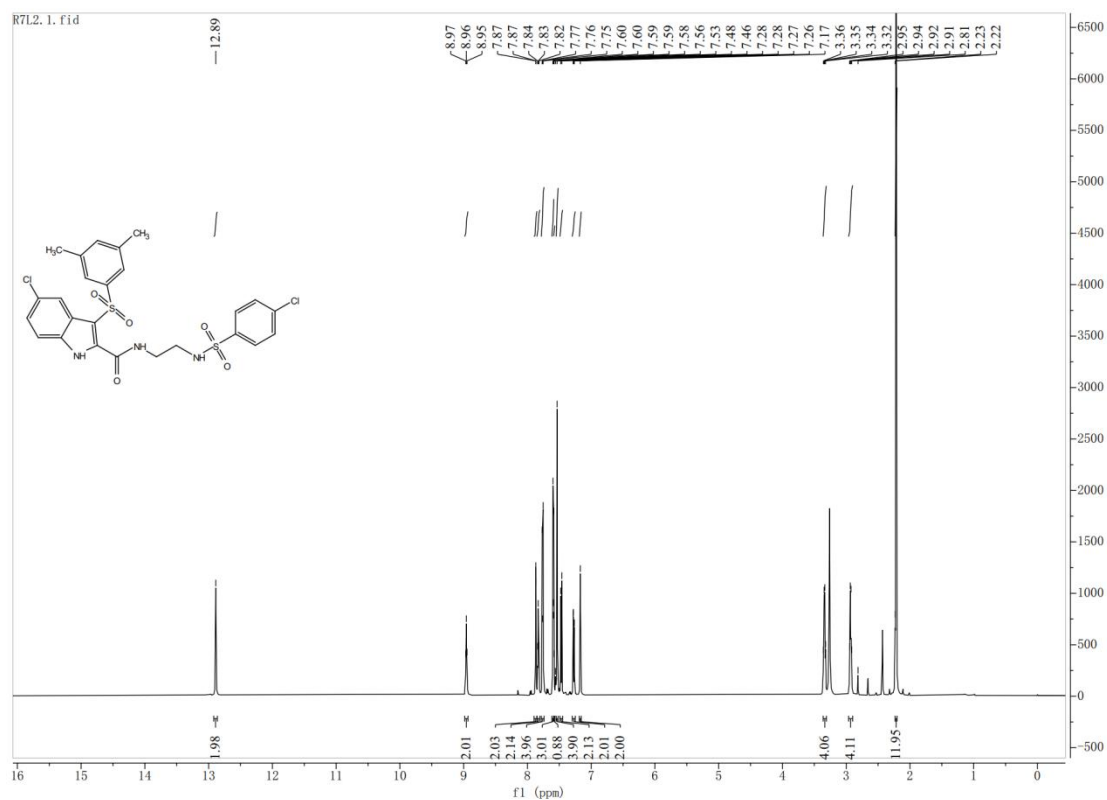

$^{13}\text{C}$  NMR (150 MHz,  $\text{DMSO}-d_6$ ) of  $\text{R}_7\text{L}_2$

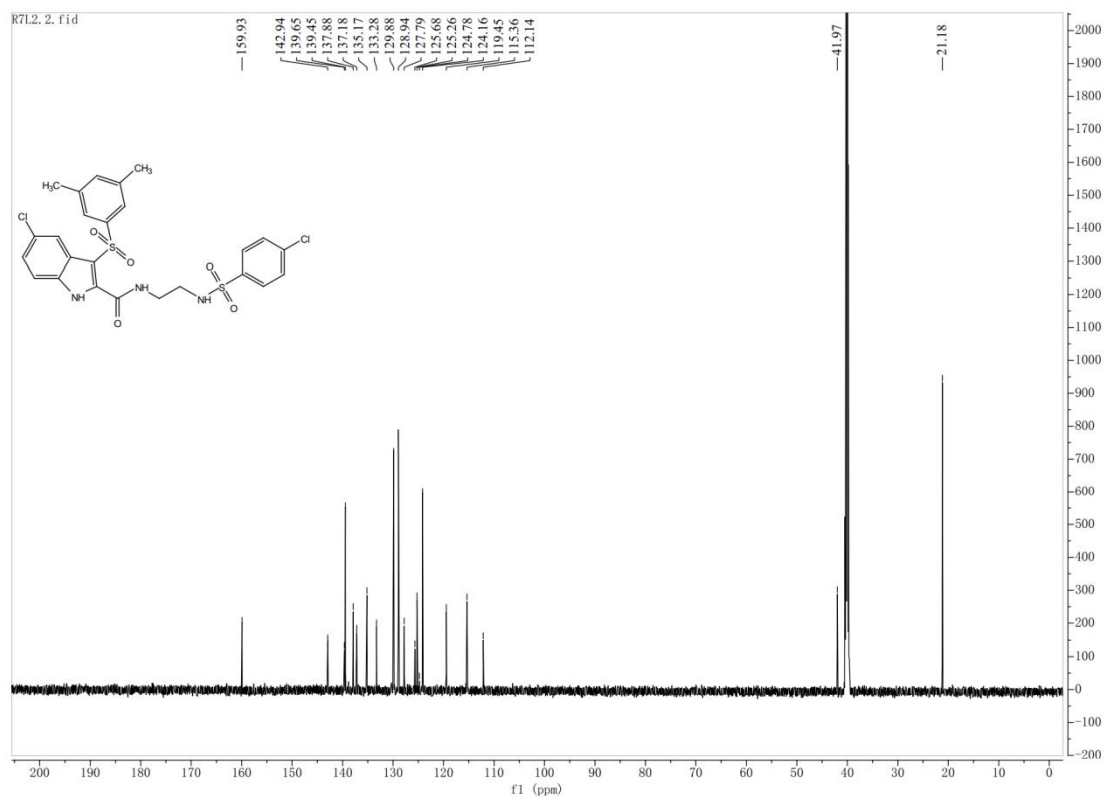

$^1\text{H}$  NMR (600 MHz, DMSO- $d_6$ ) of **R<sub>7</sub>L<sub>3</sub>**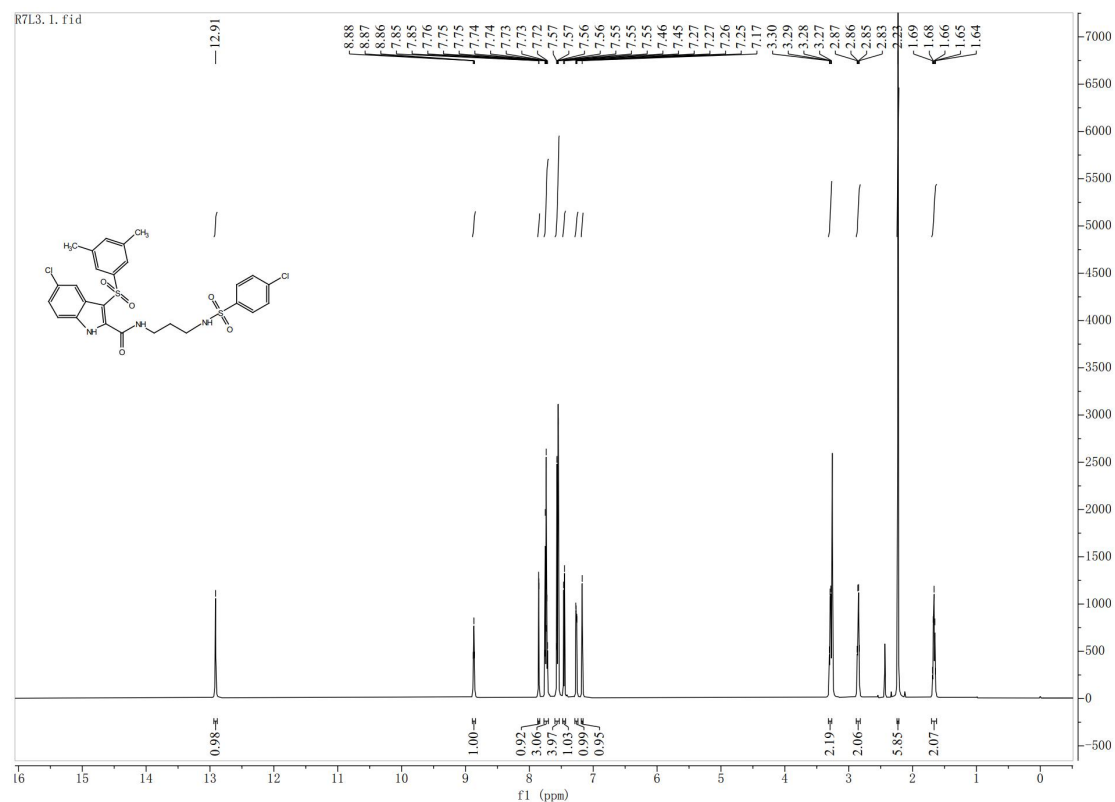 $^{13}\text{C}$  NMR (150 MHz, DMSO-*d*<sub>6</sub>) of **R<sub>7</sub>L<sub>3</sub>**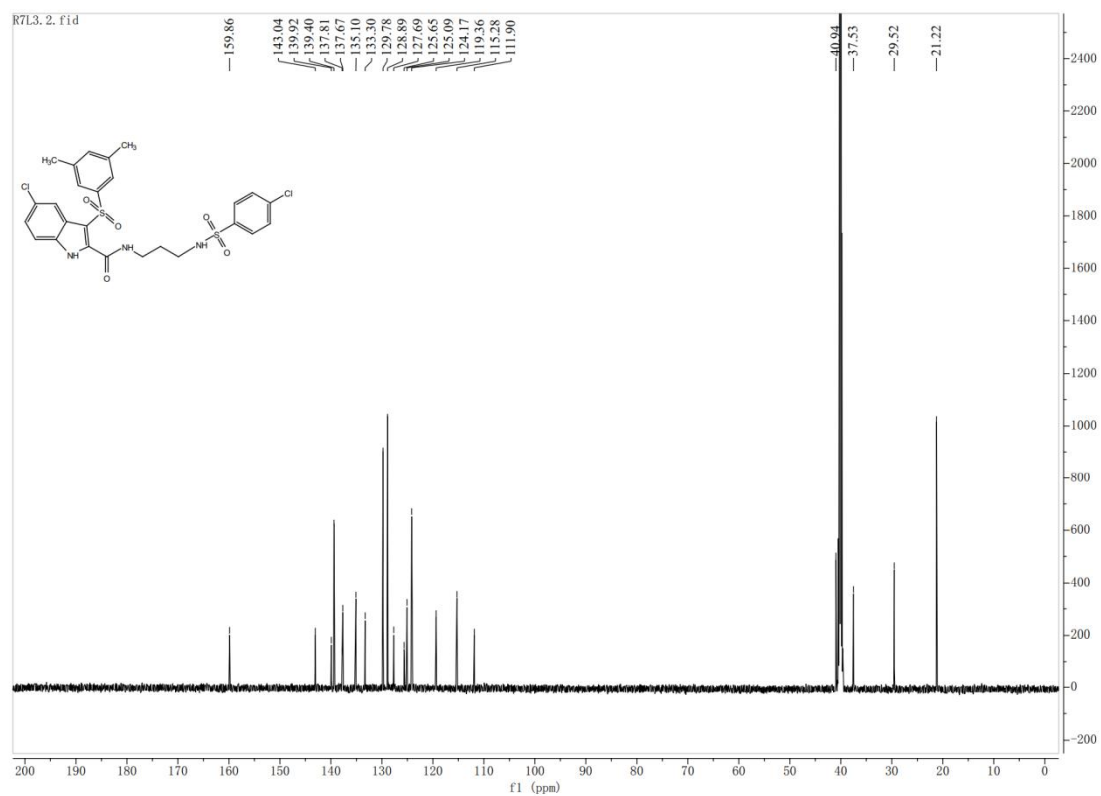

$^1\text{H}$  NMR (600 MHz,  $\text{DMSO}-d_6$ ) of **R<sub>7</sub>L<sub>4</sub>**

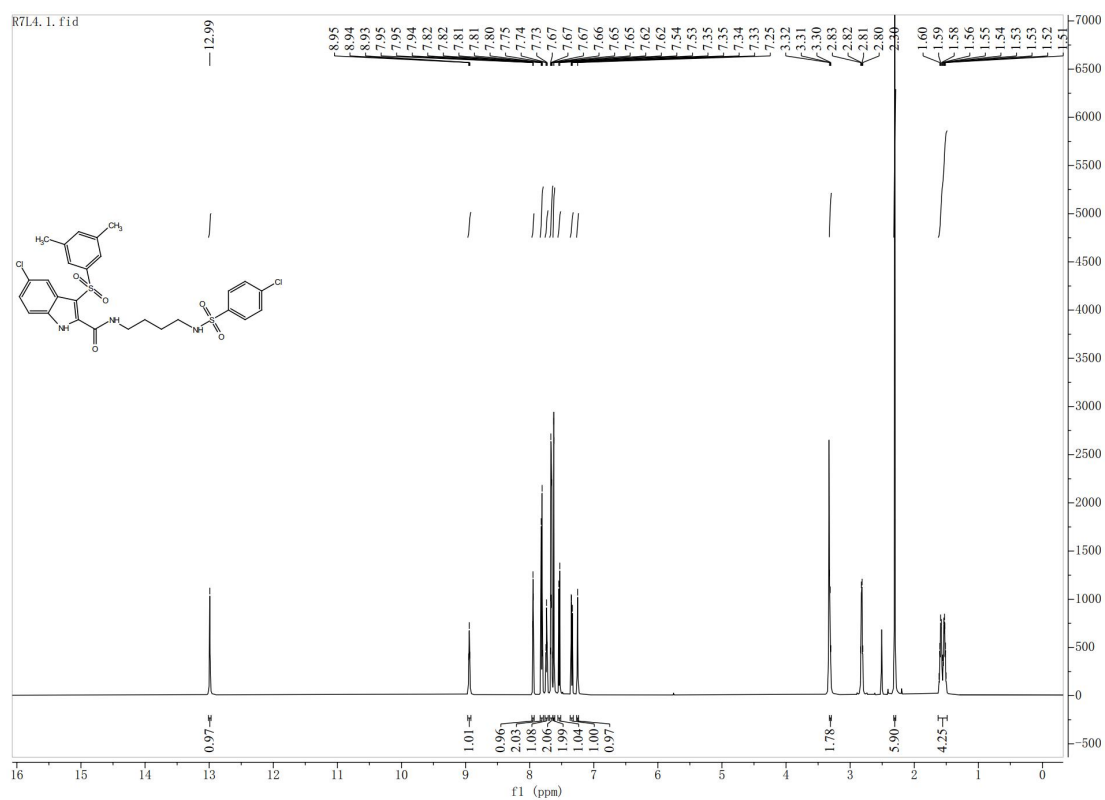

$^{13}\text{C}$  NMR (150 MHz,  $\text{DMSO}-d_6$ ) of **R<sub>7</sub>L<sub>4</sub>**

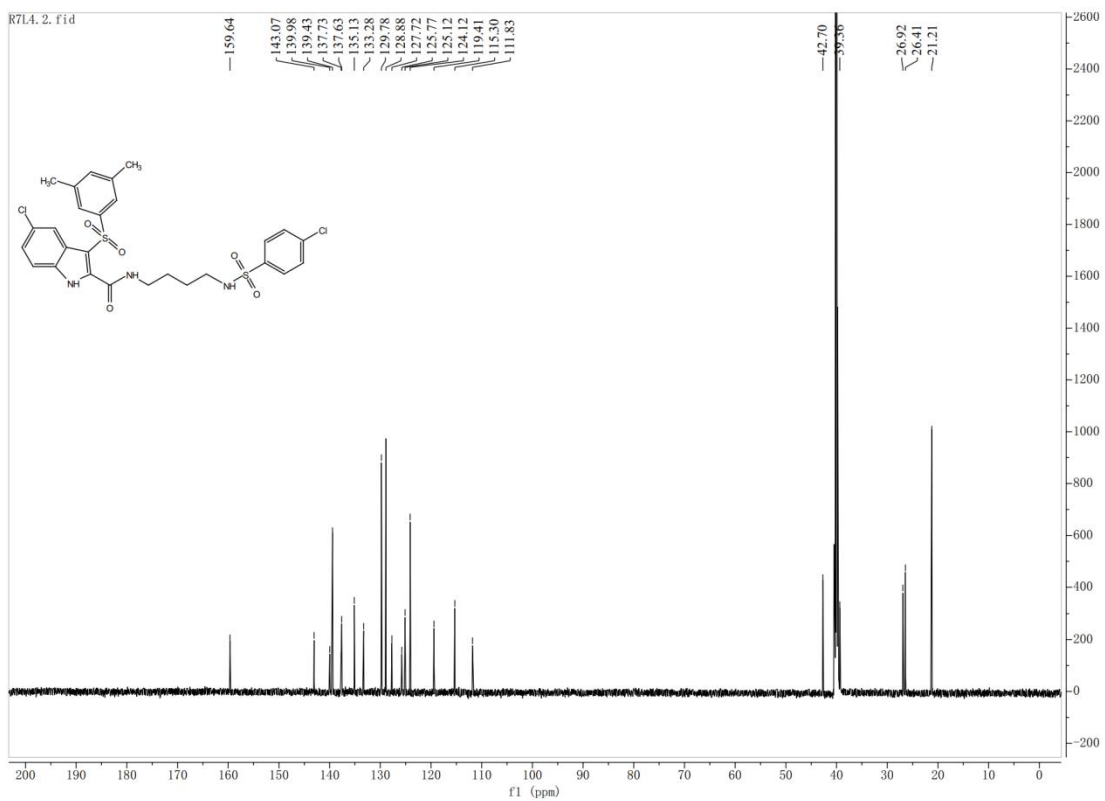

$^1\text{H}$  NMR (600 MHz, DMSO- $d_6$ ) of **R<sub>7</sub>L<sub>5</sub>**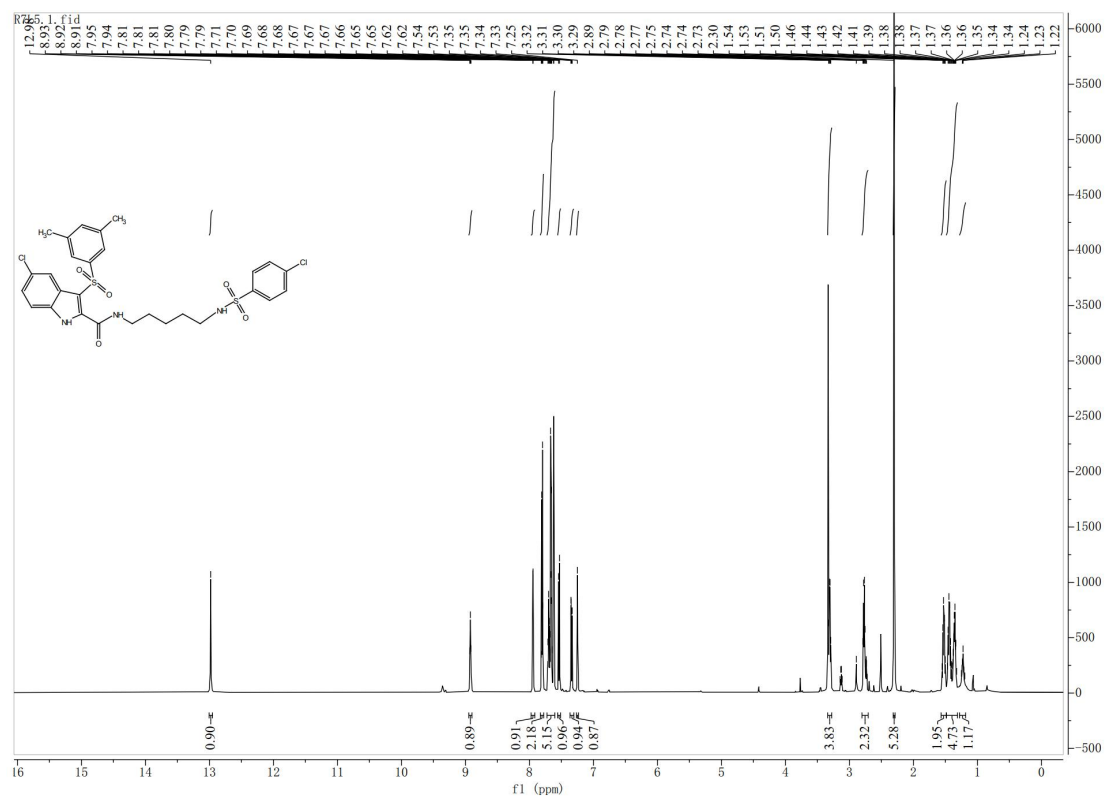 $^{13}\text{C}$  NMR (150 MHz, DMSO- $d_6$ ) of **R<sub>7</sub>L<sub>5</sub>**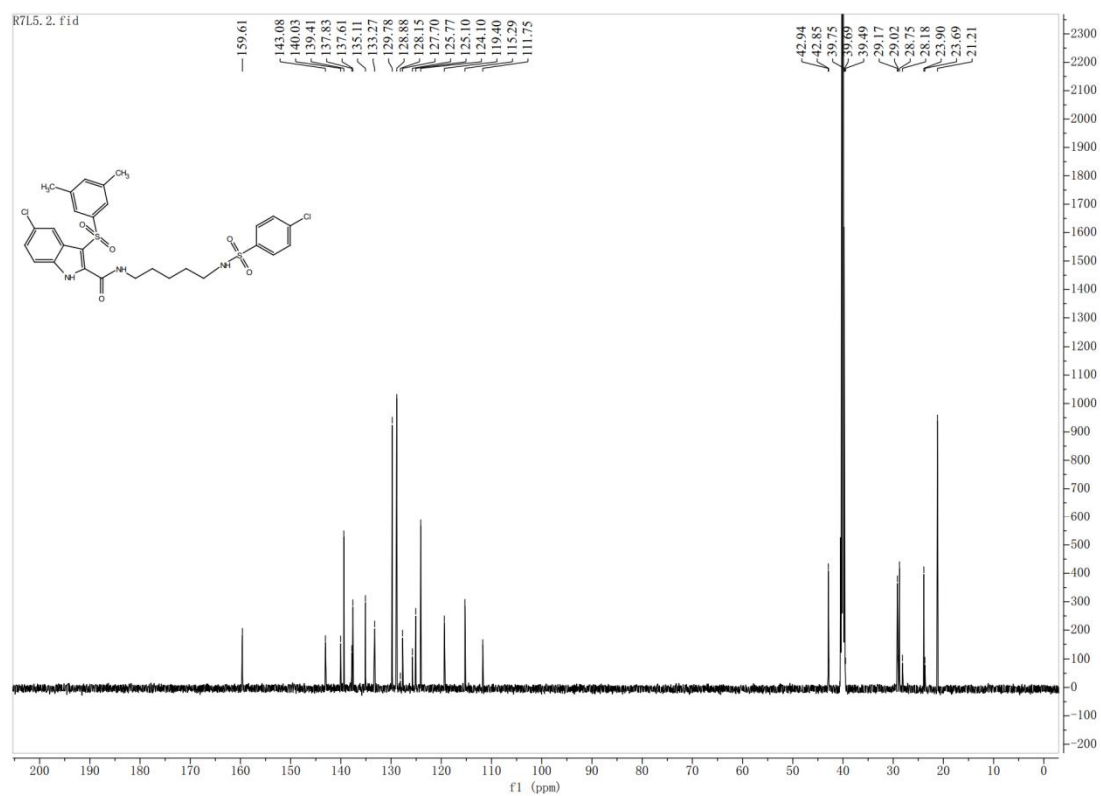

$^1\text{H}$  NMR (600 MHz,  $\text{DMSO-}d_6$ ) of **R<sub>8</sub>L<sub>2</sub>**

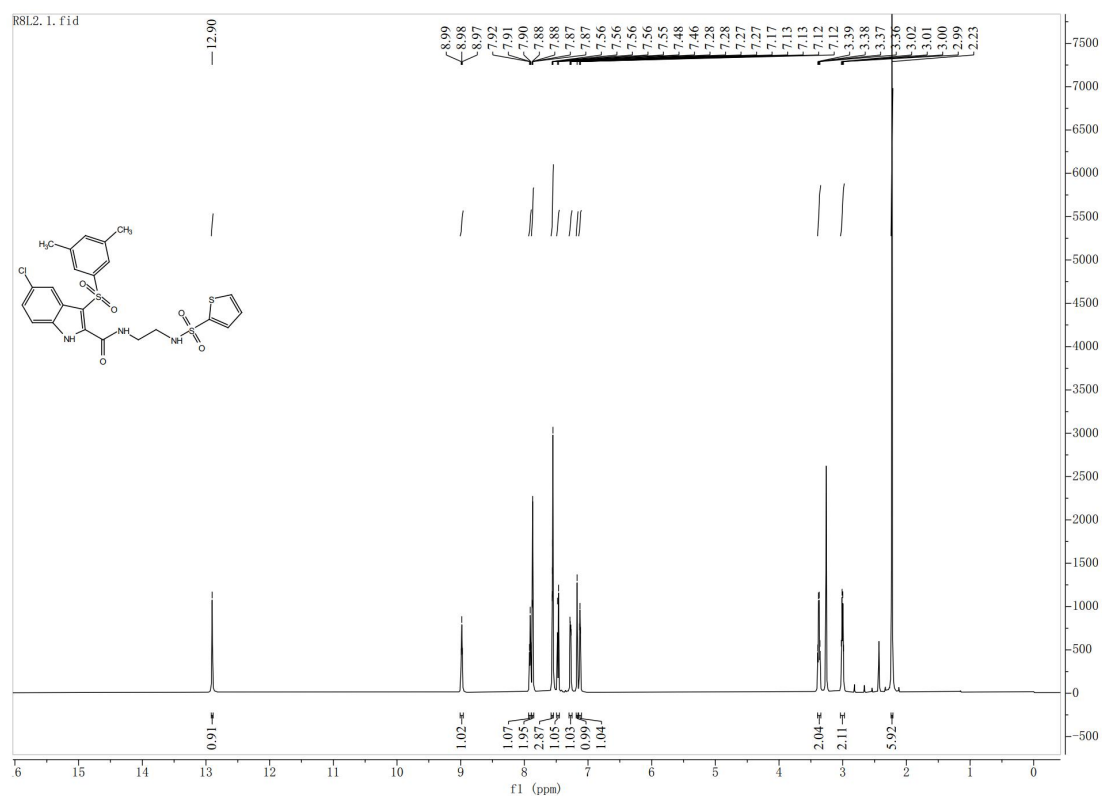

$^{13}\text{C}$  NMR (150 MHz,  $\text{DMSO-}d_6$ ) of **R<sub>8</sub>L<sub>2</sub>**

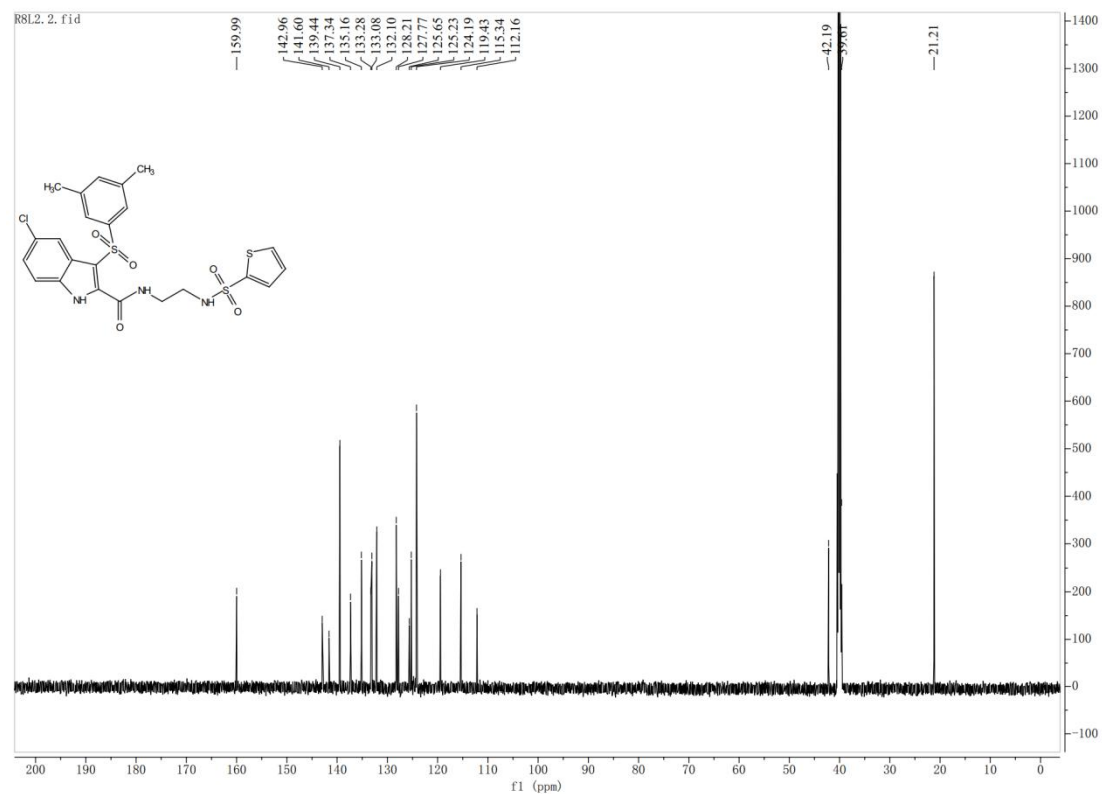

$^1\text{H}$  NMR (600 MHz,  $\text{DMSO}-d_6$ ) of **R<sub>8</sub>L<sub>3</sub>**

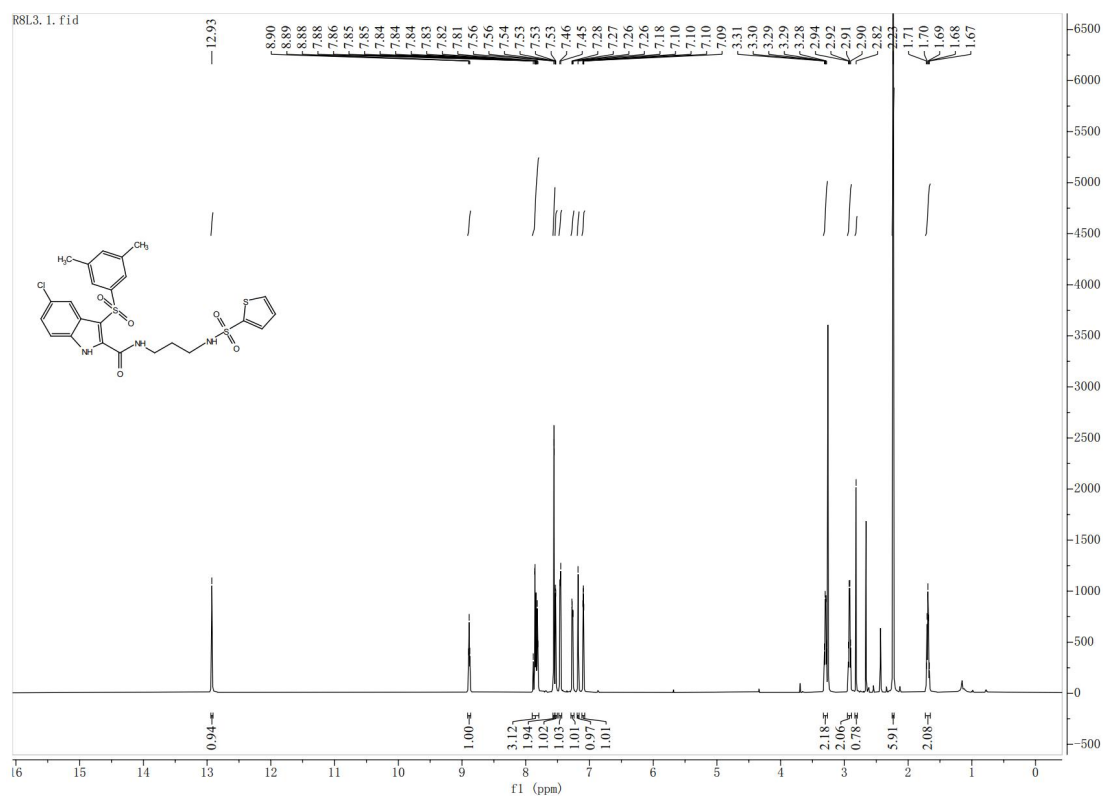

$^{13}\text{C}$  NMR (150 MHz,  $\text{DMSO}-d_6$ ) of **R<sub>8</sub>L<sub>3</sub>**

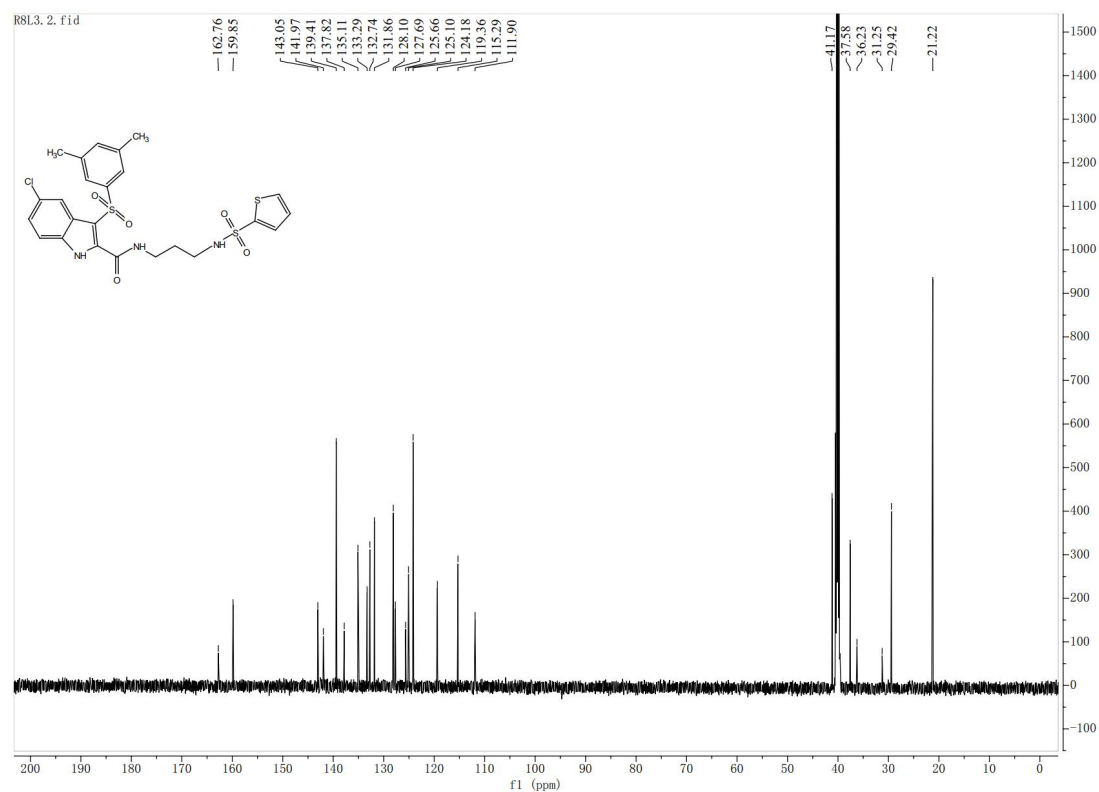

$^1\text{H}$  NMR (600 MHz,  $\text{DMSO}-d_6$ ) of **R<sub>8</sub>L<sub>4</sub>**

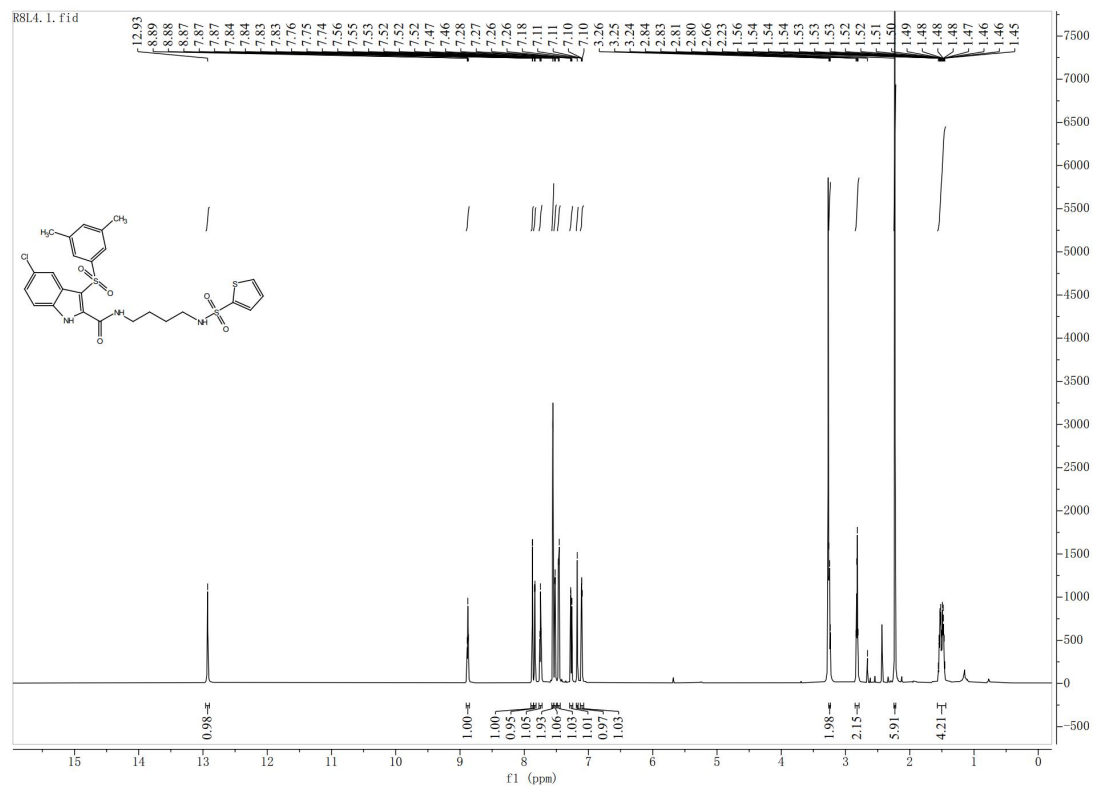

$^{13}\text{C}$  NMR (150 MHz,  $\text{DMSO}-d_6$ ) of **R<sub>8</sub>L<sub>4</sub>**

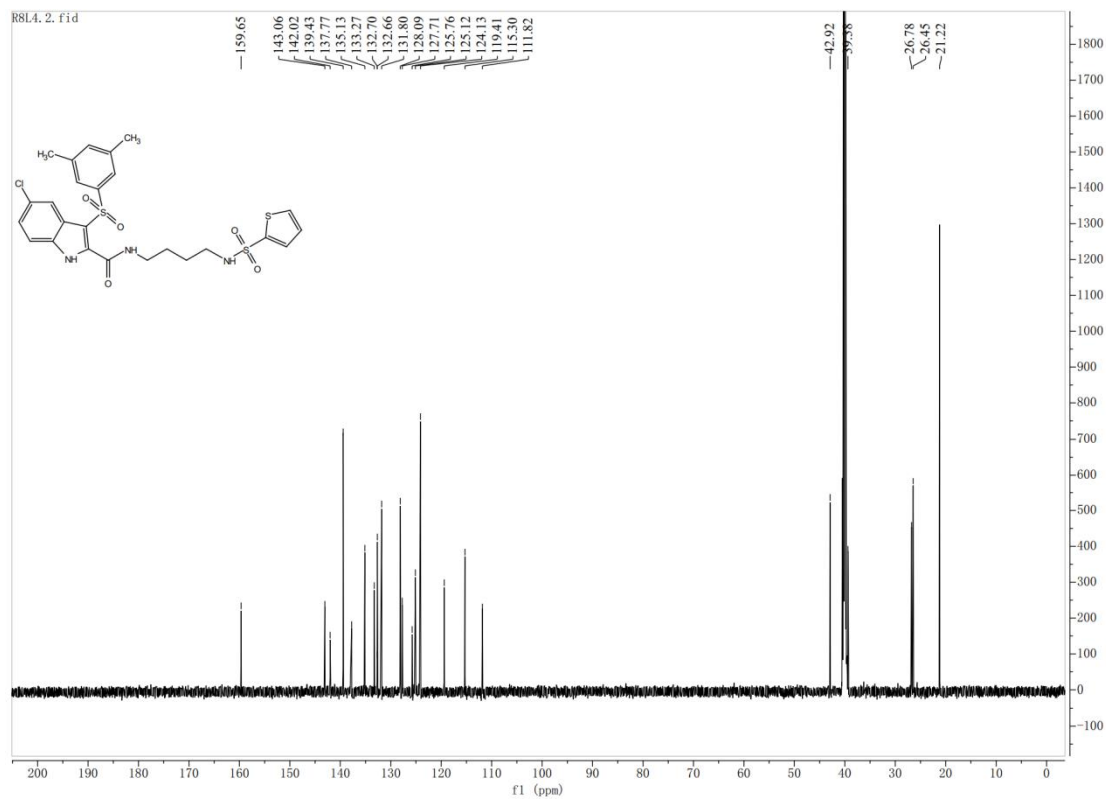

$^1\text{H}$  NMR (600 MHz,  $\text{DMSO}-d_6$ ) of **R<sub>8</sub>L<sub>5</sub>**

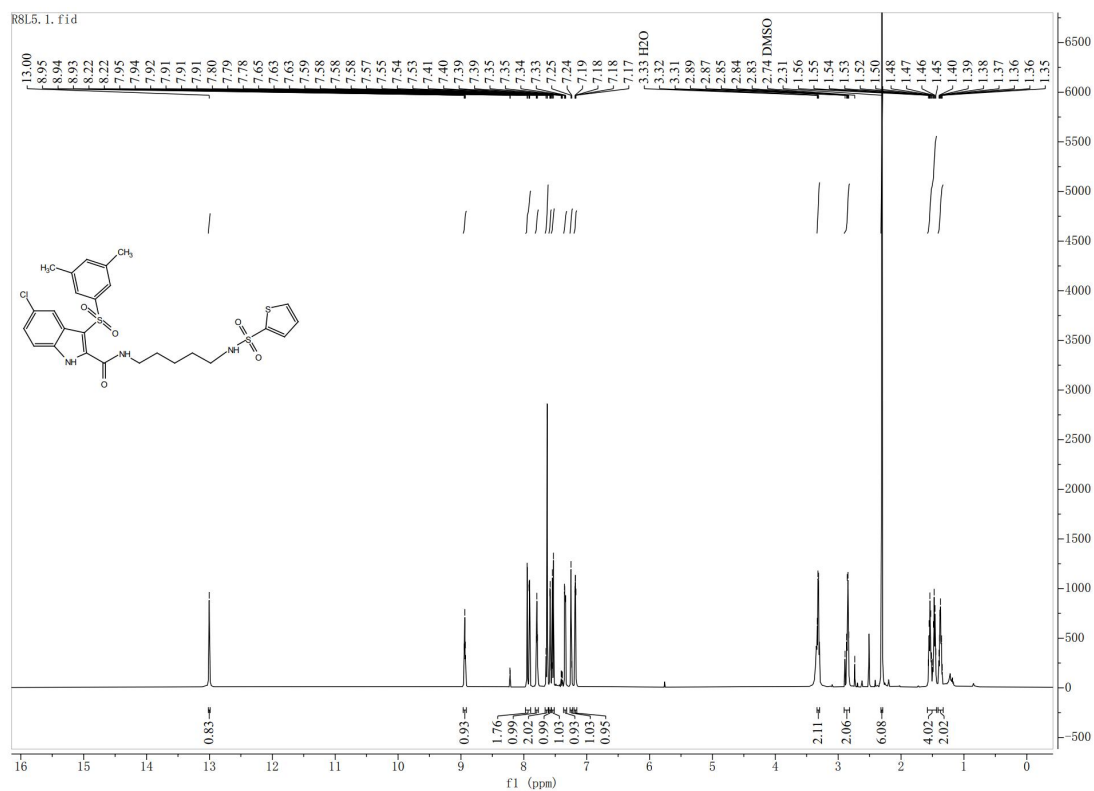

$^{13}\text{C}$  NMR (150 MHz,  $\text{DMSO}-d_6$ ) of **R<sub>8</sub>L<sub>5</sub>**

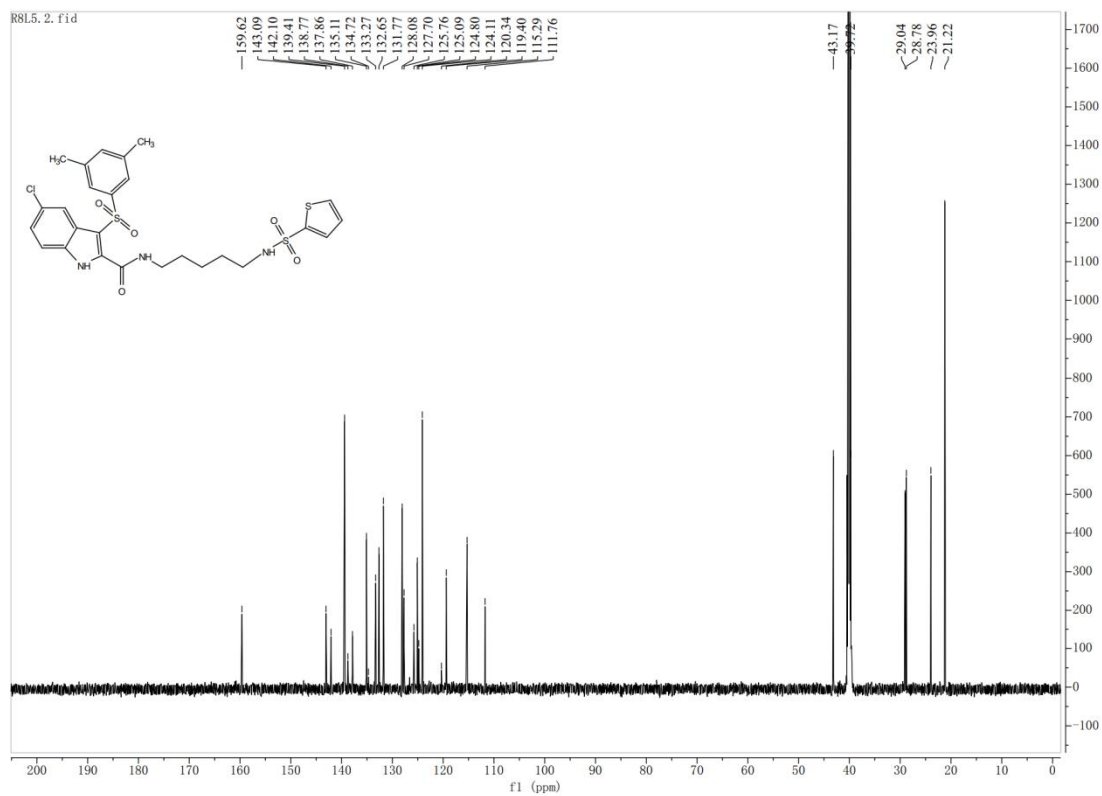

$^1\text{H}$  NMR (600 MHz,  $\text{DMSO-}d_6$ ) of  $\text{R}_9\text{L}_2$

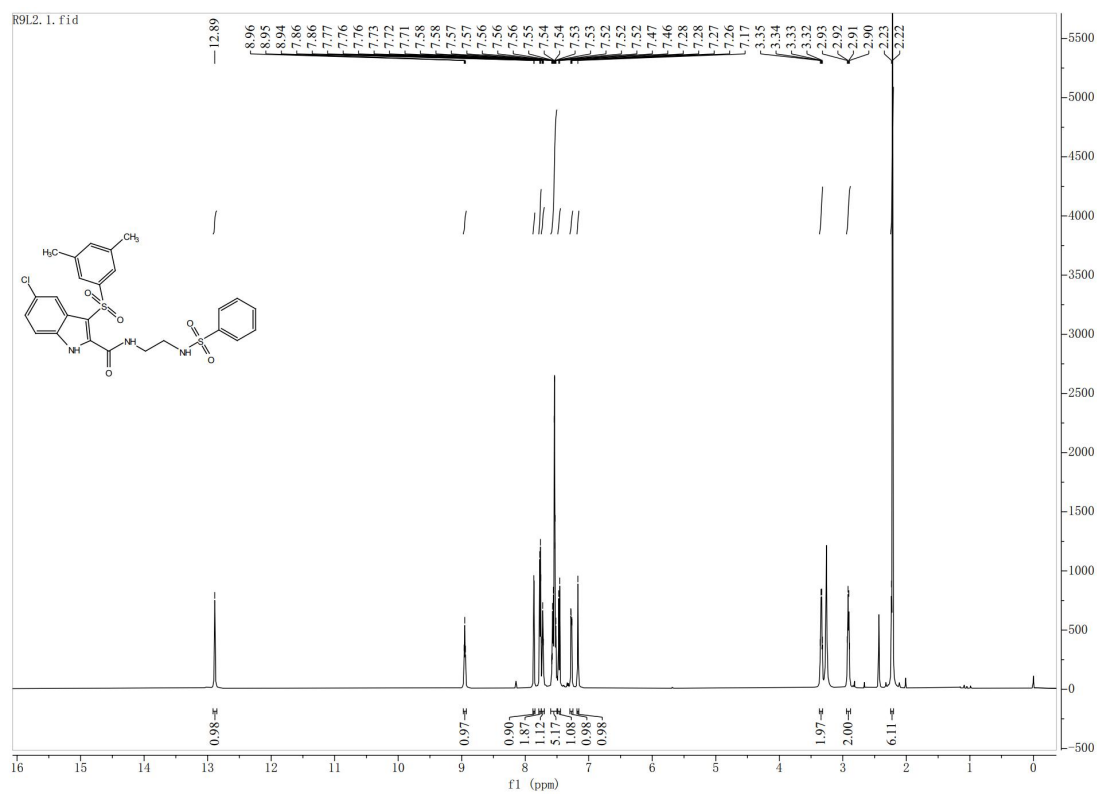

$^{13}\text{C}$  NMR (150 MHz,  $\text{DMSO-}d_6$ ) of  $\text{R}_9\text{L}_2$

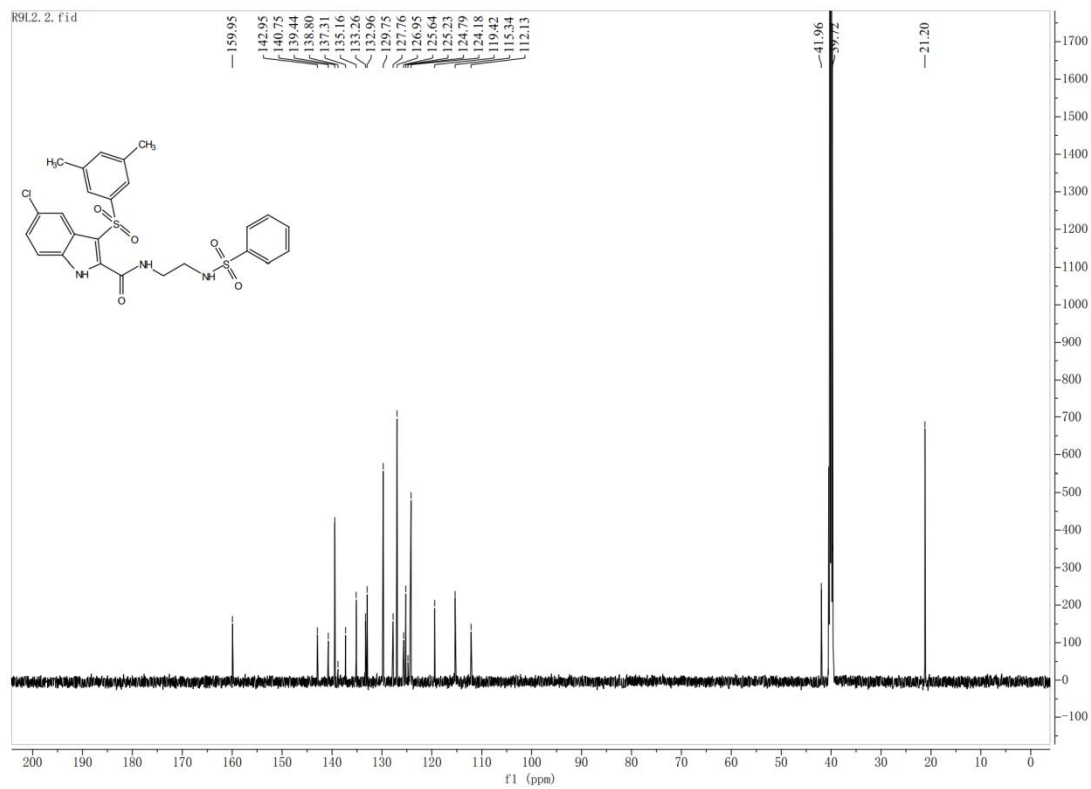

$^1\text{H}$  NMR (600 MHz, DMSO- $d_6$ ) of **R<sub>9</sub>L<sub>3</sub>**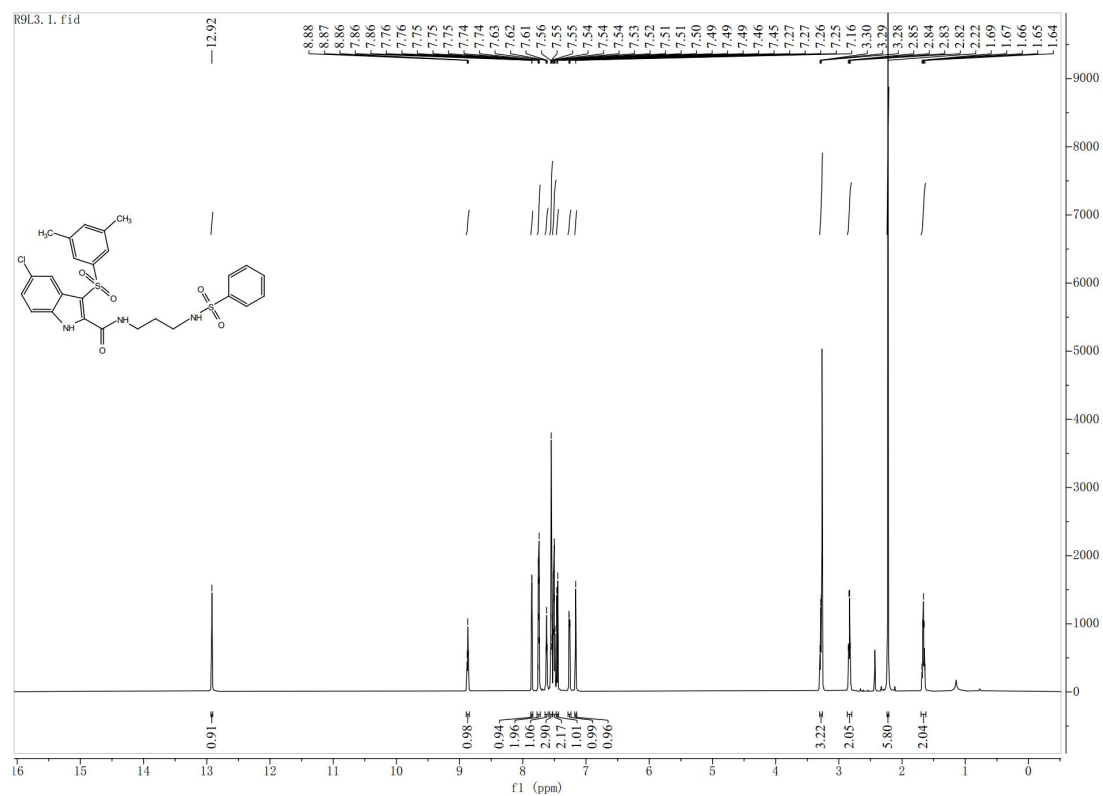 $^{13}\text{C}$  NMR (150 MHz, DMSO- $d_6$ ) of **R<sub>9</sub>L<sub>3</sub>**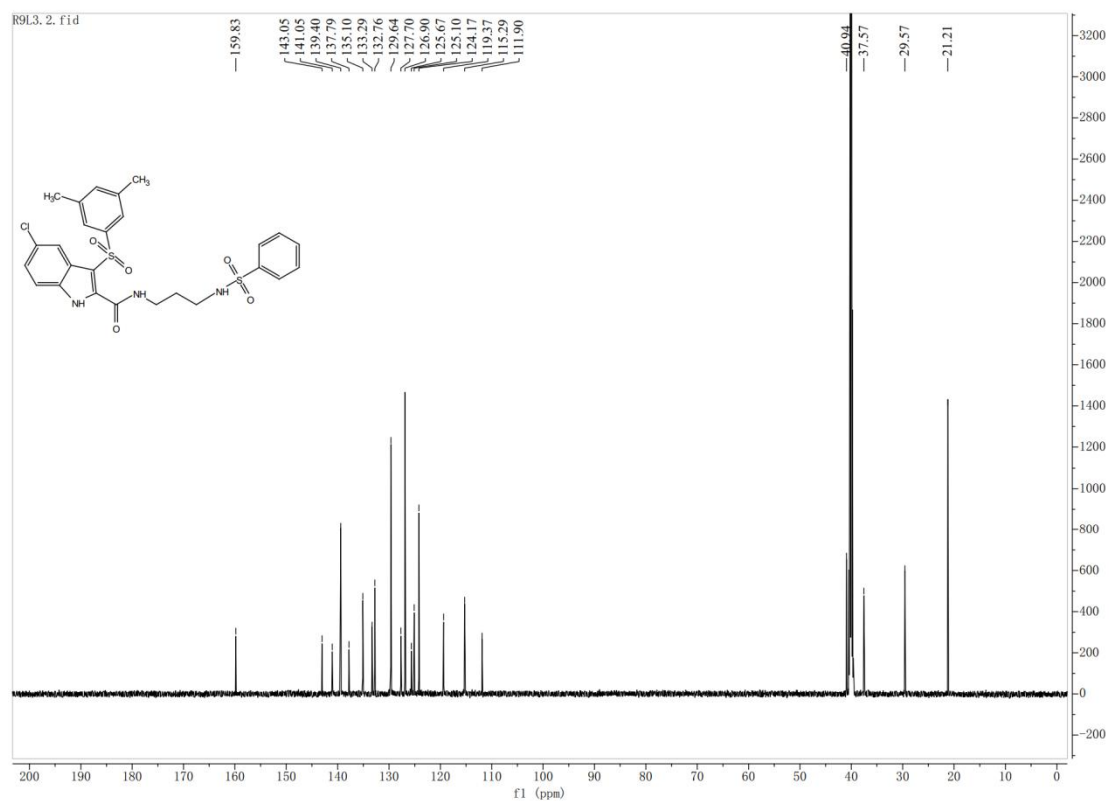

$^1\text{H}$  NMR (600 MHz,  $\text{DMSO-}d_6$ ) of **R<sub>9</sub>L<sub>4</sub>**

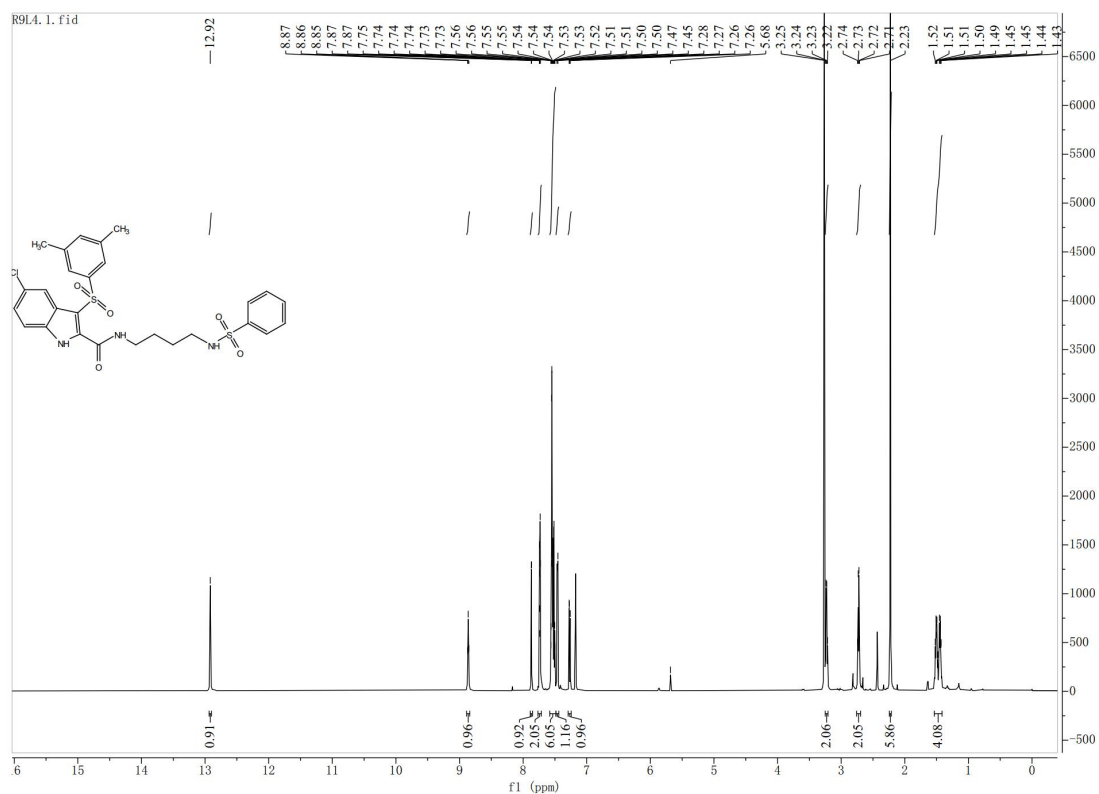

$^{13}\text{C}$  NMR (150 MHz,  $\text{DMSO-}d_6$ ) of **R<sub>9</sub>L<sub>4</sub>**

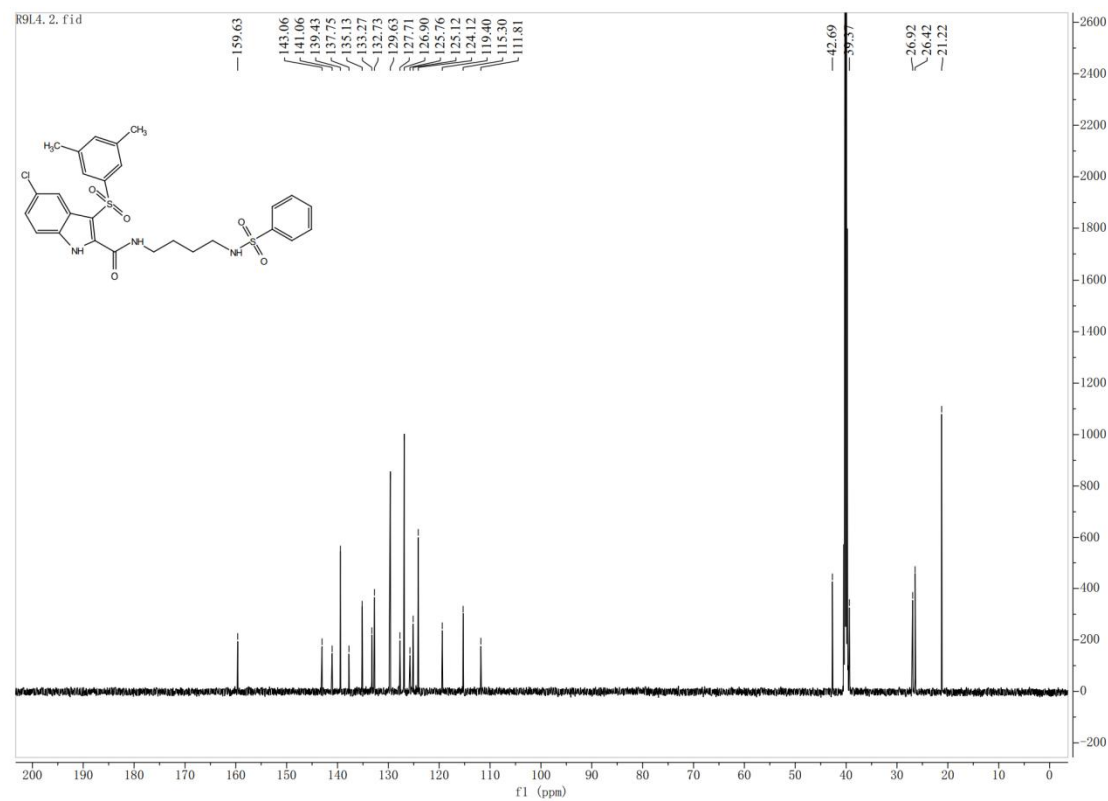

$^1\text{H}$  NMR (600 MHz,  $\text{DMSO}-d_6$ ) of **R<sub>9</sub>L<sub>5</sub>**

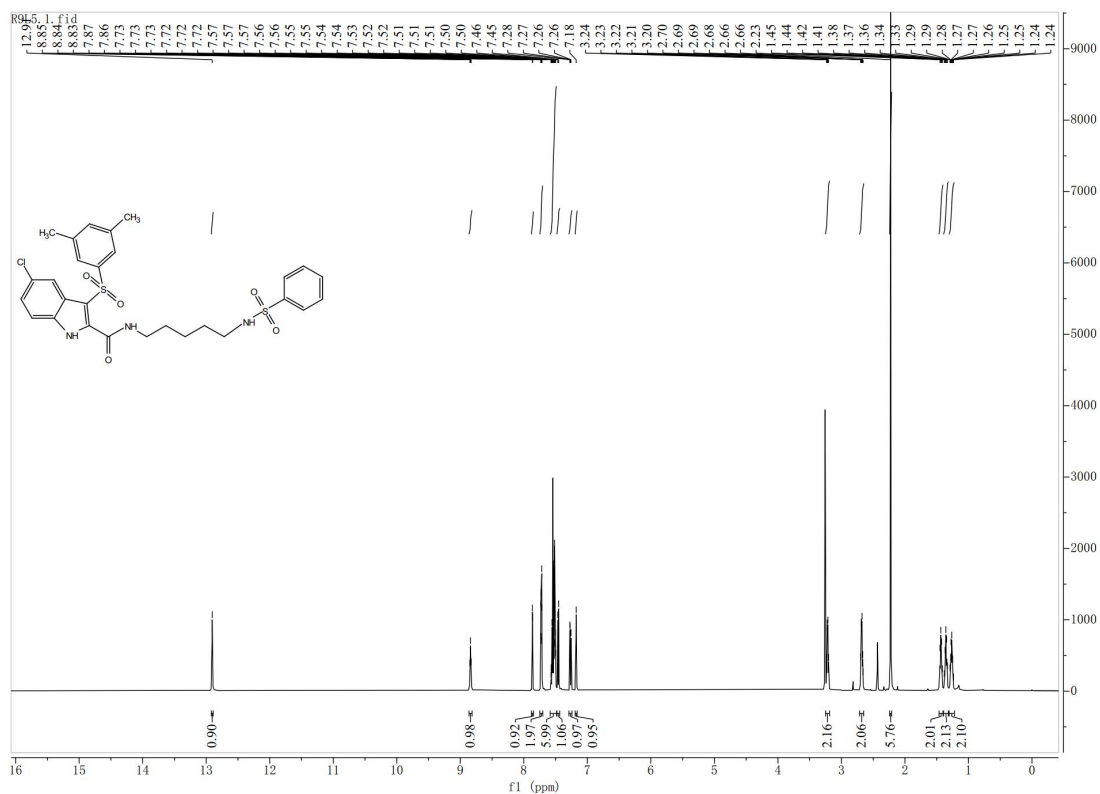

$^{13}\text{C}$  NMR (150 MHz,  $\text{DMSO}-d_6$ ) of **R<sub>9</sub>L<sub>5</sub>**

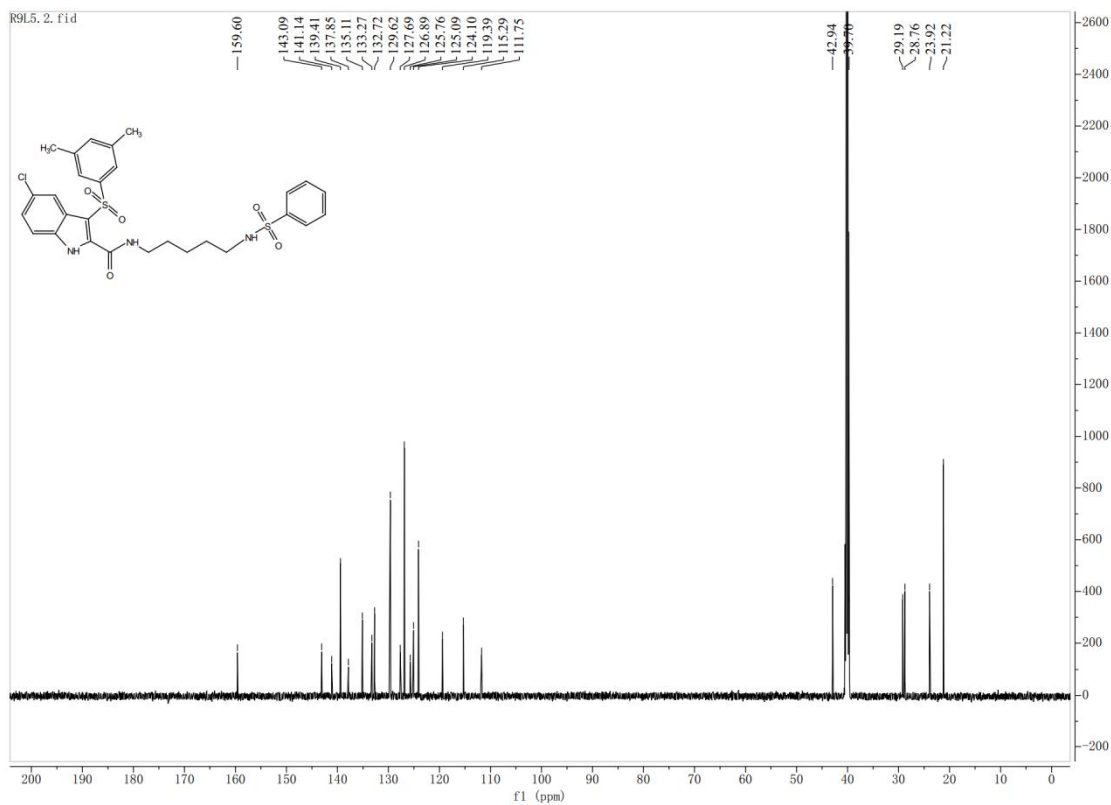

$^1\text{H}$  NMR (600 MHz, DMSO- $d_6$ ) of **R<sub>10</sub>L<sub>2</sub>**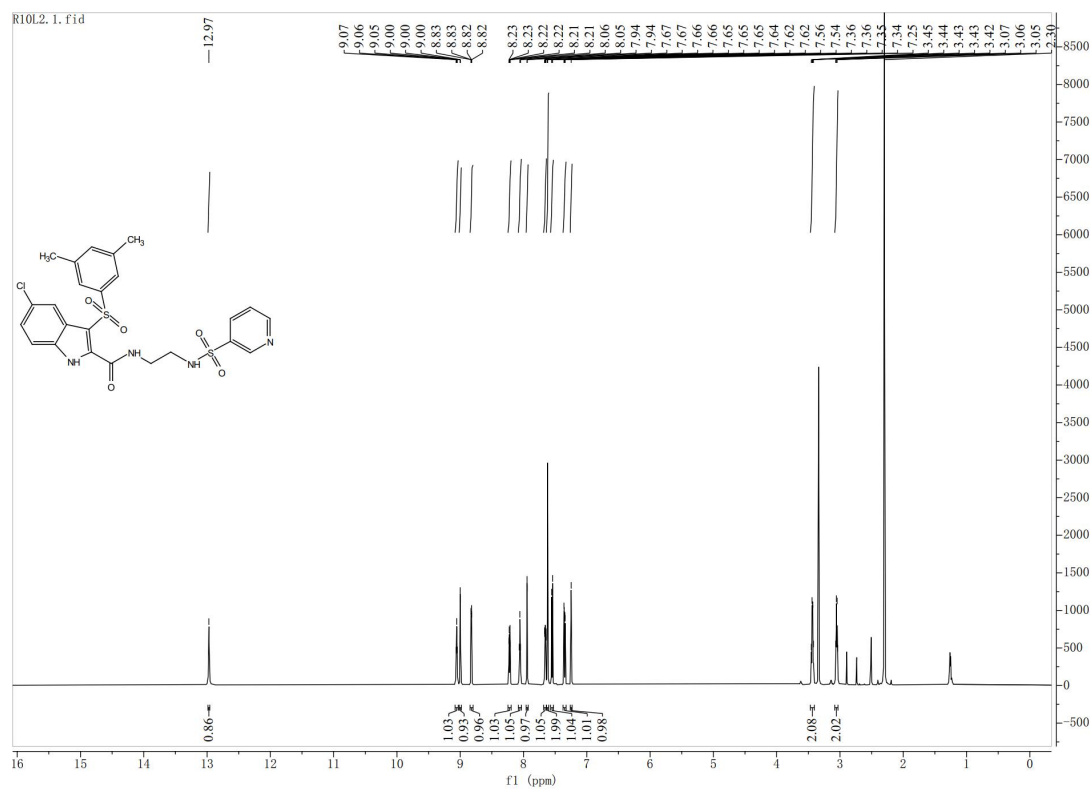 $^{13}\text{C}$  NMR (150 MHz, DMSO- $d_6$ ) of **R**<sub>10</sub>**L**<sub>2</sub>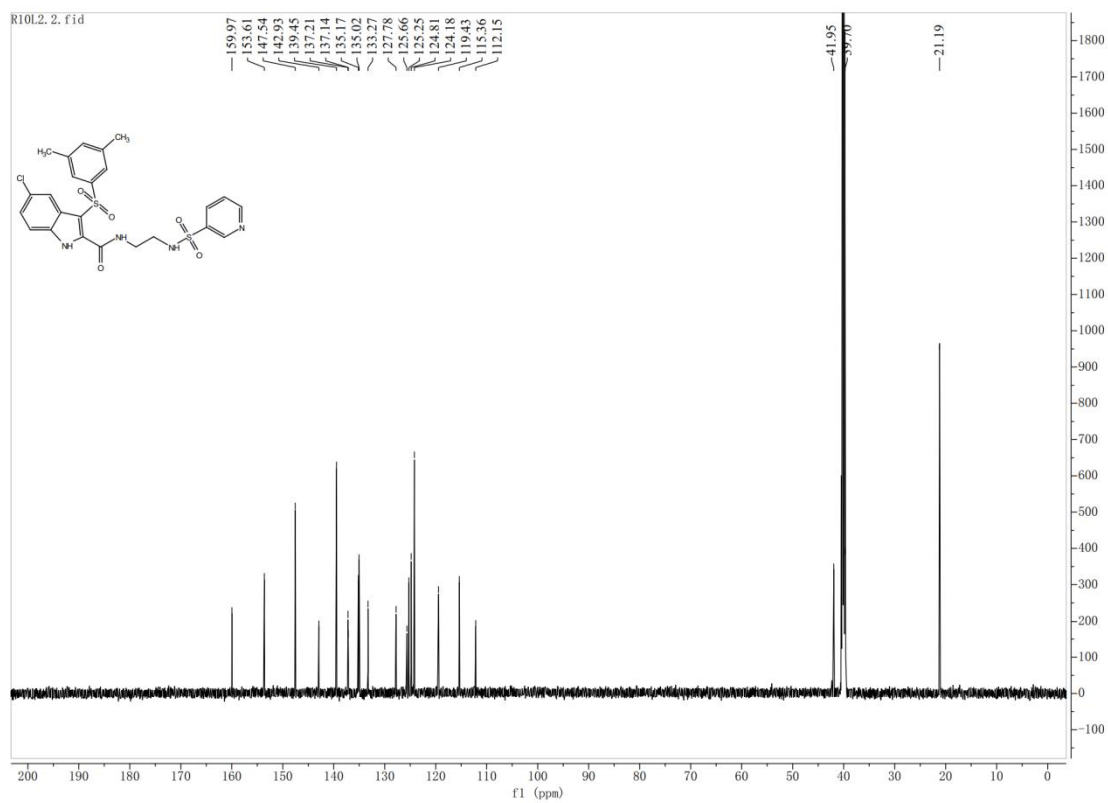

$^1\text{H}$  NMR (600 MHz,  $\text{DMSO}-d_6$ ) of **R<sub>10</sub>L<sub>3</sub>**

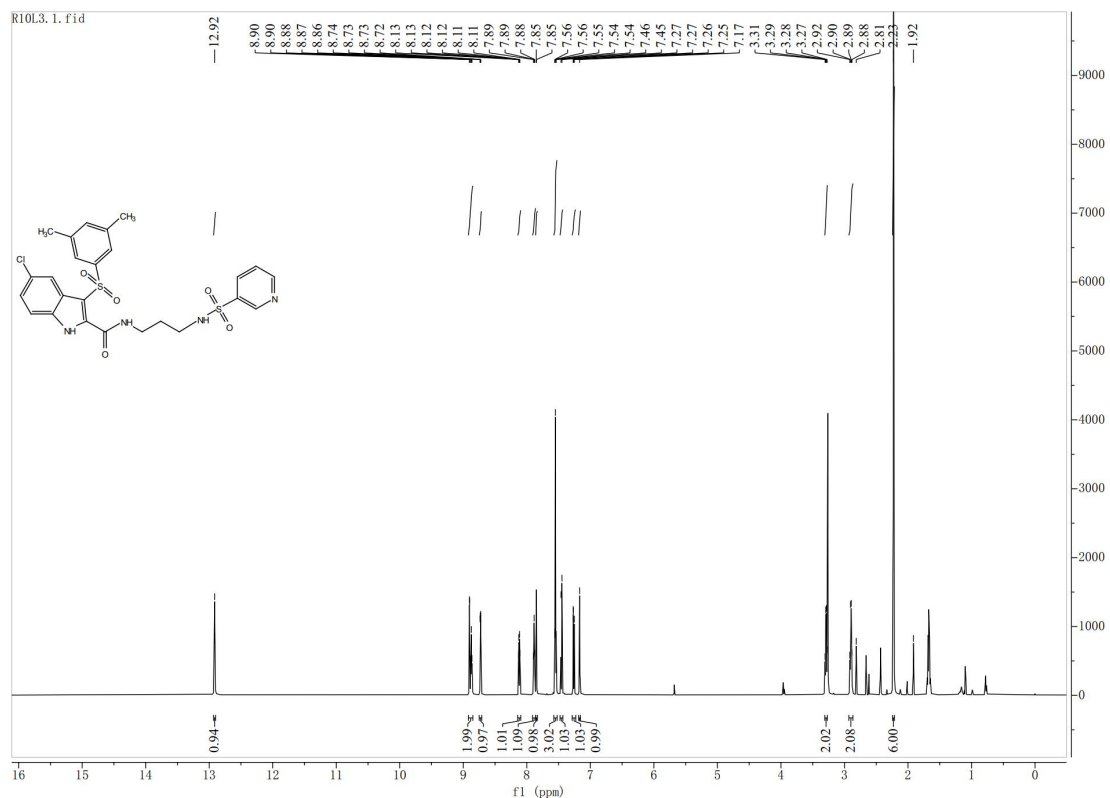

$^{13}\text{C}$  NMR (150 MHz,  $\text{DMSO}-d_6$ ) of **R<sub>10</sub>L<sub>3</sub>**

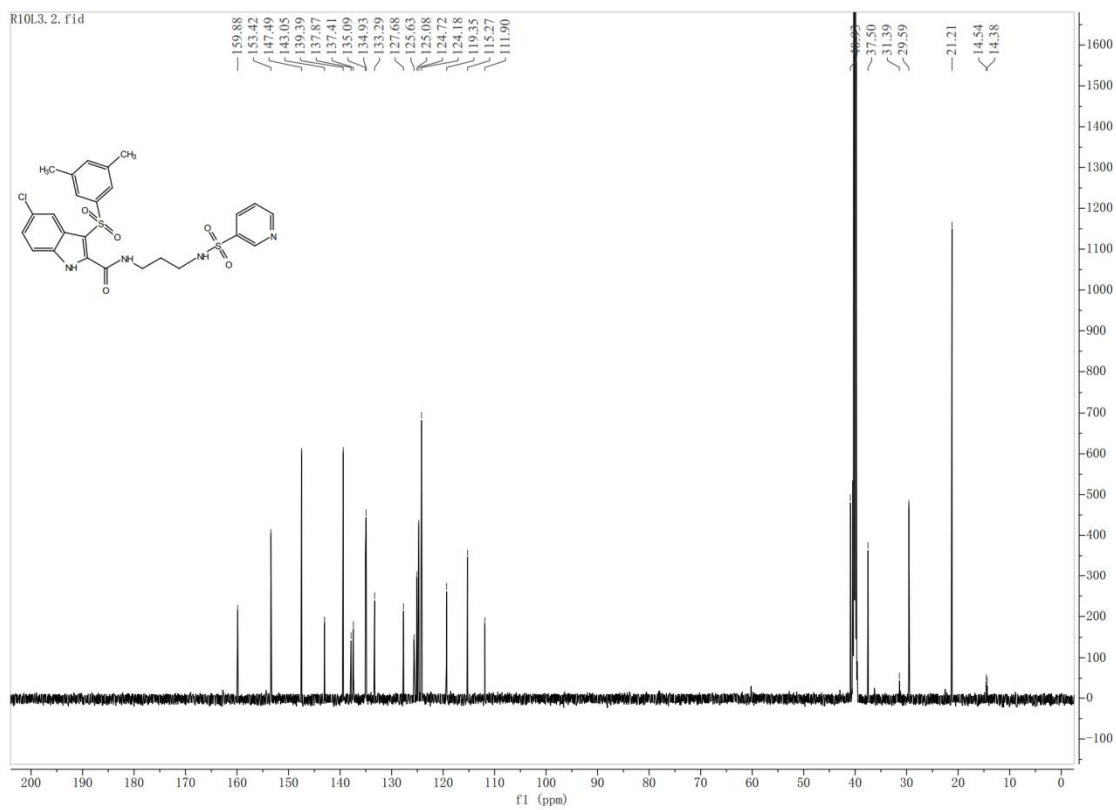

$^1\text{H}$  NMR (600 MHz,  $\text{DMSO-}d_6$ ) of **R<sub>10</sub>L<sub>4</sub>**

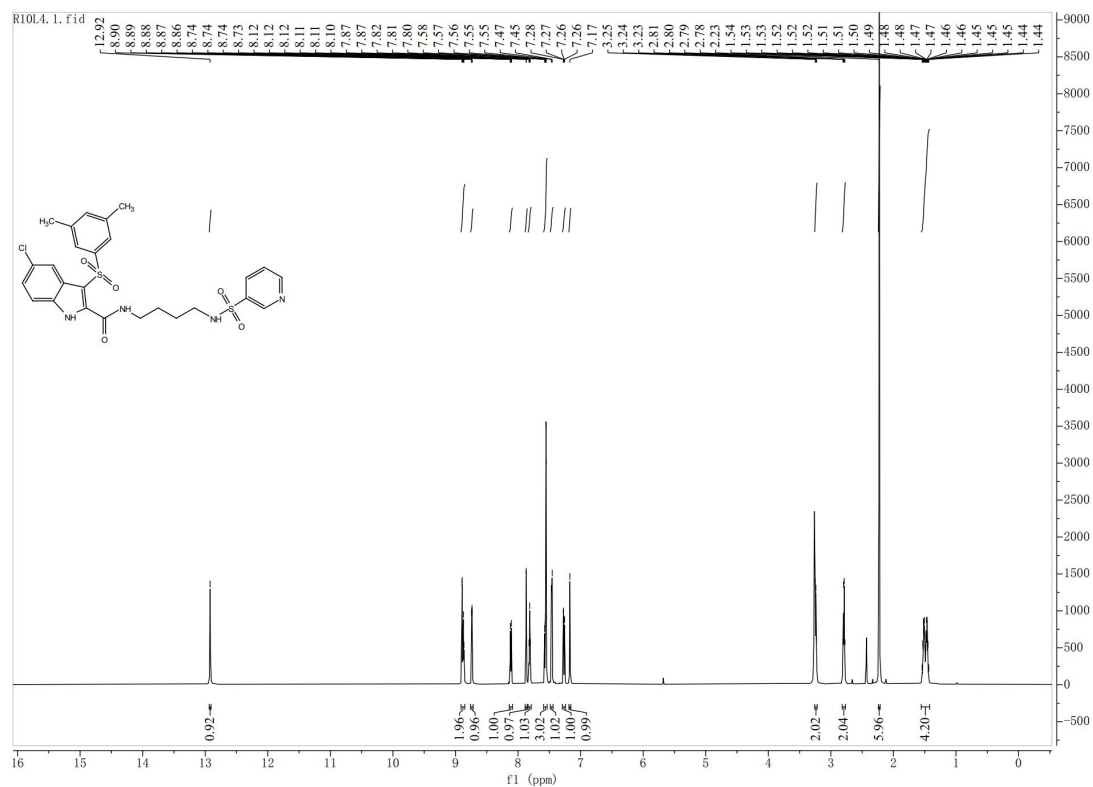

$^{13}\text{C}$  NMR (150 MHz,  $\text{DMSO-}d_6$ ) of **R<sub>10</sub>L<sub>4</sub>**

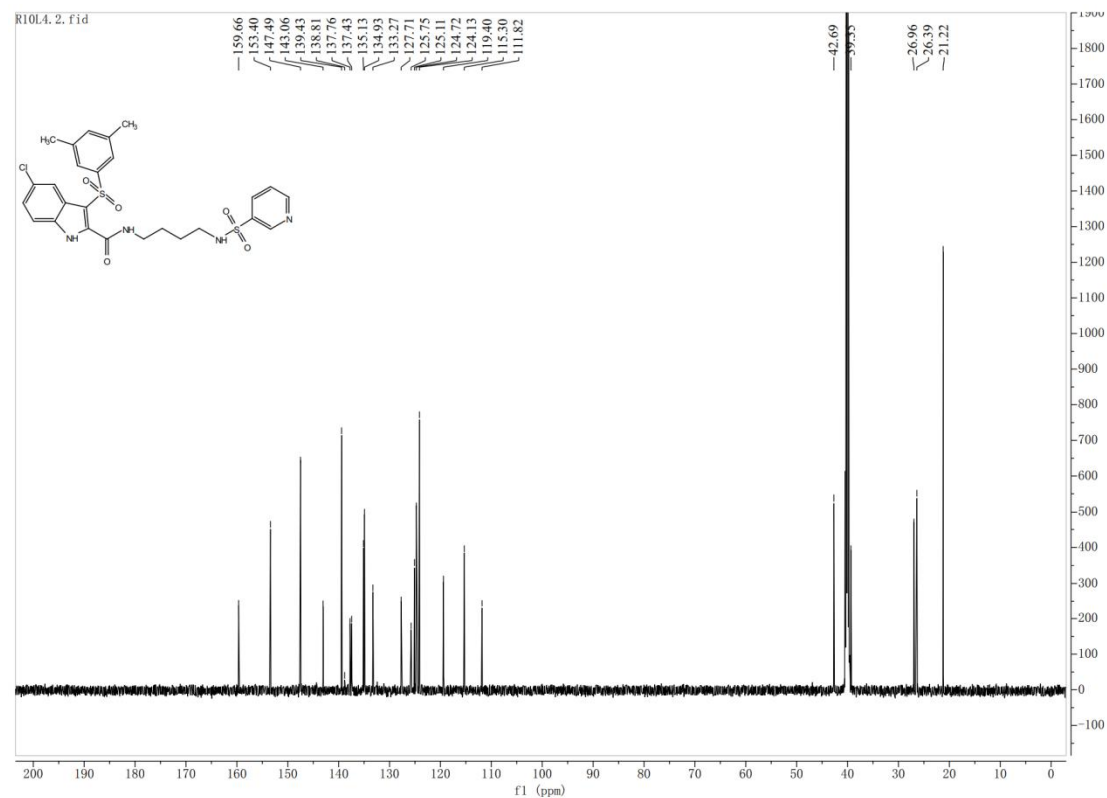

$^1\text{H}$  NMR (600 MHz,  $\text{DMSO}-d_6$ ) of **R<sub>10</sub>L<sub>5</sub>**

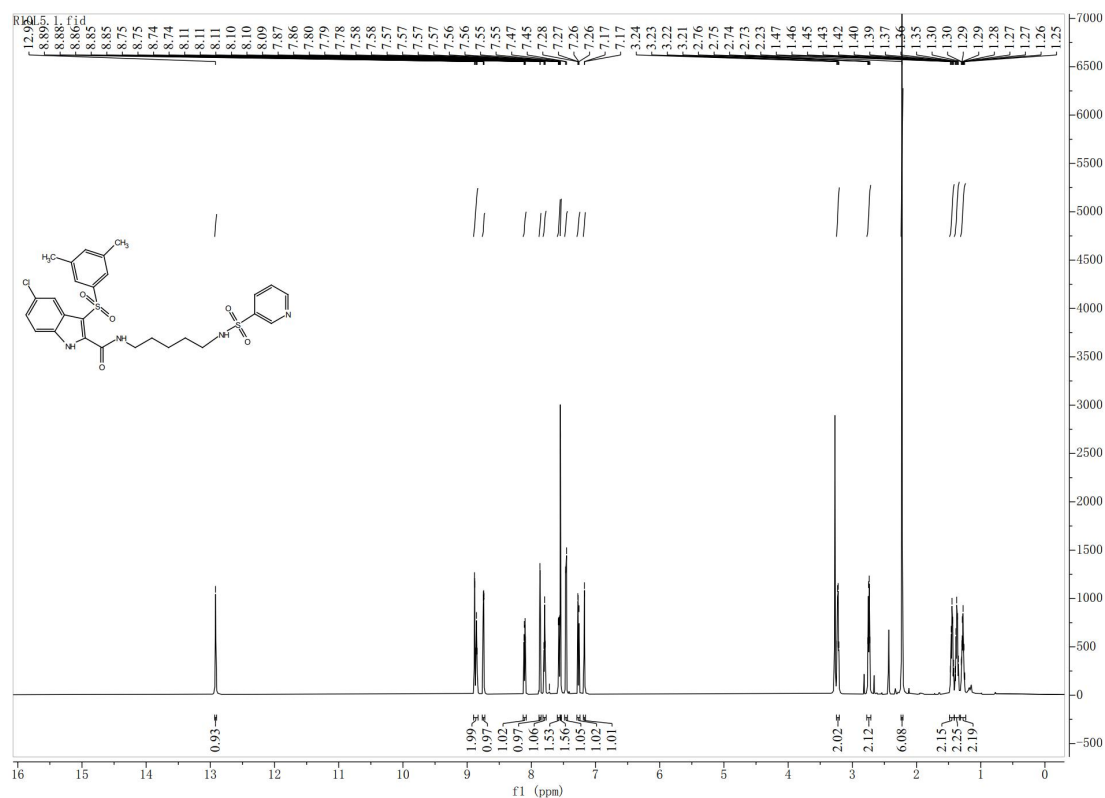

$^{13}\text{C}$  NMR (150 MHz,  $\text{DMSO}-d_6$ ) of **R<sub>10</sub>L<sub>5</sub>**

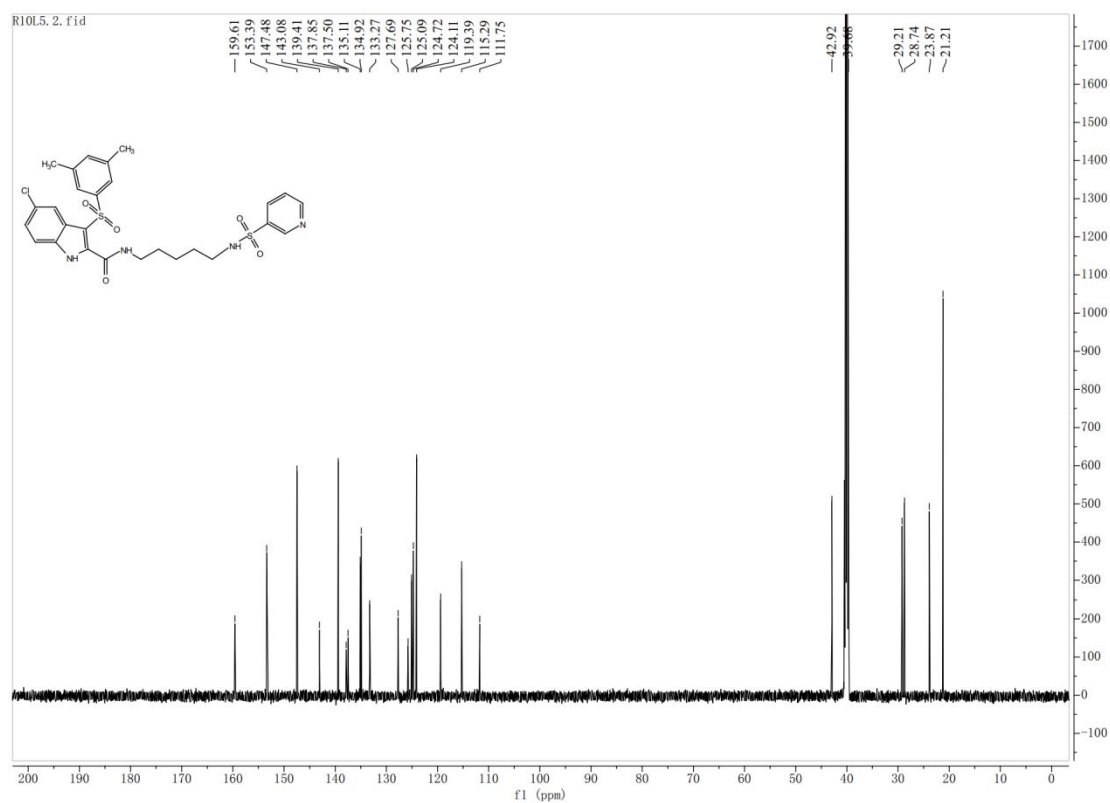

$^1\text{H}$  NMR (600 MHz,  $\text{DMSO-}d_6$ ) of  $\text{R}_{11}\text{L}_2$

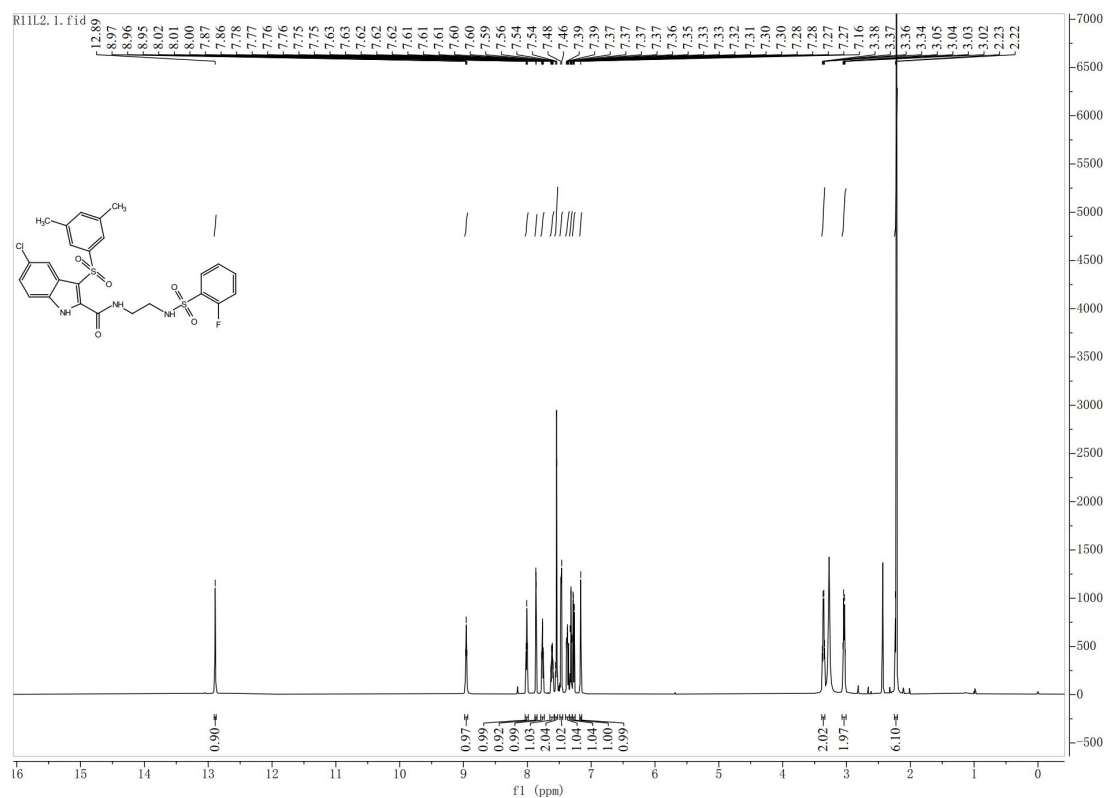

$^{13}\text{C}$  NMR (150 MHz,  $\text{DMSO-}d_6$ ) of  $\text{R}_{11}\text{L}_2$

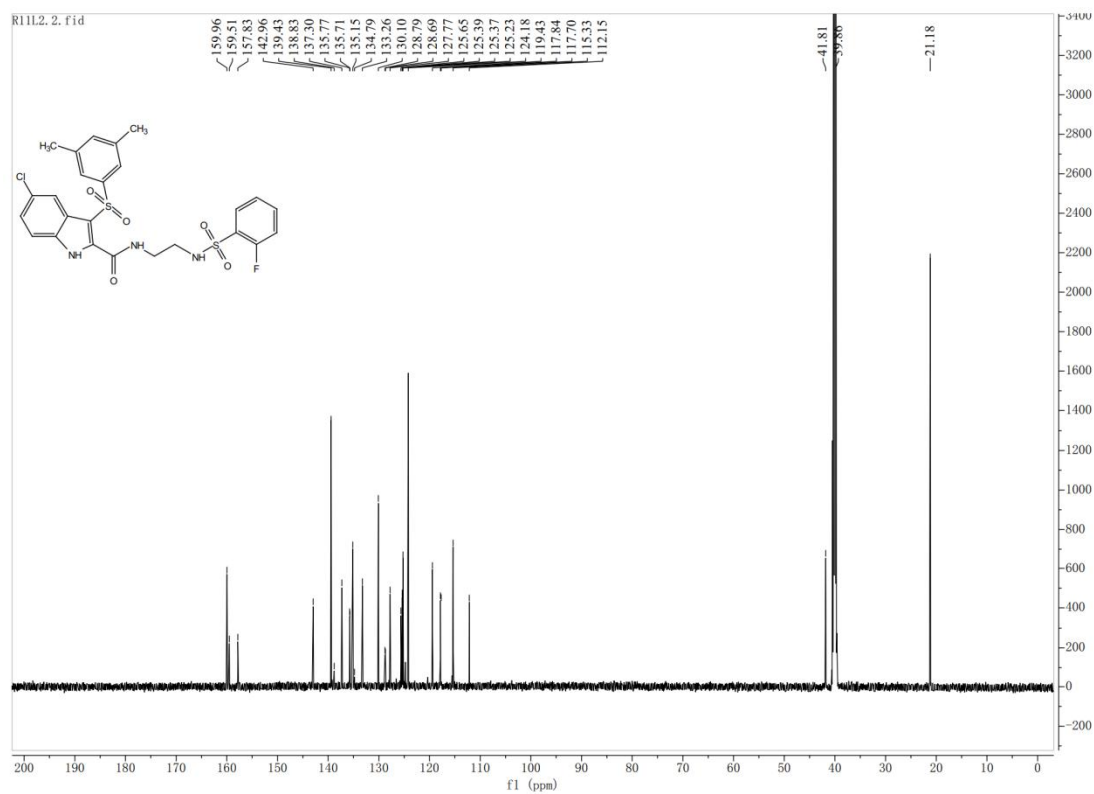

$^1\text{H}$  NMR (600 MHz,  $\text{DMSO-}d_6$ ) of  $\text{R}_{11}\text{L}_3$

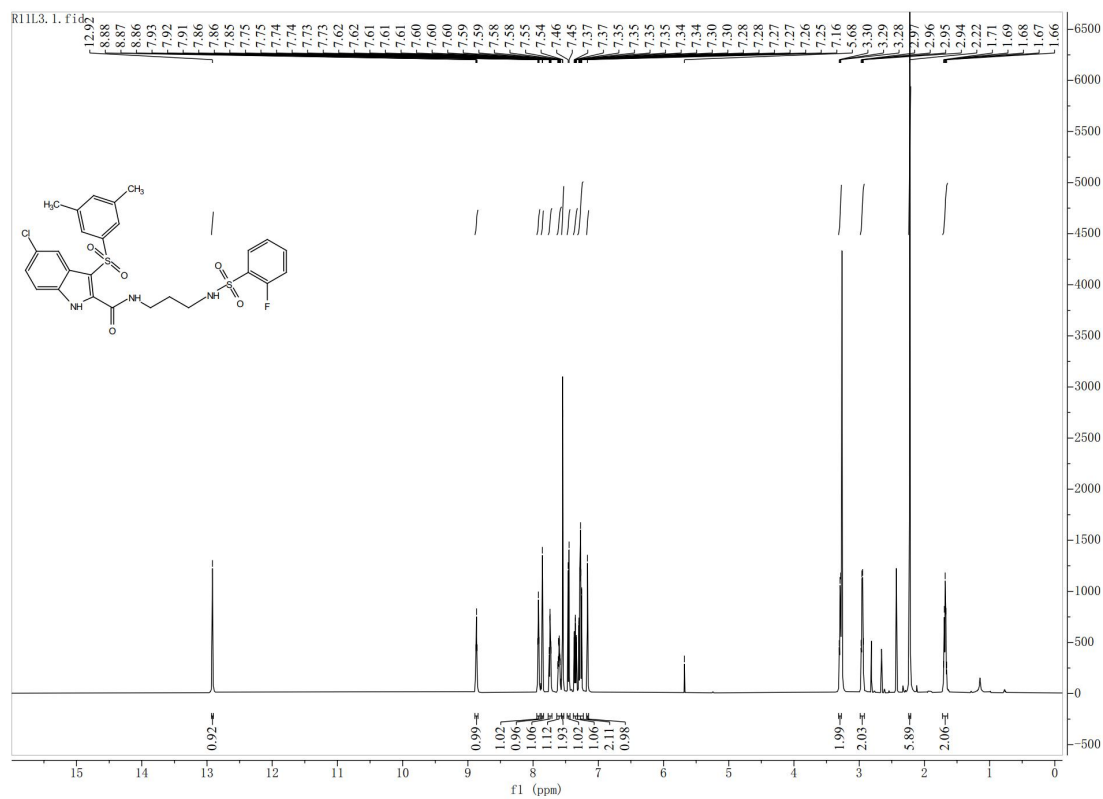

$^{13}\text{C}$  NMR (150 MHz,  $\text{DMSO-}d_6$ ) of  $\text{R}_{11}\text{L}_3$

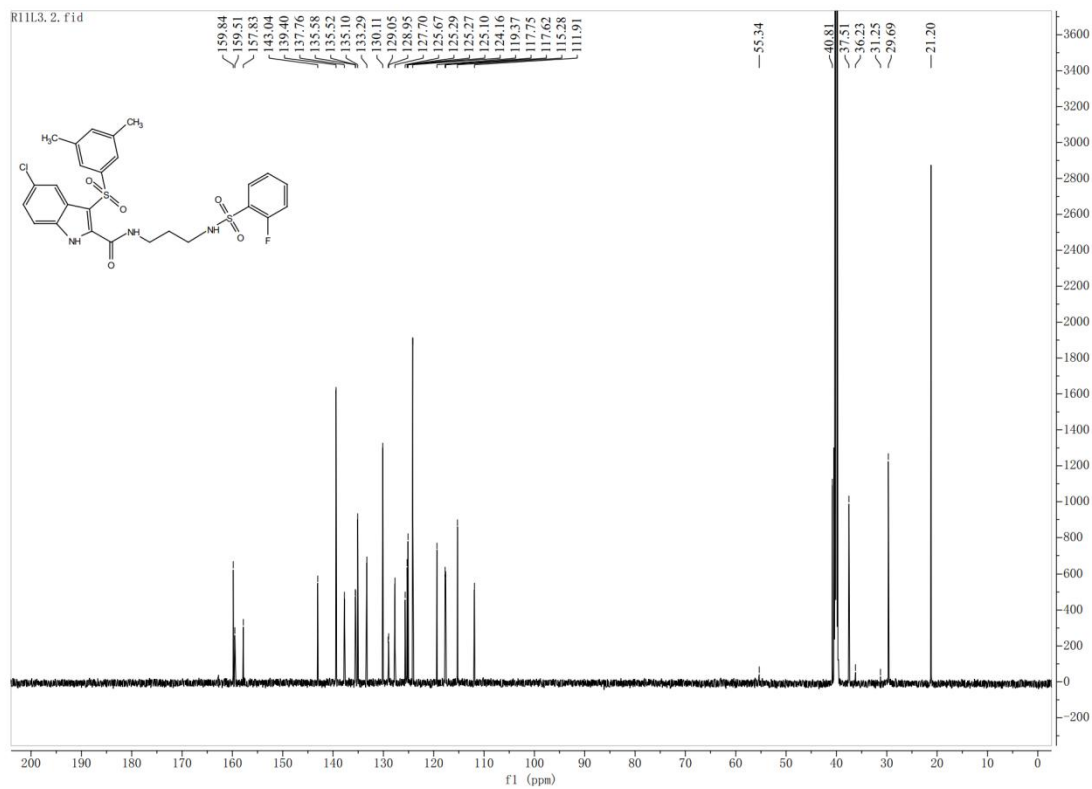

$^1\text{H}$  NMR (600 MHz,  $\text{DMSO-}d_6$ ) of  $\text{R}_{11}\text{L}_3$

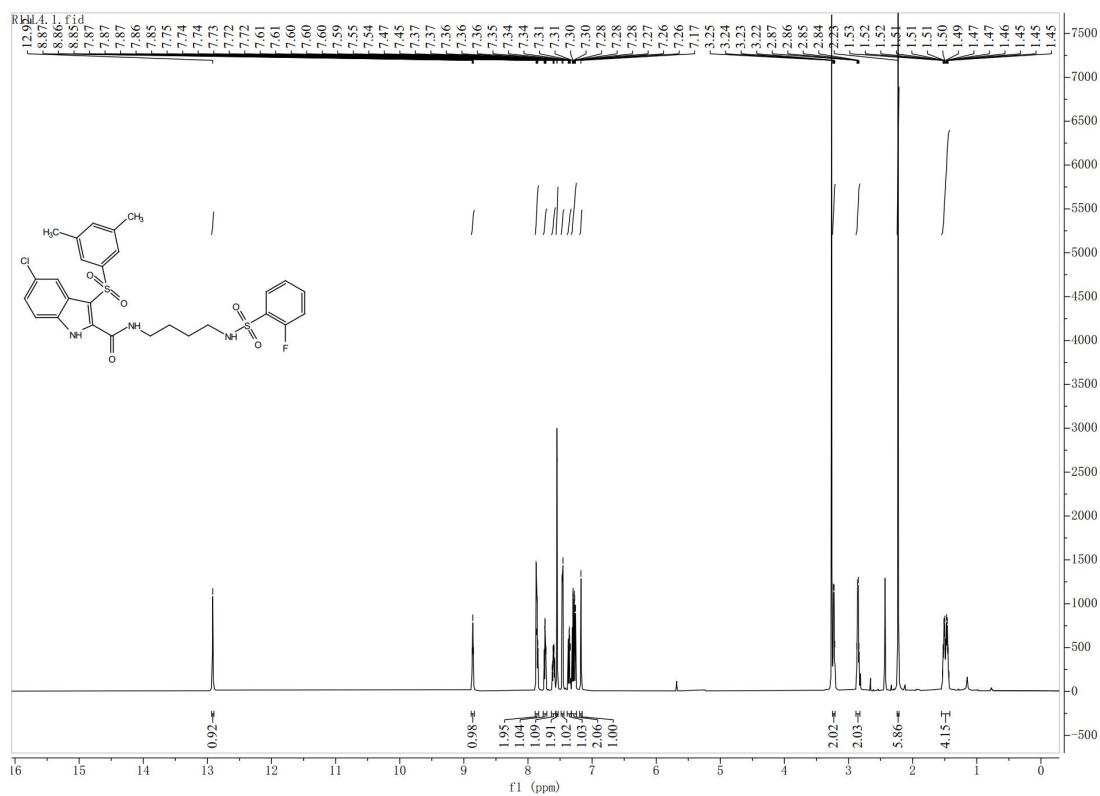

$^{13}\text{C}$  NMR (150 MHz,  $\text{DMSO-}d_6$ ) of  $\text{R}_{11}\text{L}_3$

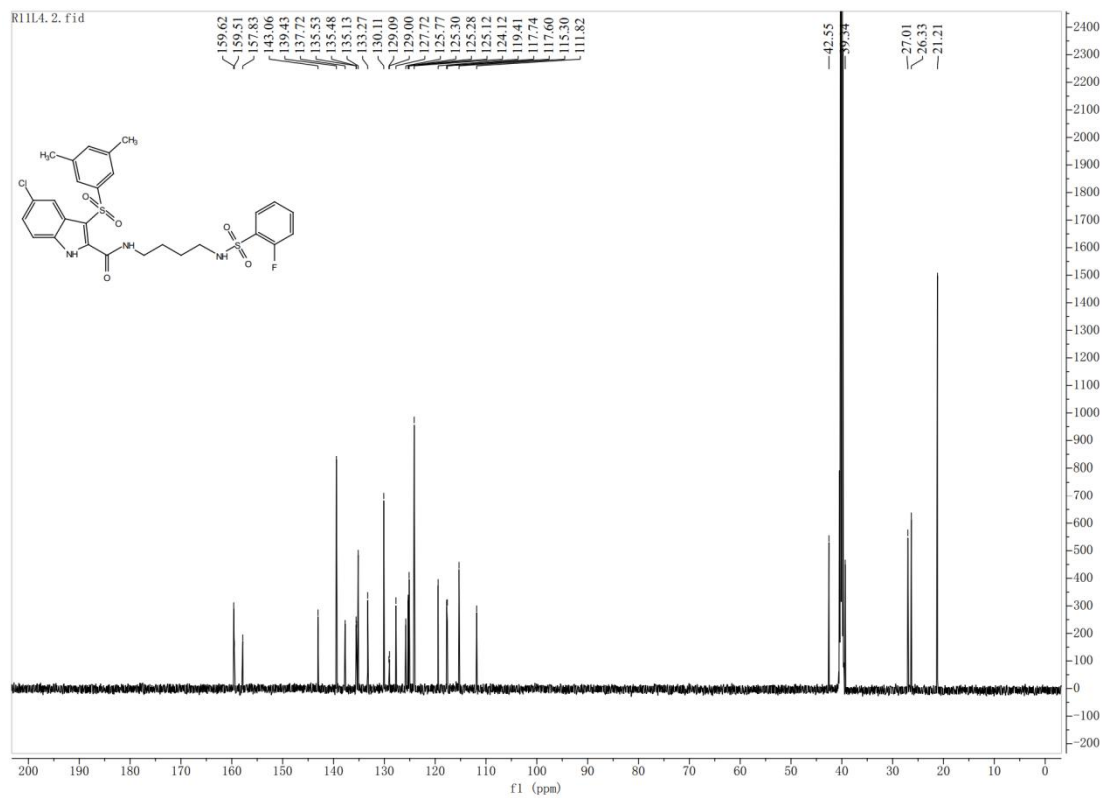

$^1\text{H}$  NMR (600 MHz,  $\text{DMSO}-d_6$ ) of  $\text{R}_{12}\text{L}_2$

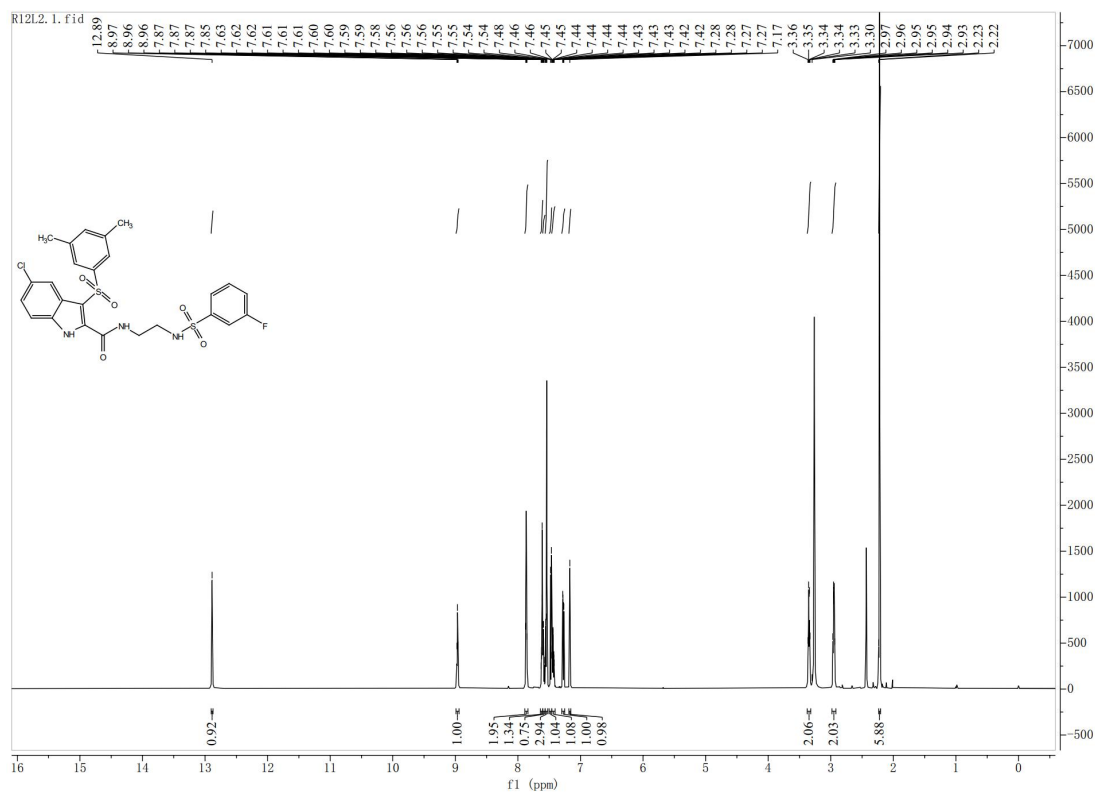

$^{13}\text{C}$  NMR (150 MHz,  $\text{DMSO}-d_6$ ) of  $\text{R}_{12}\text{L}_2$

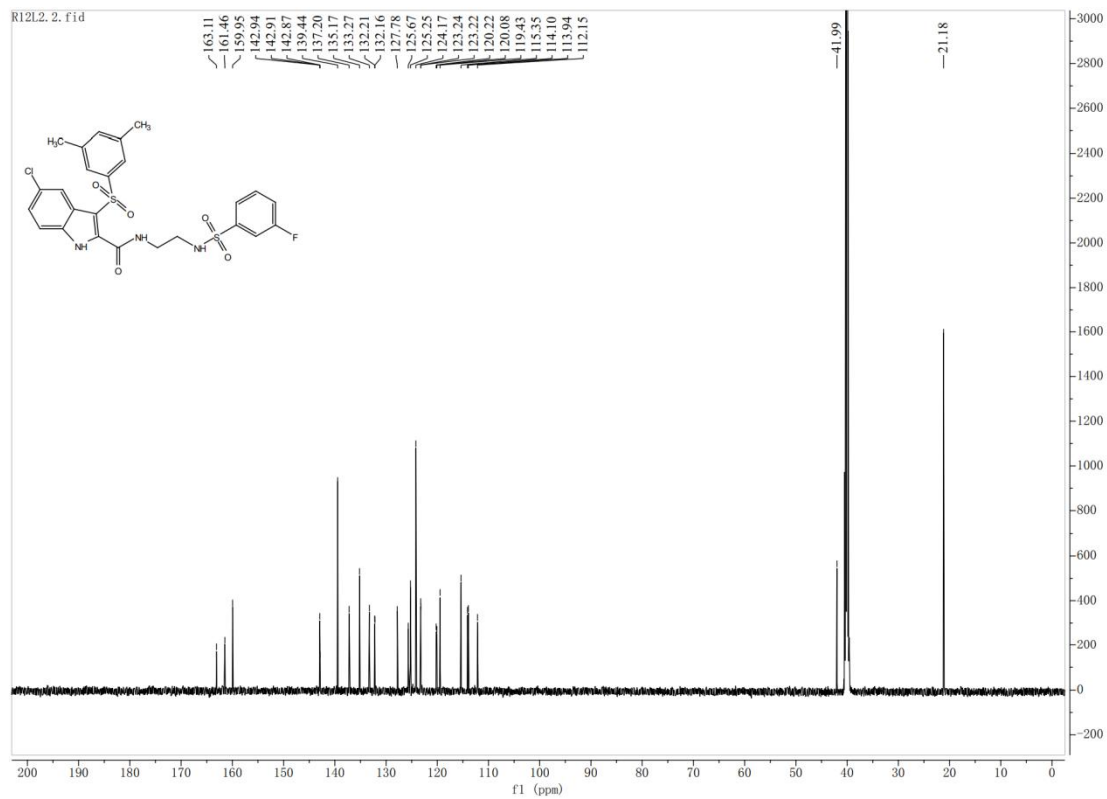

$^1\text{H}$  NMR (600 MHz,  $\text{DMSO}-d_6$ ) of  $\text{R}_{12}\text{L}_3$

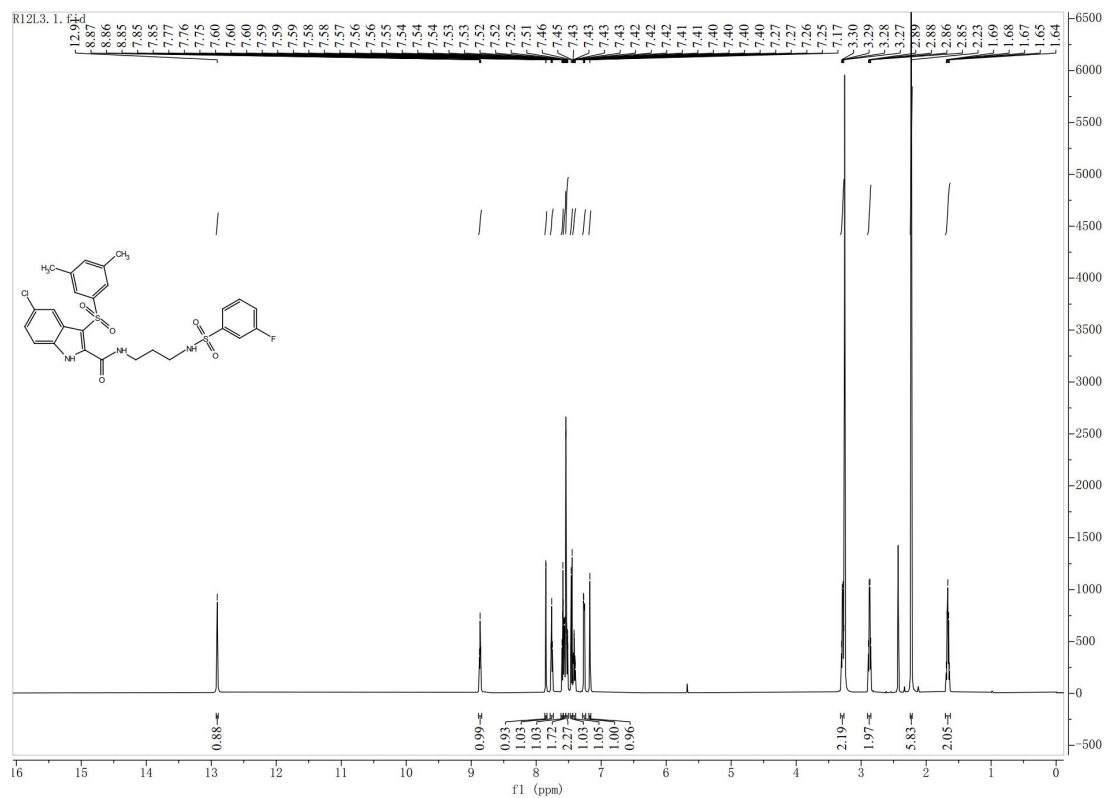

$^{13}\text{C}$  NMR (150 MHz,  $\text{DMSO}-d_6$ ) of  $\text{R}_{12}\text{L}_3$

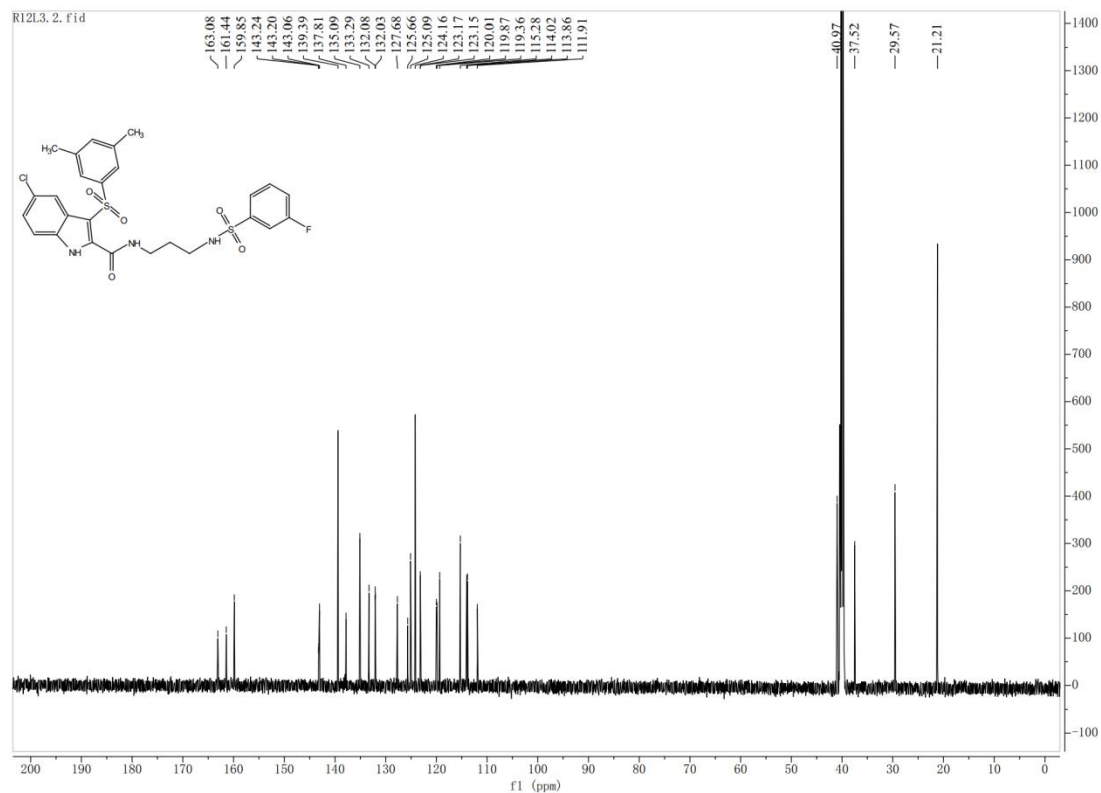

$^1\text{H}$  NMR (600 MHz,  $\text{DMSO}-d_6$ ) of  $\text{R}_{12}\text{L}_4$

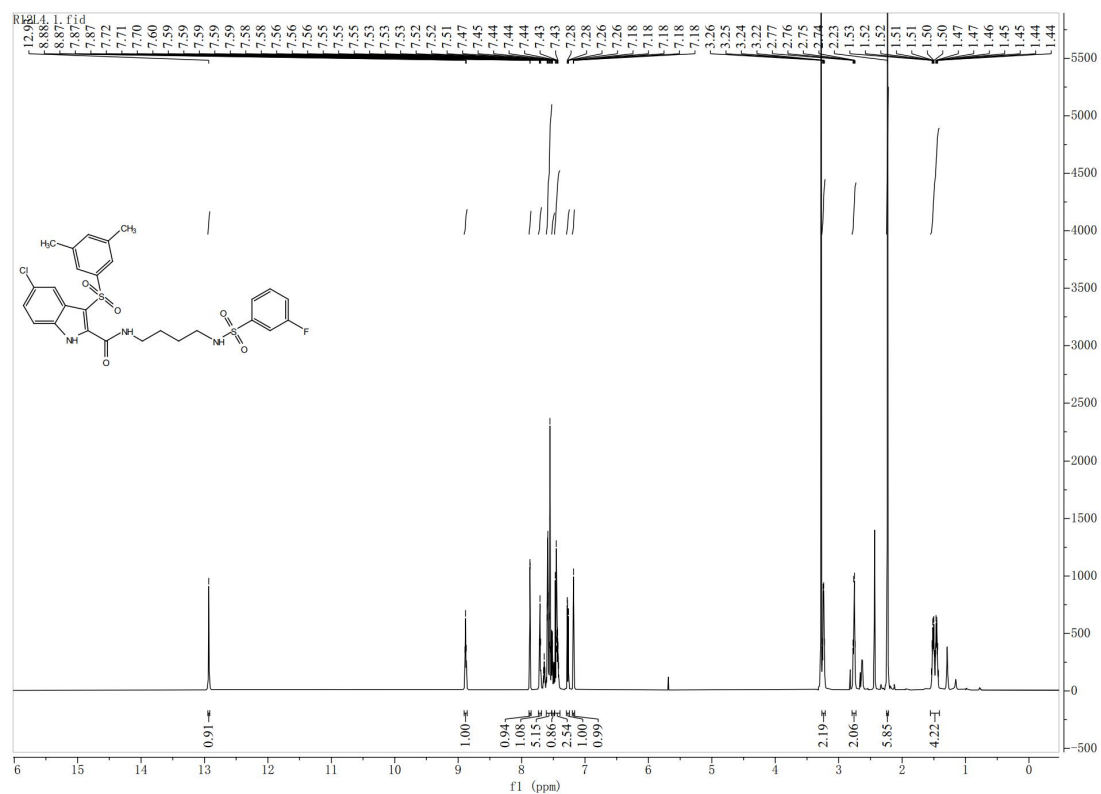

$^{13}\text{C}$  NMR (150 MHz,  $\text{DMSO}-d_6$ ) of  $\text{R}_{12}\text{L}_4$

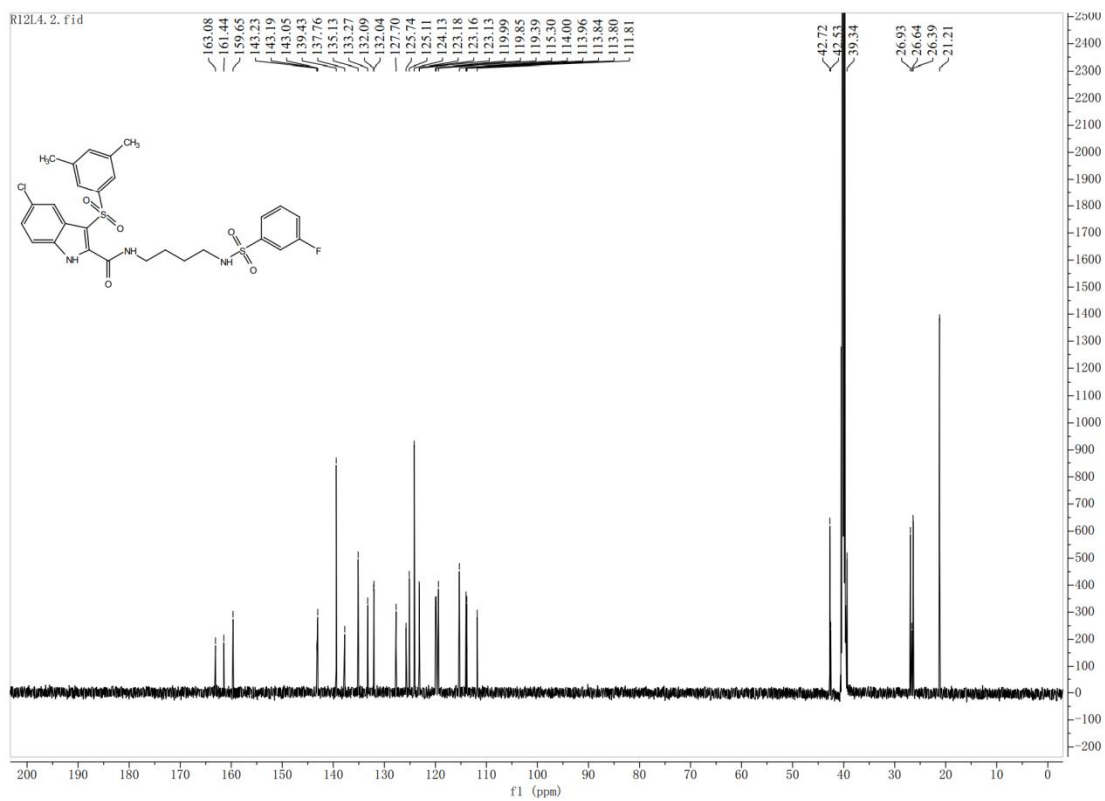

$^1\text{H}$  NMR (600 MHz,  $\text{DMSO}-d_6$ ) of  $\text{R}_{13}\text{L}_2$

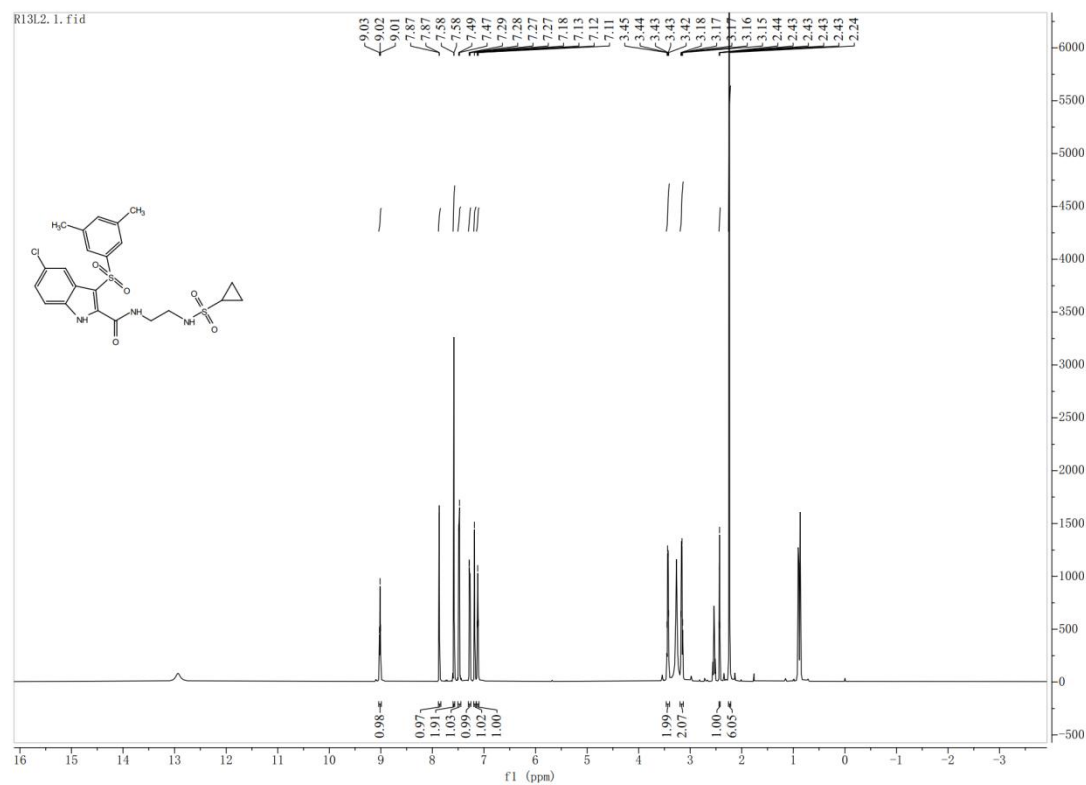

$^{13}\text{C}$  NMR (150 MHz,  $\text{DMSO}-d_6$ ) of  $\text{R}_{13}\text{L}_2$

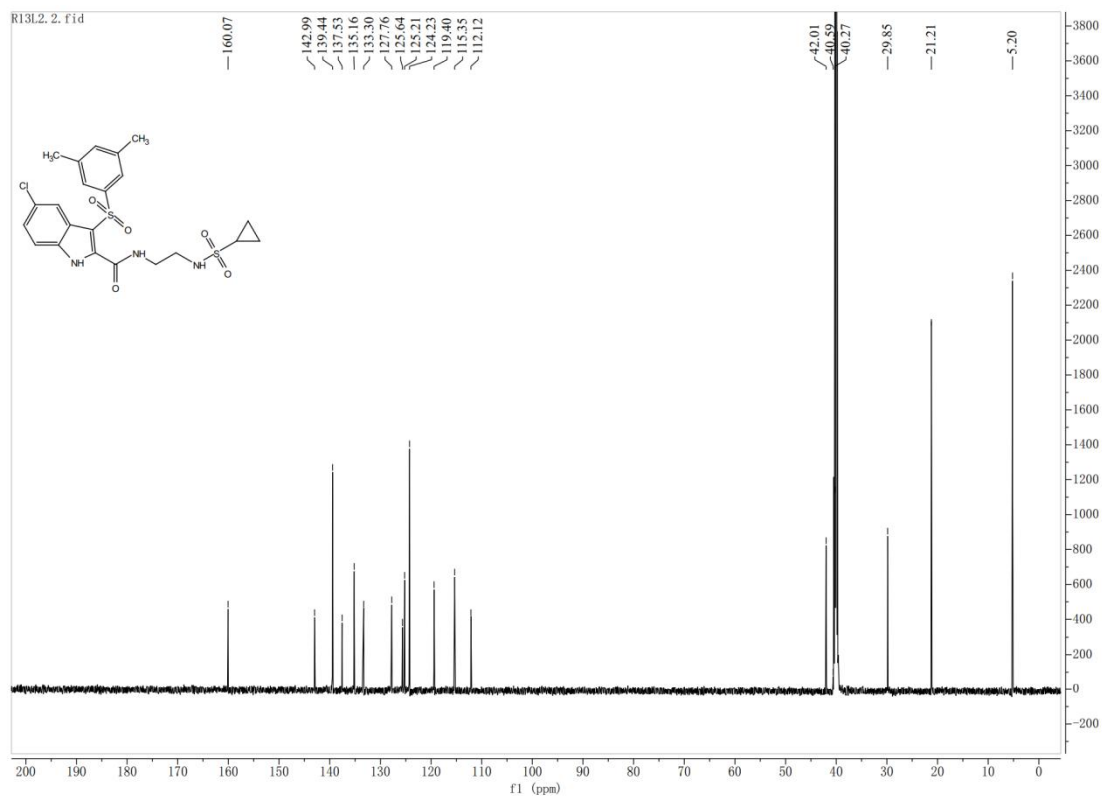

$^1\text{H}$  NMR (600 MHz,  $\text{DMSO-}d_6$ ) of **R<sub>14</sub>L<sub>2</sub>**

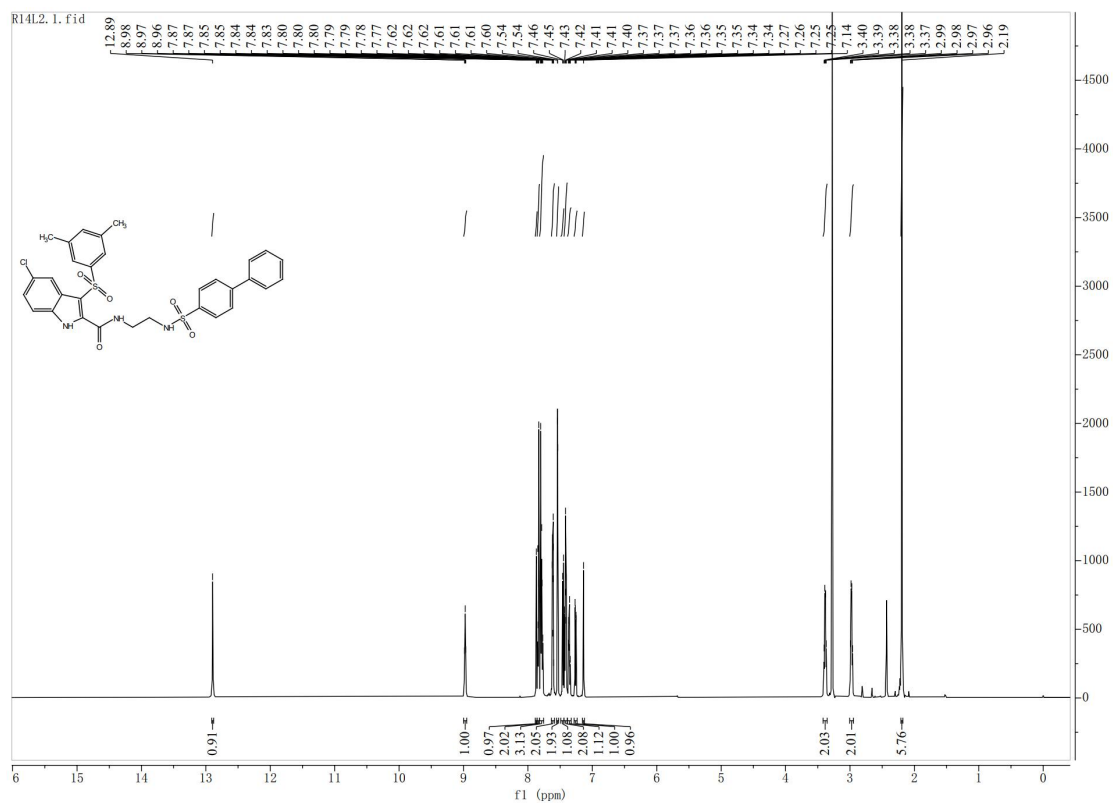

$^{13}\text{C}$  NMR (150 MHz,  $\text{DMSO-}d_6$ ) of **R<sub>14</sub>L<sub>2</sub>**

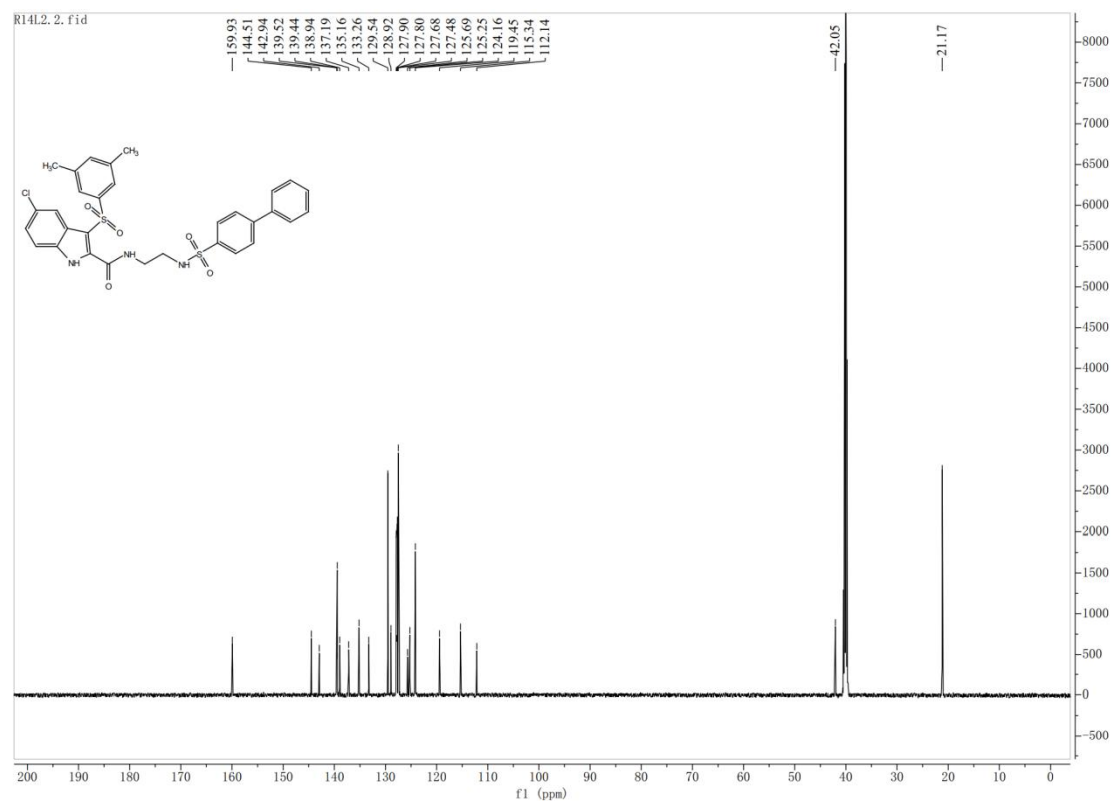

## HRMS spectra of representative final compounds

### HRMS spectrum of R<sub>1</sub>L<sub>2</sub>

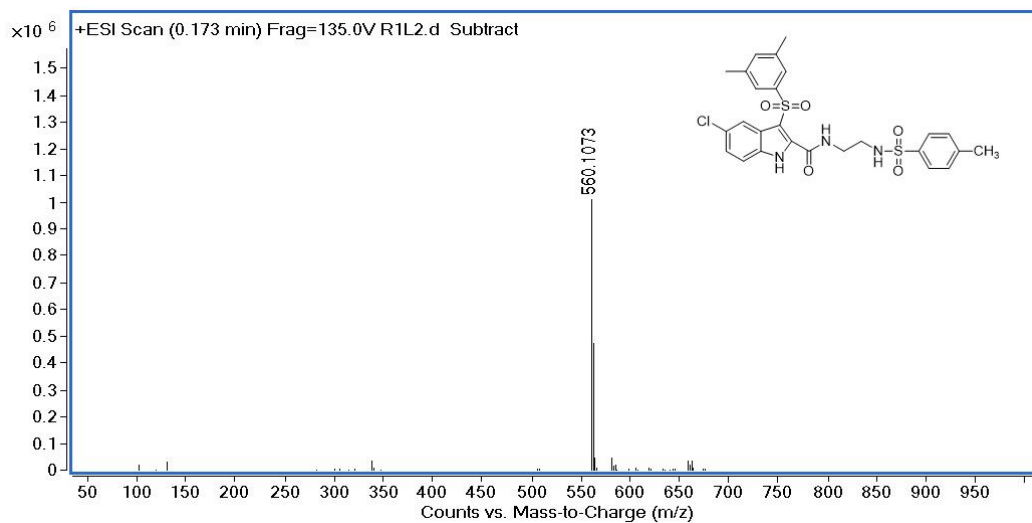

### HRMS spectrum of R<sub>1</sub>L<sub>3</sub>

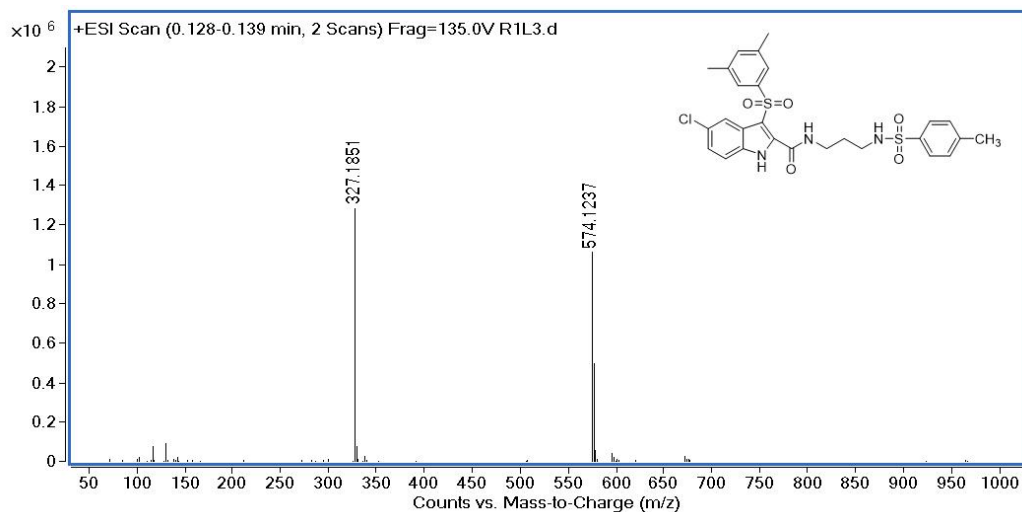

### HRMS spectrum of R<sub>1</sub>L<sub>4</sub>

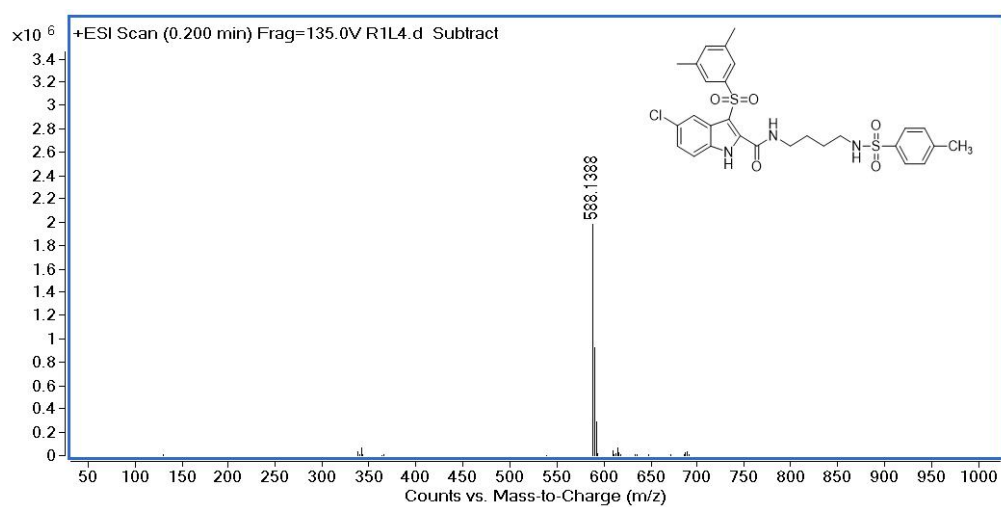

### HRMS spectrum of R<sub>1</sub>L<sub>5</sub>

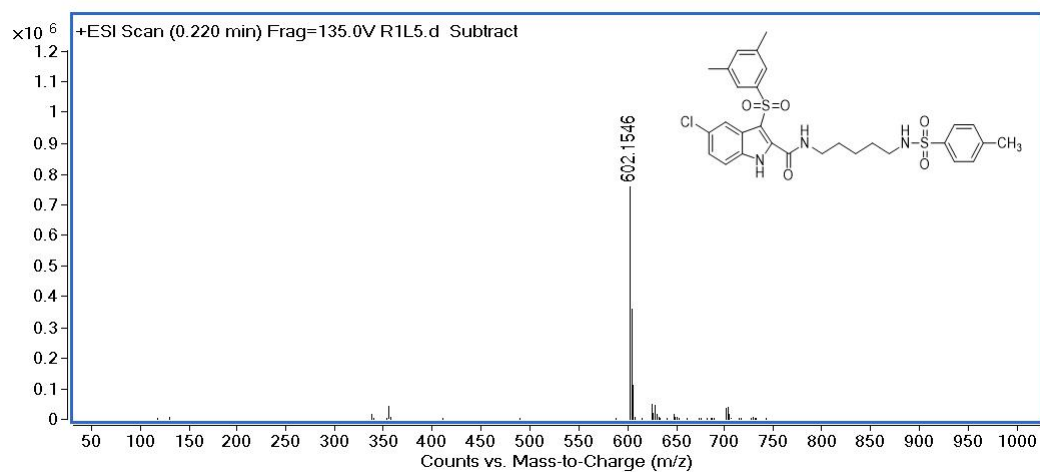

### HRMS spectrum of R<sub>2</sub>L<sub>2</sub>

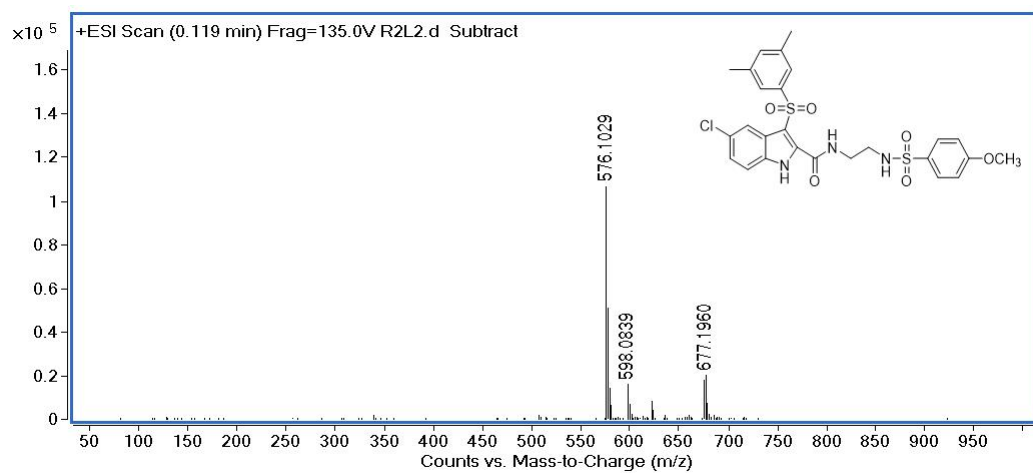

### HRMS spectrum of R<sub>2</sub>L<sub>3</sub>

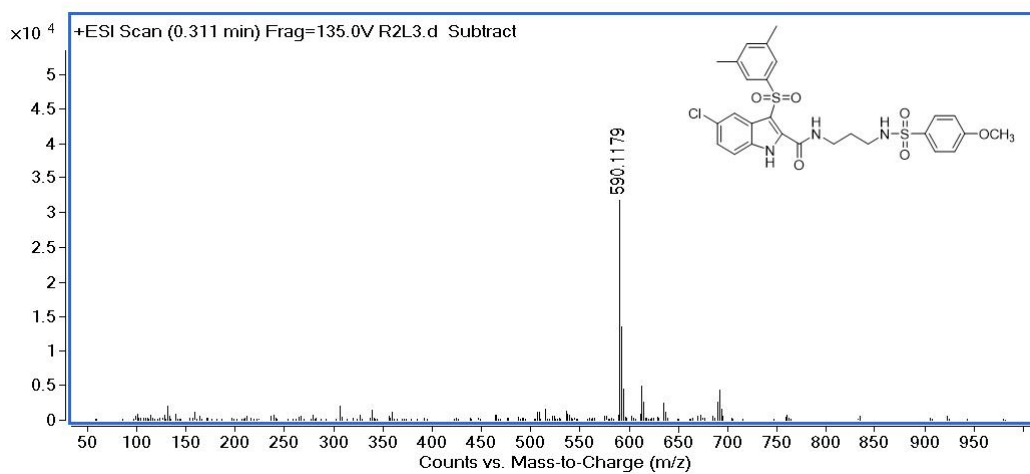

### HRMS spectrum of R<sub>2</sub>L<sub>4</sub>

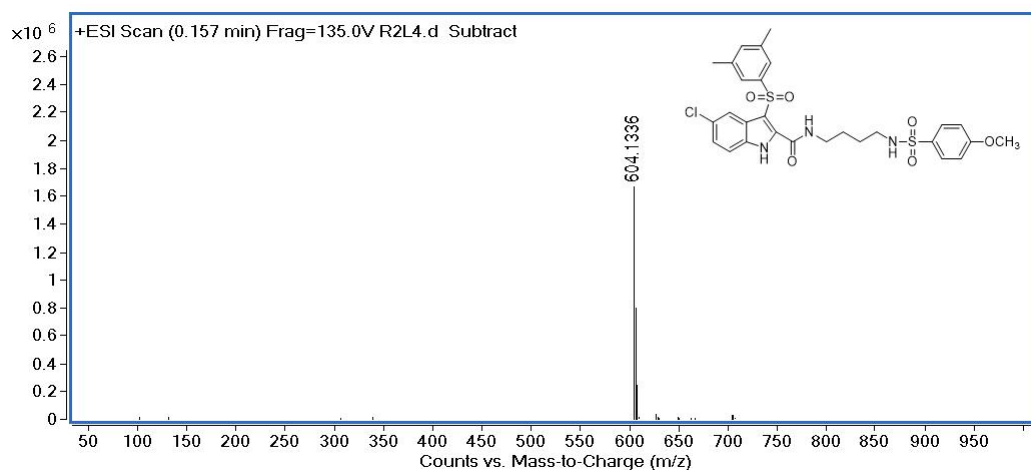

### HRMS spectrum of R<sub>2</sub>L<sub>5</sub>

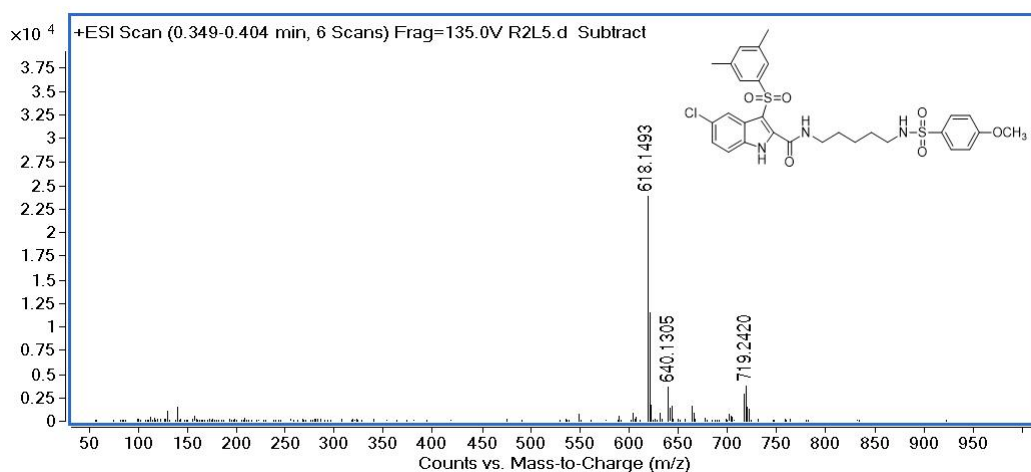

### HRMS spectrum of R<sub>3</sub>L<sub>2</sub>

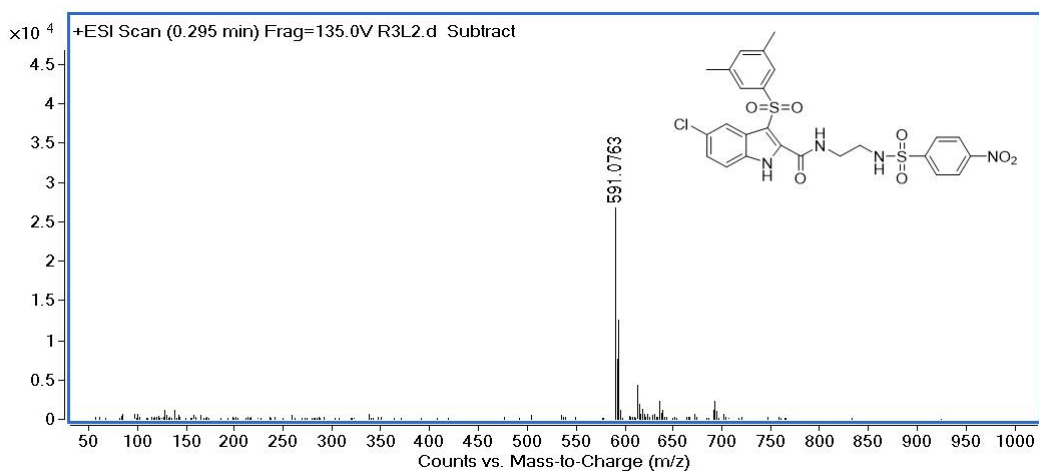

### HRMS spectrum of R<sub>3</sub>L<sub>3</sub>

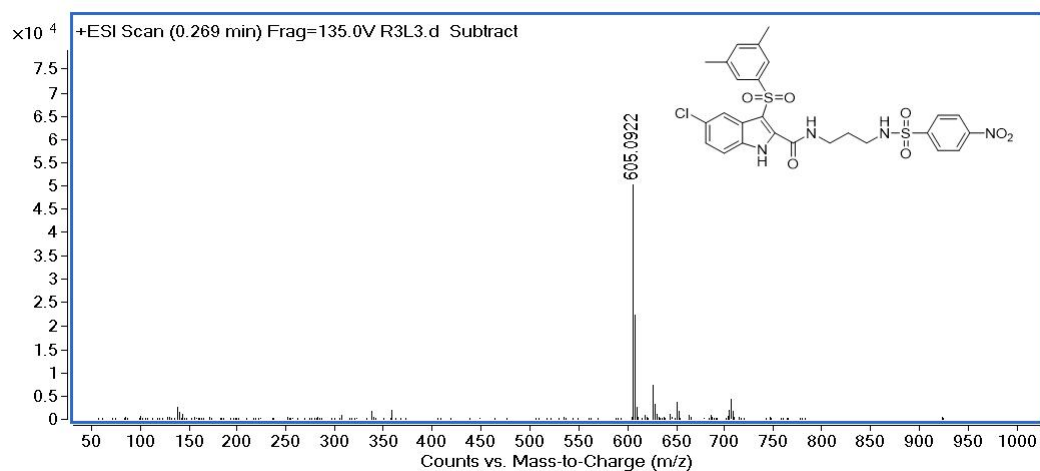

### HRMS spectrum of R<sub>3</sub>L<sub>4</sub>

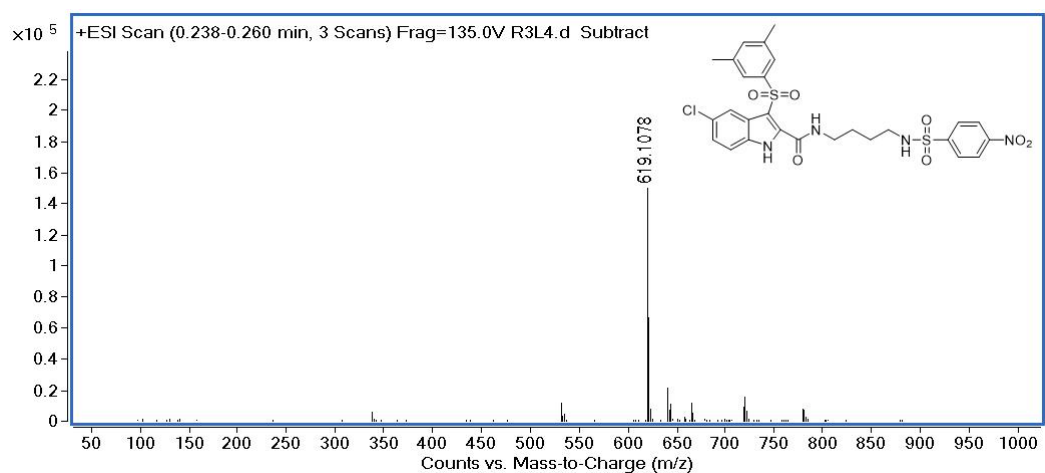

### HRMS spectrum of R<sub>3</sub>L<sub>5</sub>

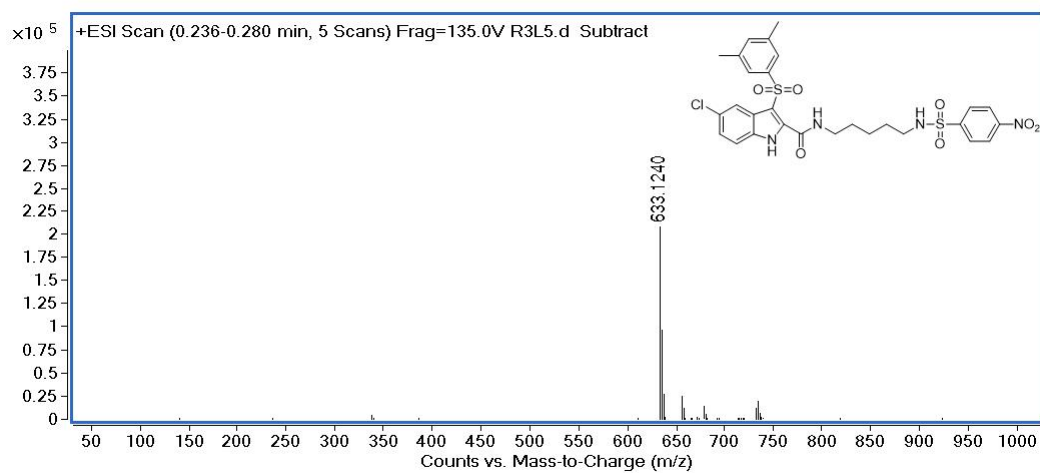

### HRMS spectrum of R<sub>4</sub>L<sub>2</sub>

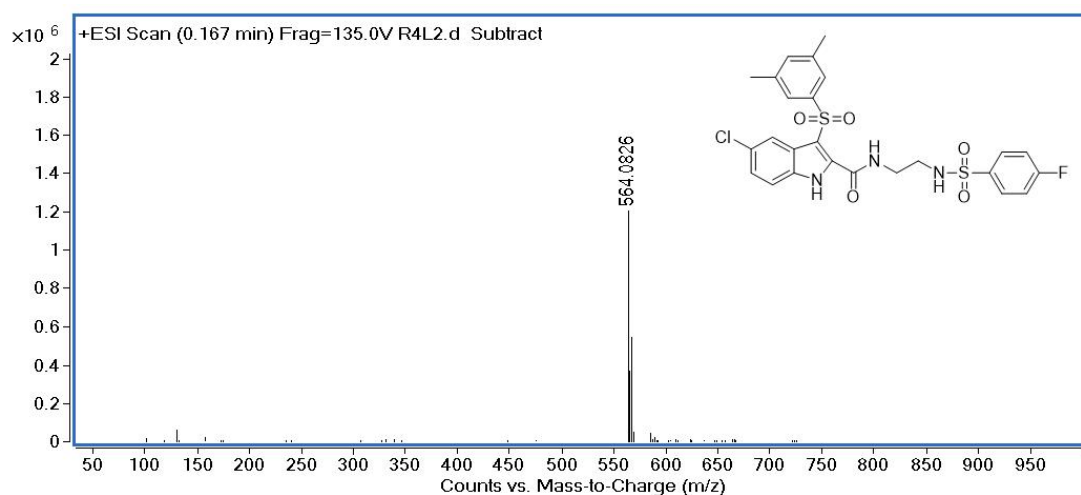

### HRMS spectrum of R<sub>4</sub>L<sub>3</sub>

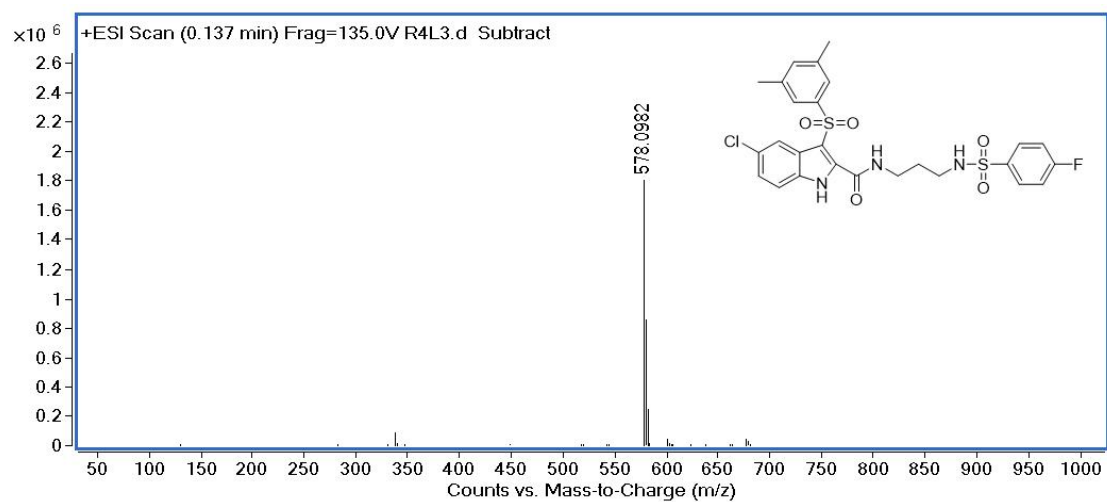

### HRMS spectrum of R<sub>4</sub>L<sub>4</sub>

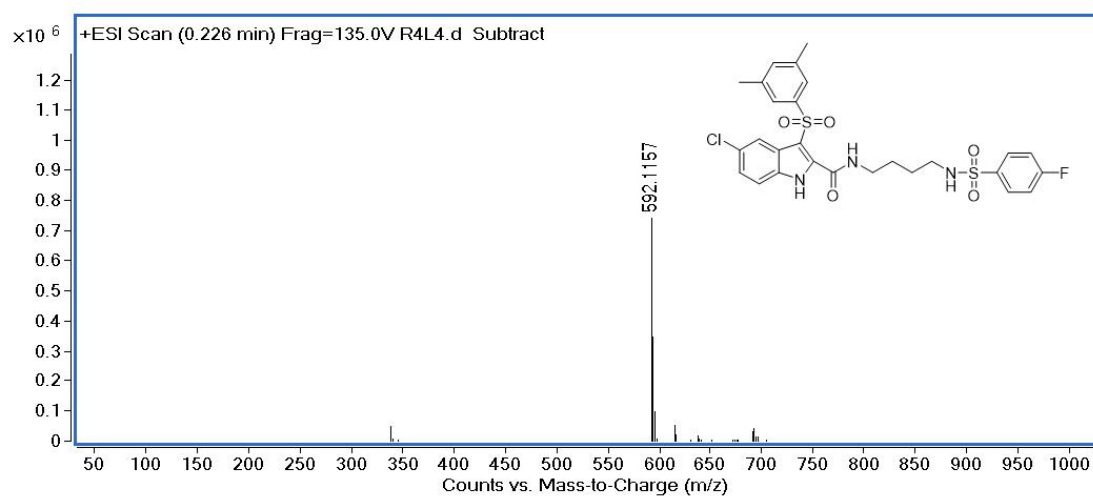

### HRMS spectrum of R<sub>4</sub>L<sub>5</sub>

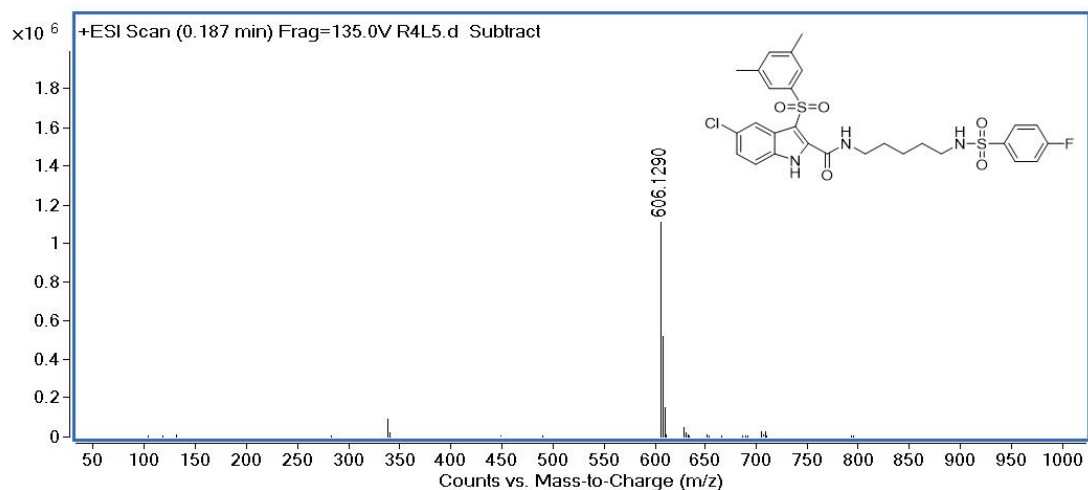

### HRMS spectrum of R<sub>5</sub>L<sub>2</sub>

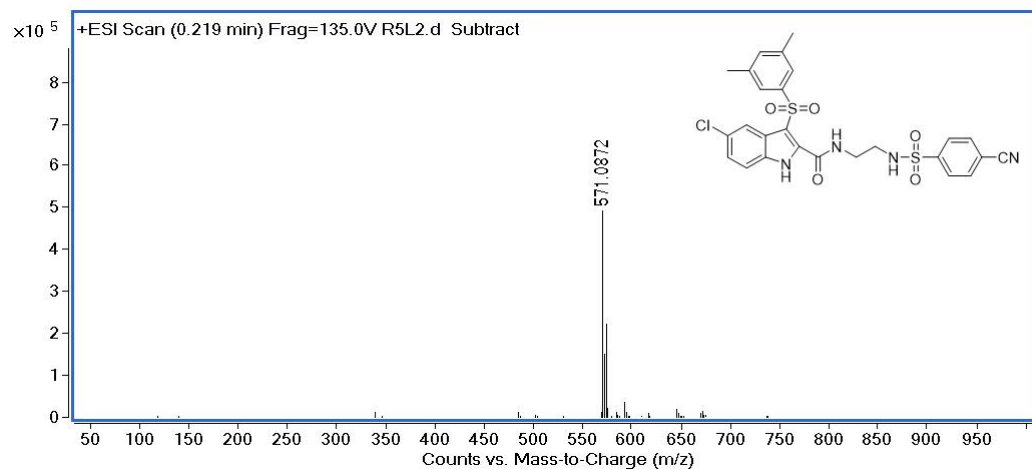

### HRMS spectrum of R<sub>5</sub>L<sub>3</sub>

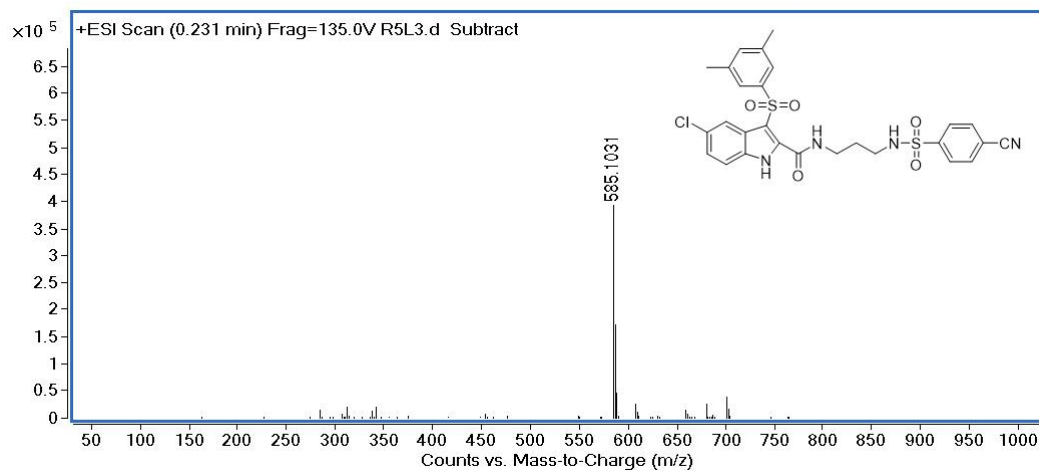

### HRMS spectrum of R<sub>5</sub>L<sub>4</sub>

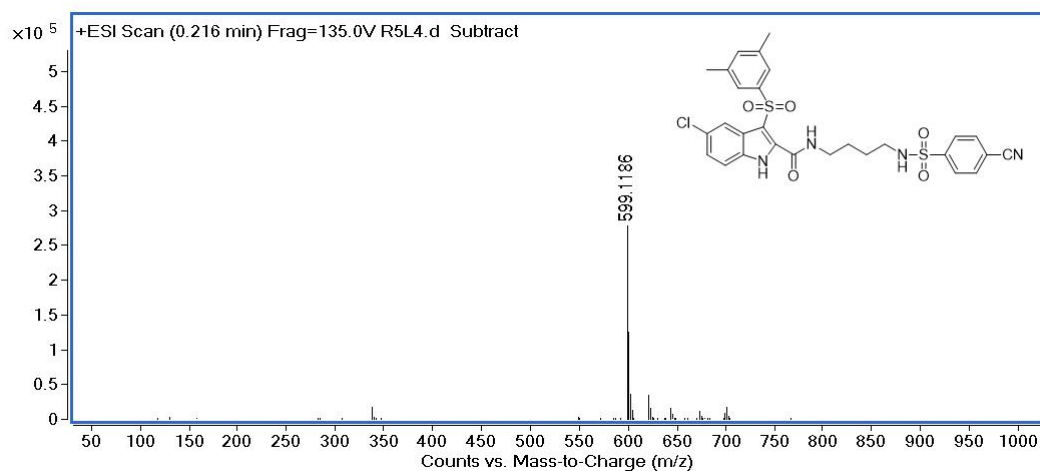

### HRMS spectrum of R<sub>5</sub>L<sub>5</sub>

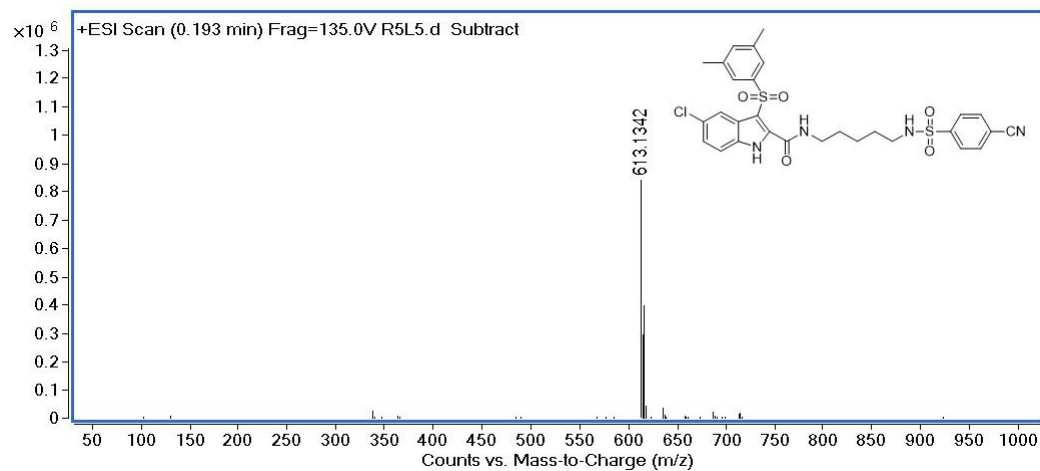

### HRMS spectra of R<sub>6</sub>L<sub>2</sub>

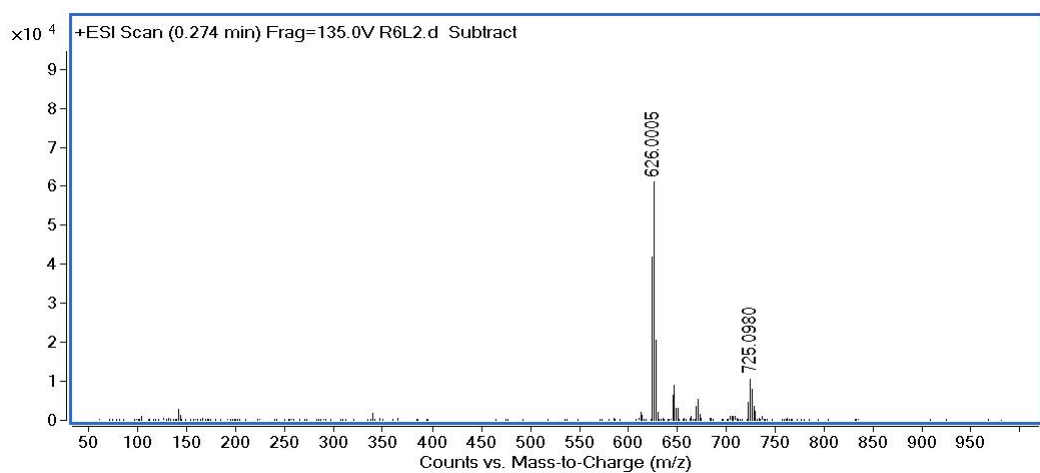

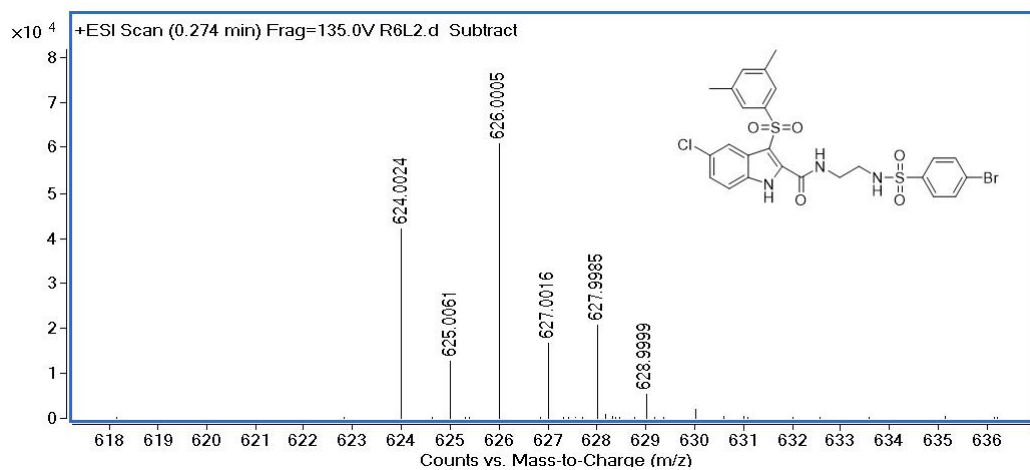

## HRMS spectra of R6L3

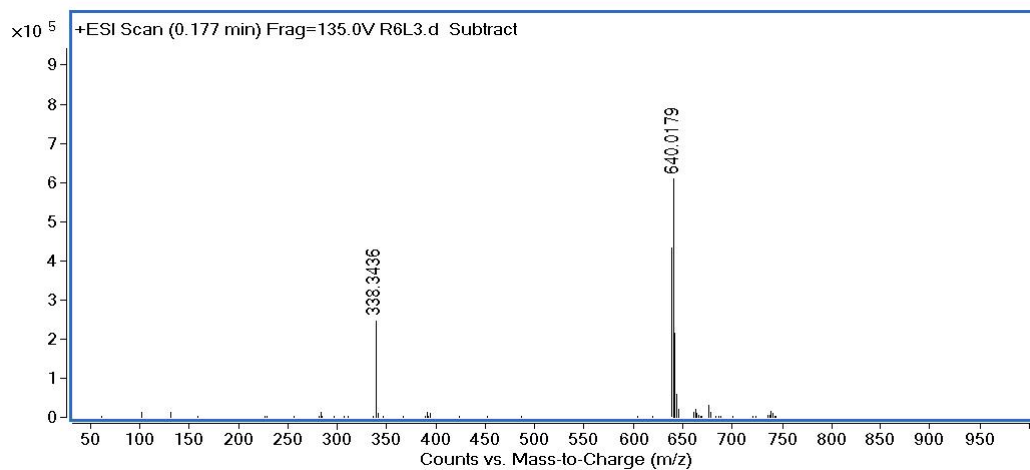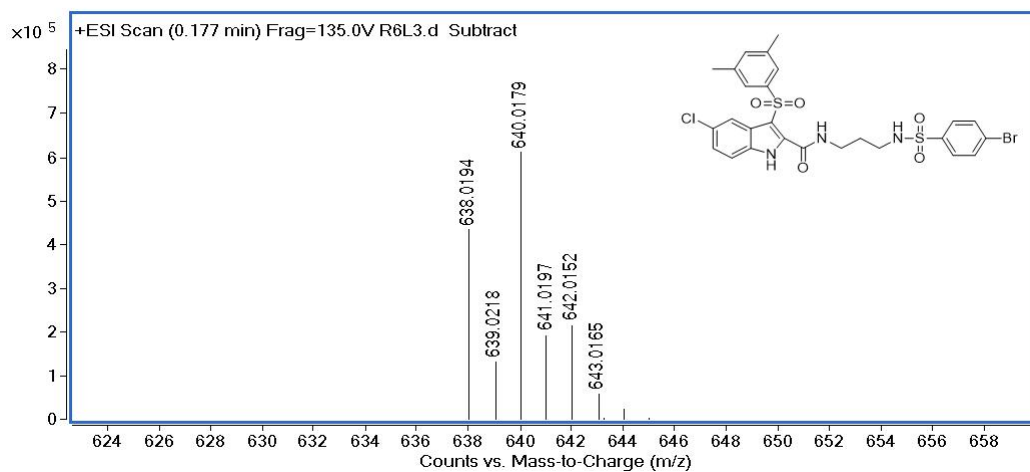

## HRMS spectra of R<sub>6</sub>L<sub>4</sub>

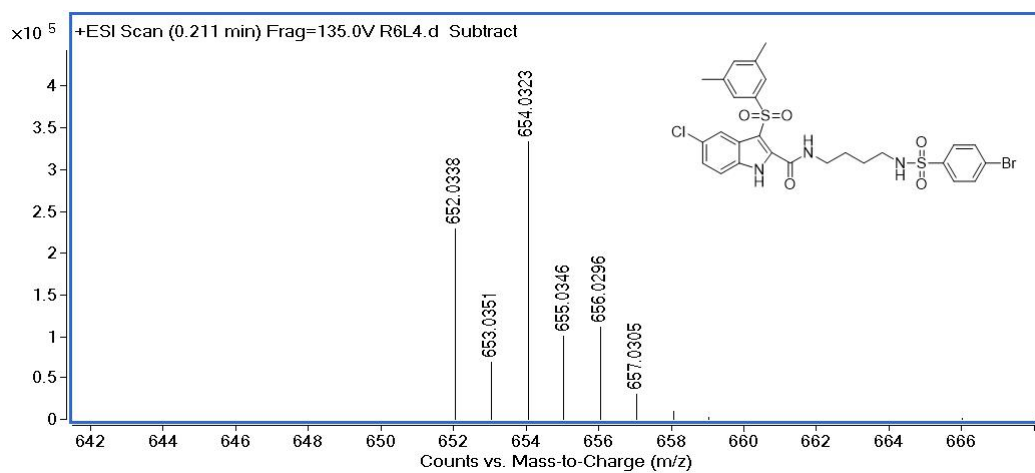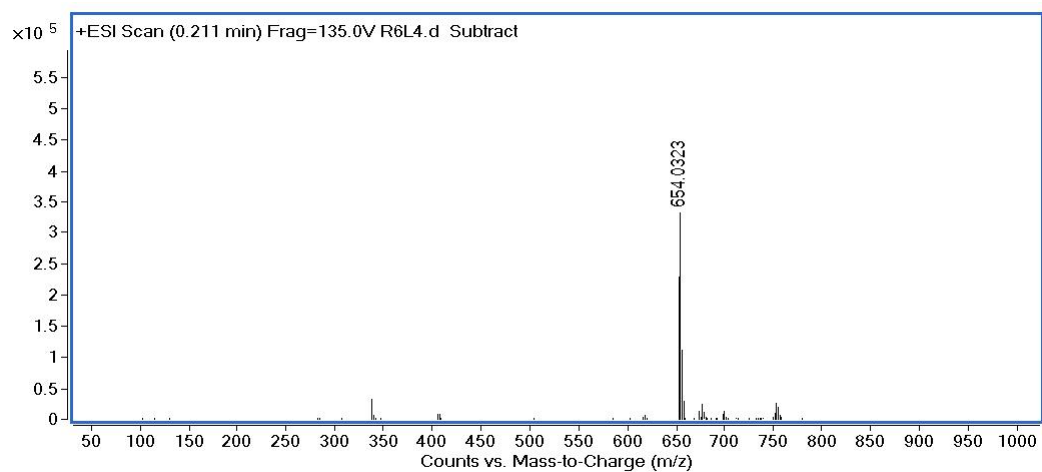

## HRMS spectra of R<sub>6</sub>L<sub>5</sub>

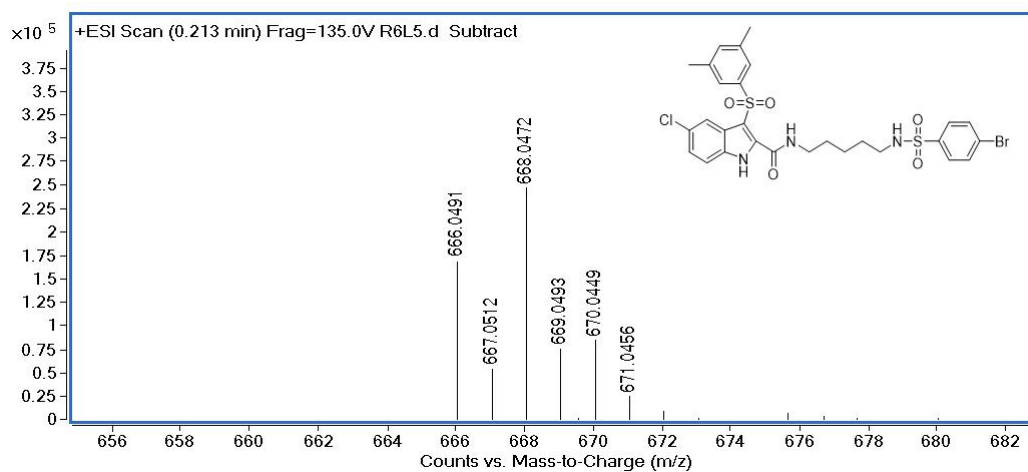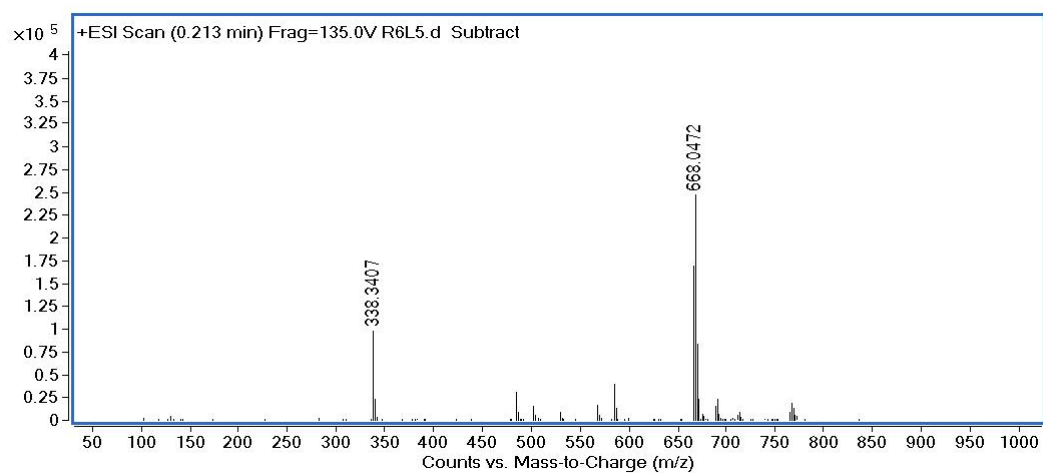

### HRMS spectrum of R<sub>7</sub>L<sub>2</sub>

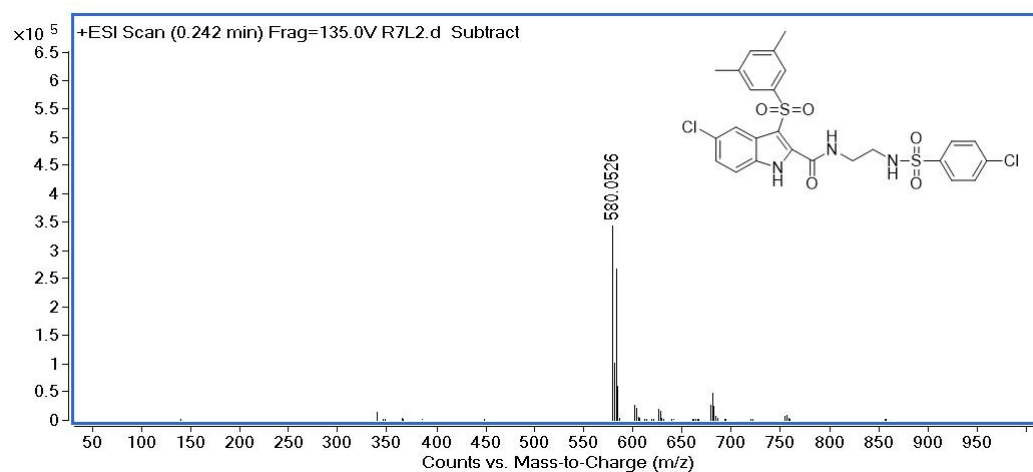

### HRMS spectrum of R<sub>7</sub>L<sub>3</sub>

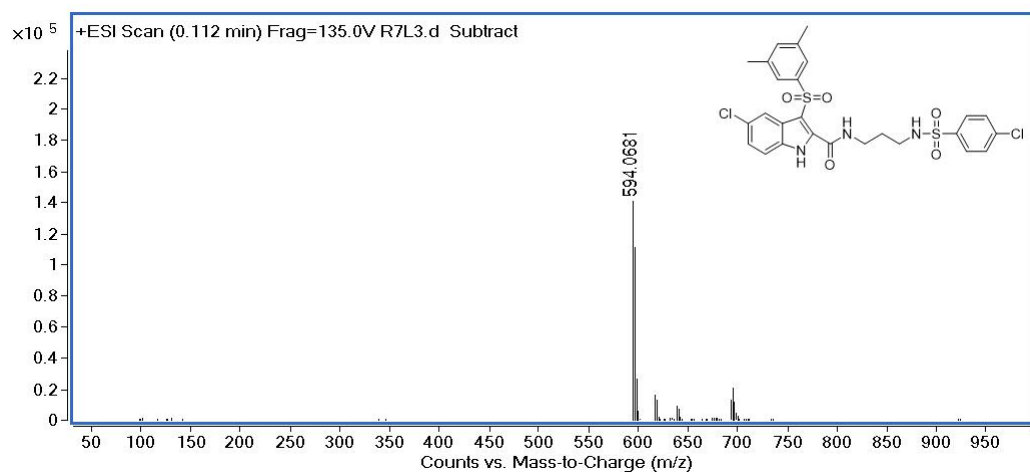

### HRMS spectrum of R<sub>7</sub>L<sub>4</sub>

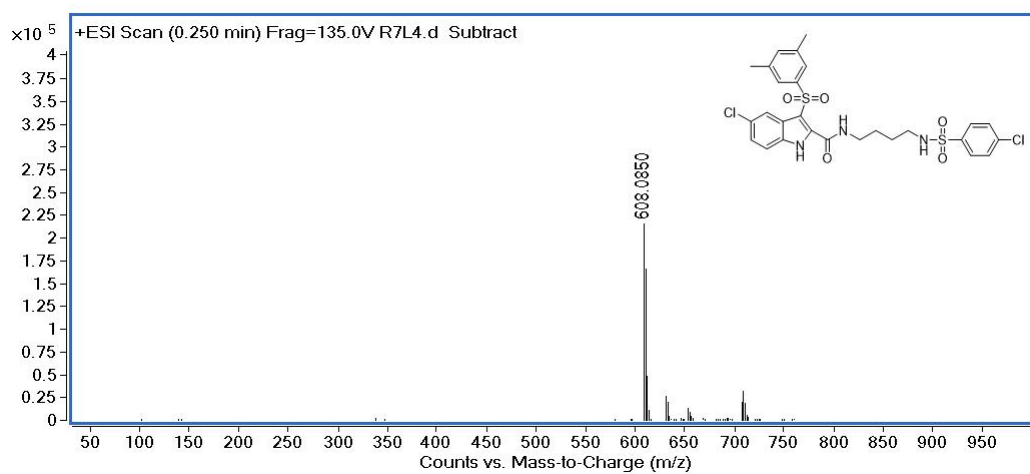

**HRMS spectrum of R<sub>7</sub>L<sub>5</sub>**

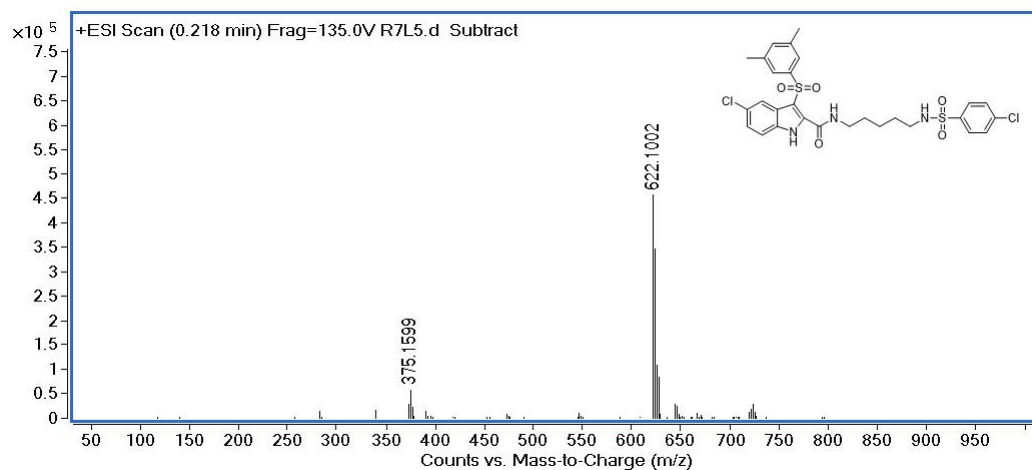

**HRMS spectrum of R<sub>8</sub>L<sub>2</sub>**

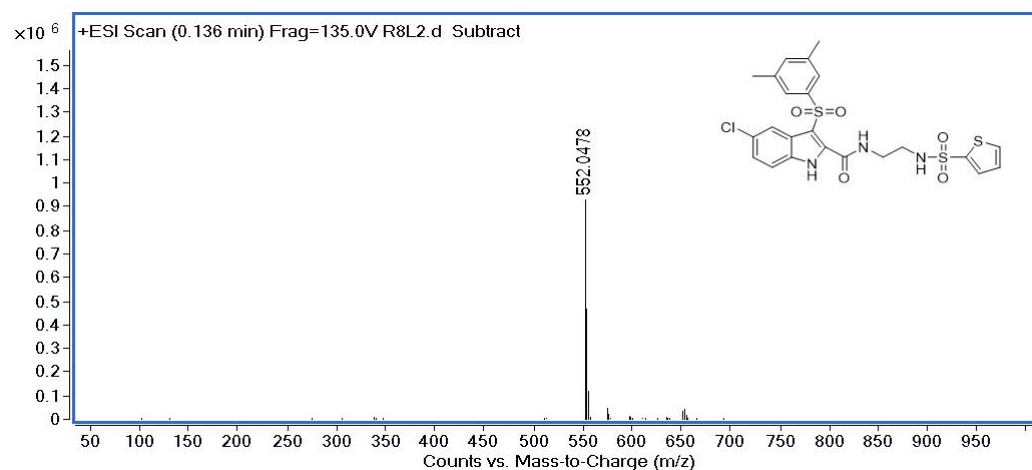

### HRMS spectrum of R<sub>8</sub>L<sub>3</sub>

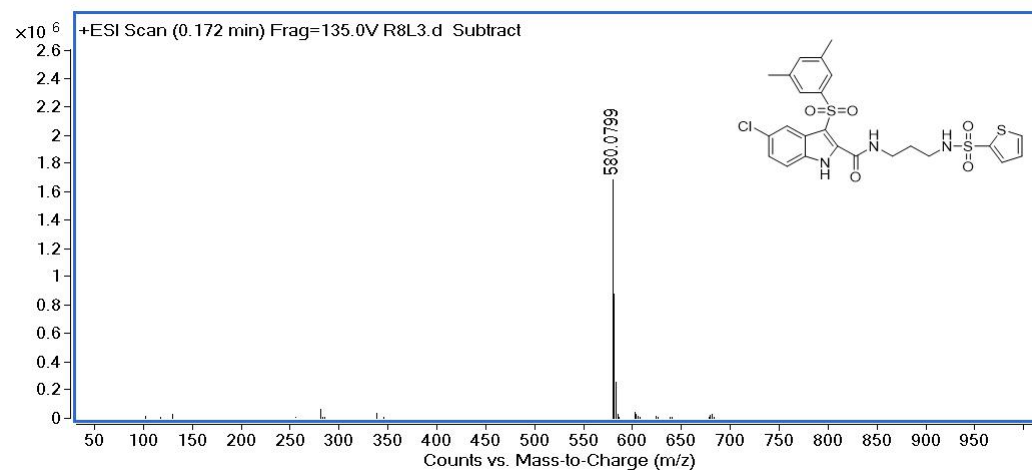

### HRMS spectrum of R<sub>8</sub>L<sub>4</sub>

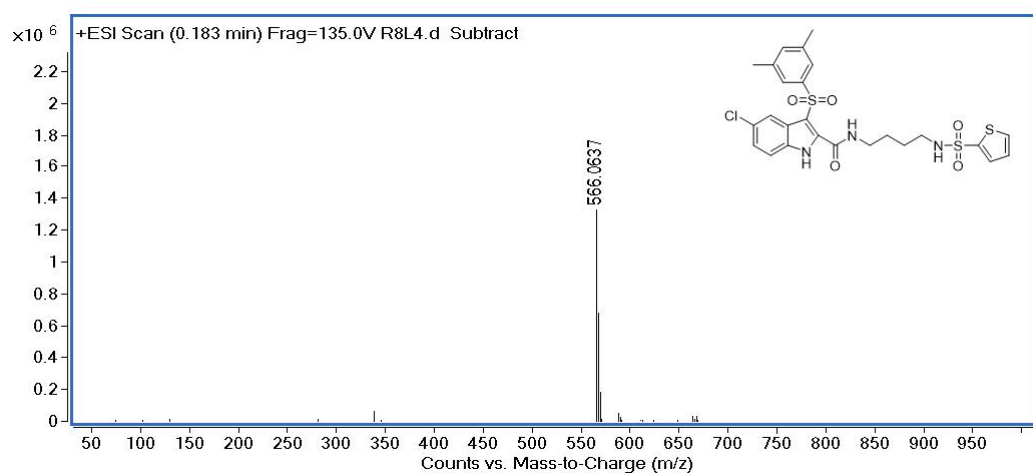

### HRMS spectrum of R<sub>8</sub>L<sub>5</sub>

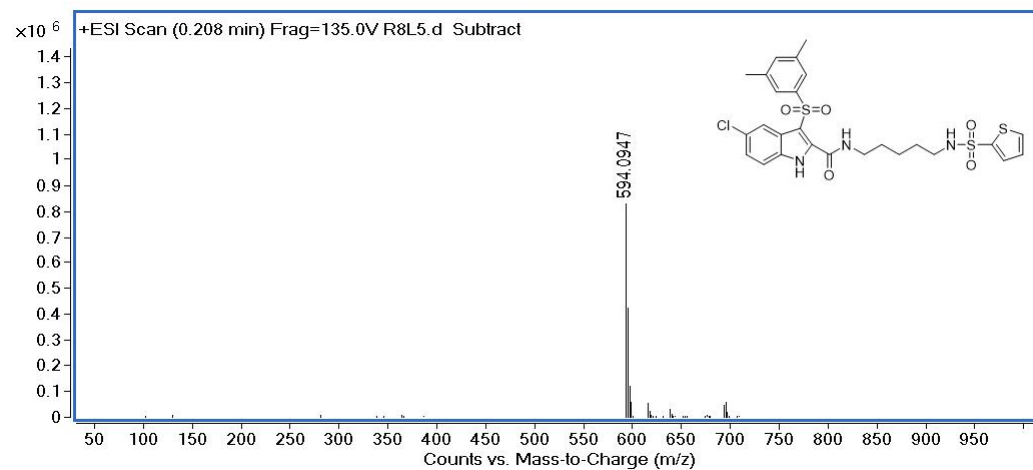

### HRMS spectrum of R<sub>9</sub>L<sub>2</sub>

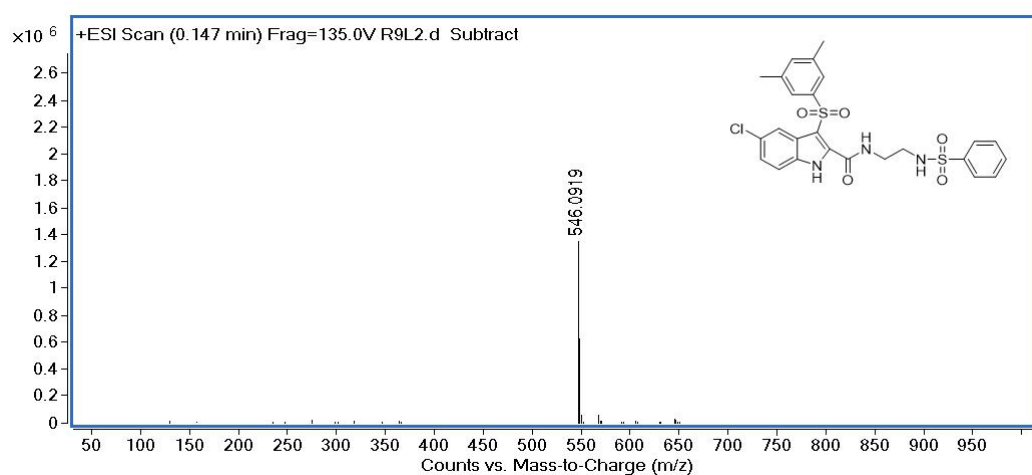

### HRMS spectrum of R<sub>9</sub>L<sub>3</sub>

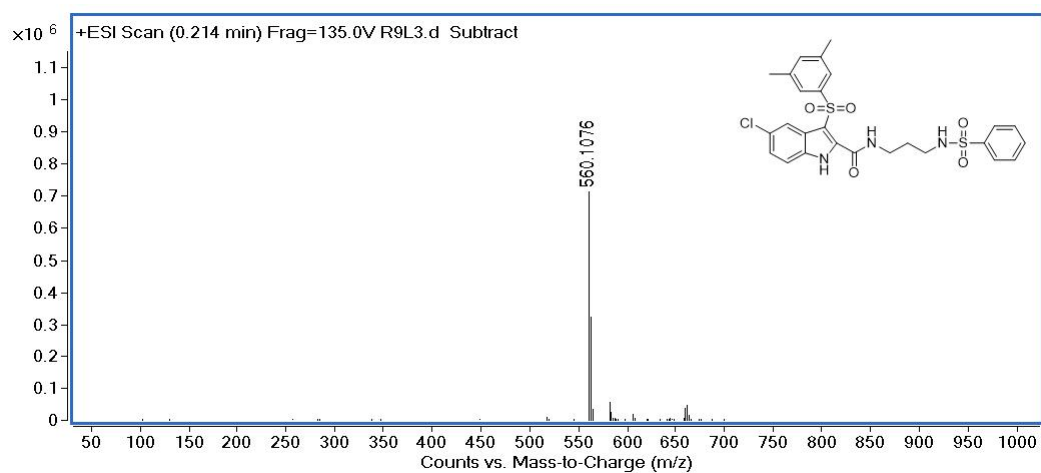

### HRMS spectrum of R<sub>9</sub>L<sub>4</sub>

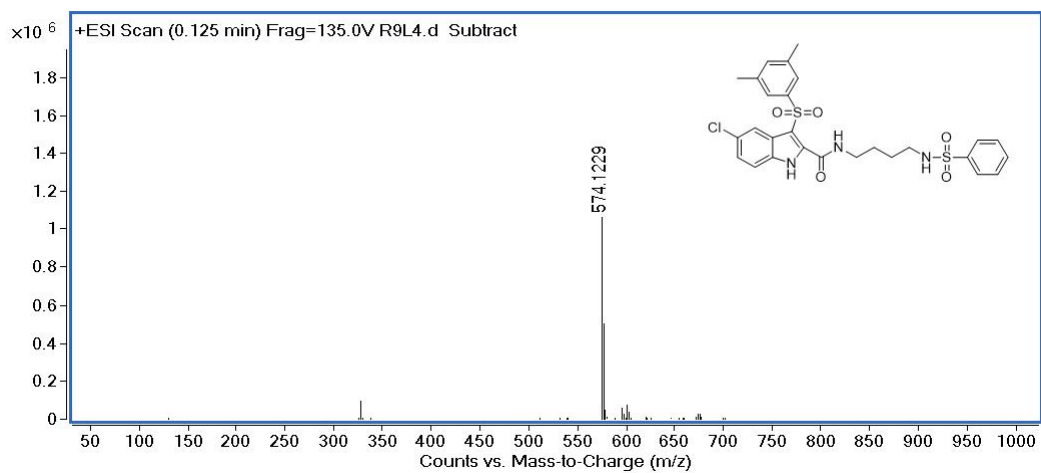

### HRMS spectrum of R<sub>9</sub>L<sub>5</sub>

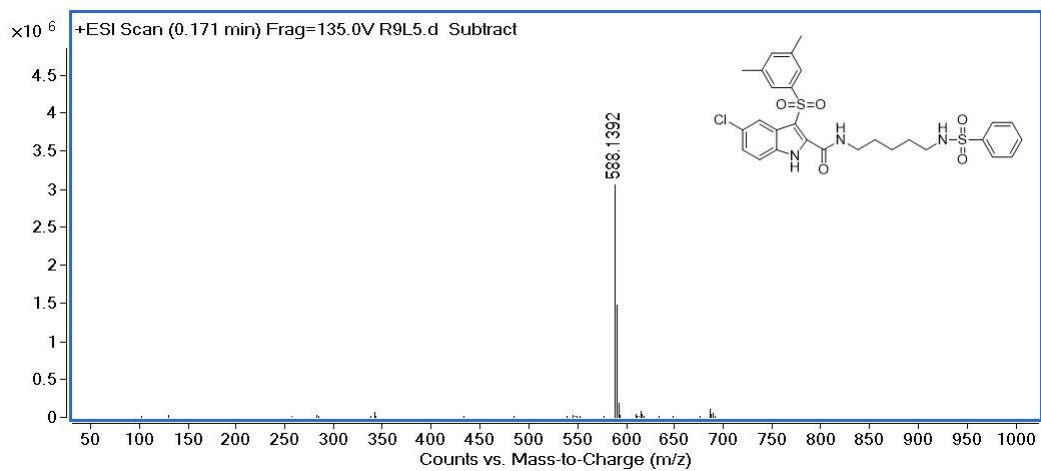

### HRMS spectrum of R<sub>10</sub>L<sub>2</sub>

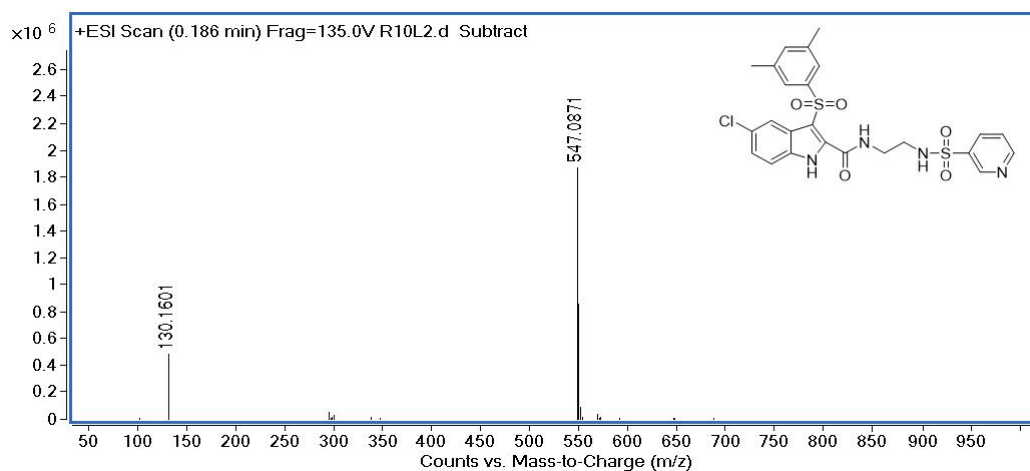

### HRMS spectrum of R<sub>10</sub>L<sub>3</sub>

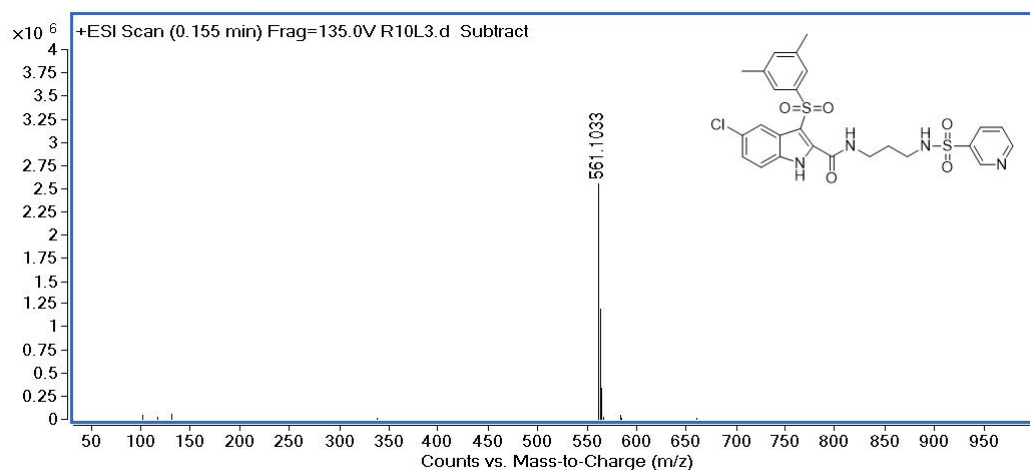

### HRMS spectrum of R<sub>10</sub>L<sub>4</sub>

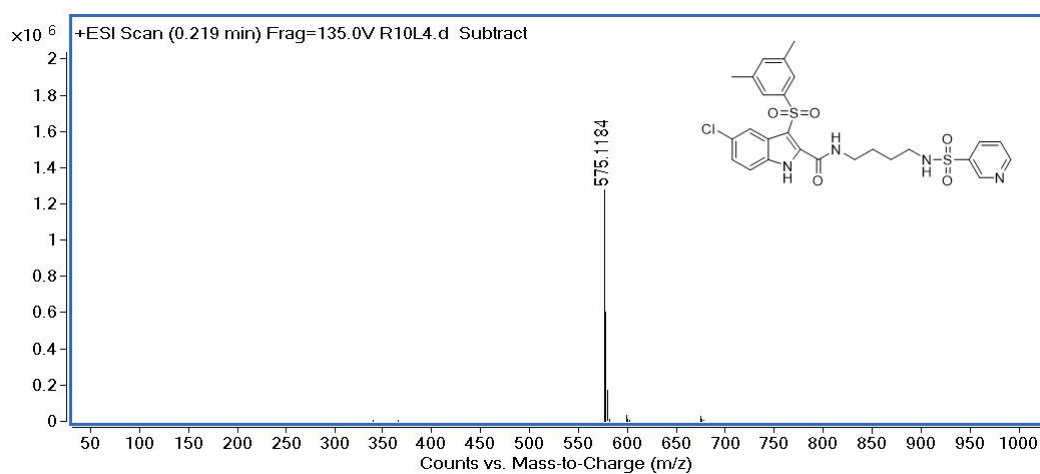

### HRMS spectrum of R<sub>10</sub>L<sub>5</sub>

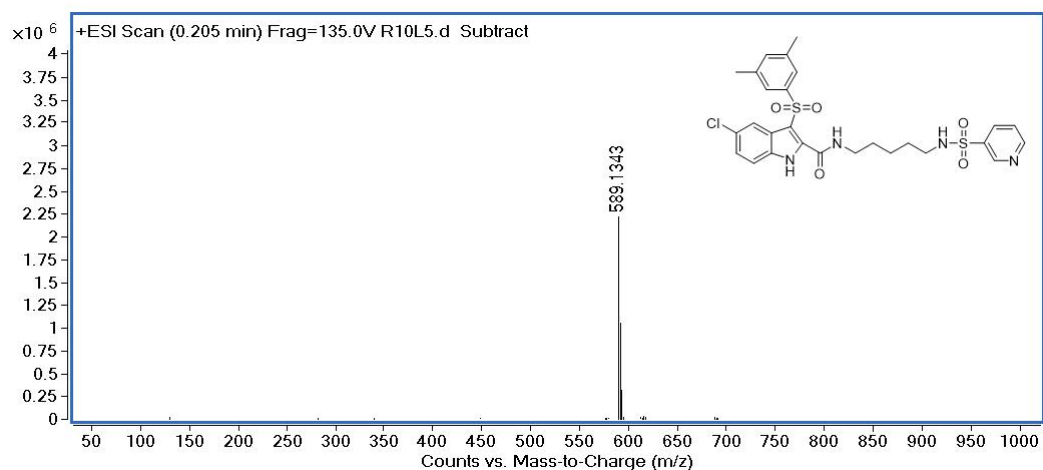

### HRMS spectrum of R<sub>11</sub>L<sub>2</sub>

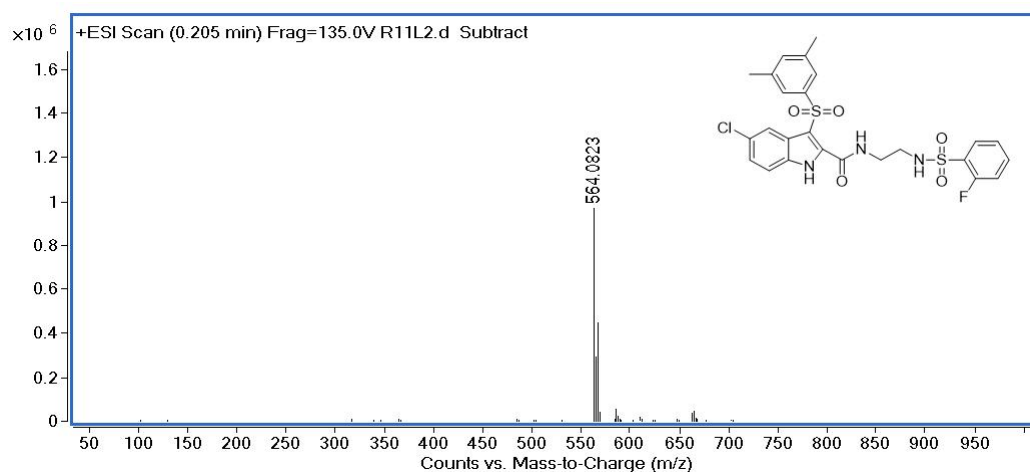

### HRMS spectrum of R<sub>11</sub>L<sub>3</sub>

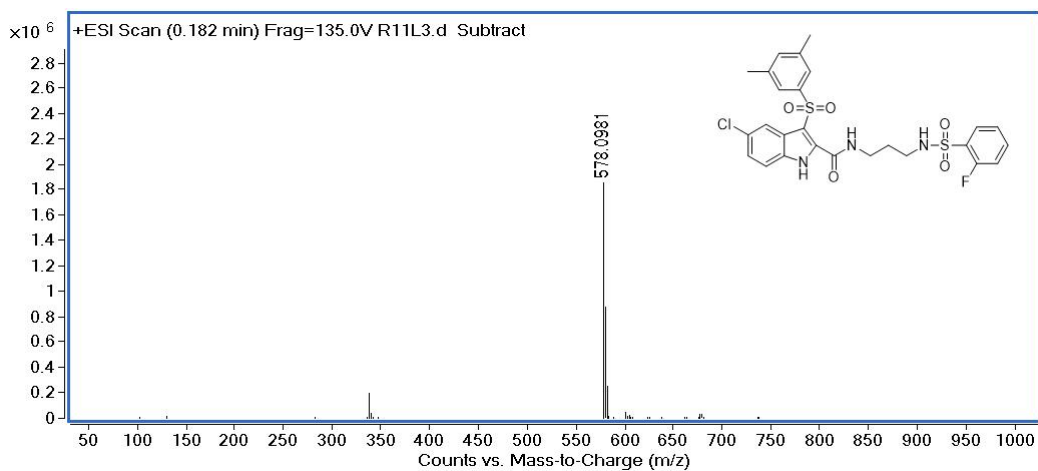

### HRMS spectrum of R<sub>11</sub>L<sub>4</sub>

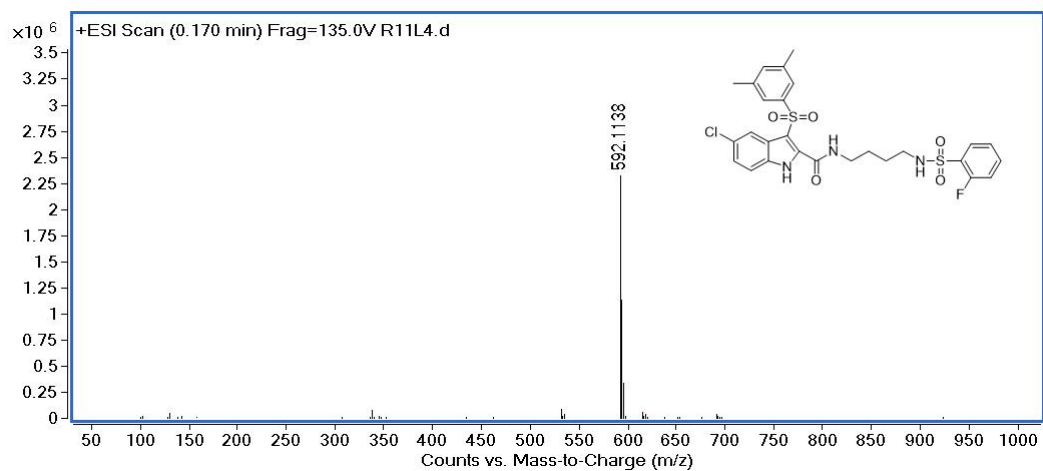

### HRMS spectrum of R<sub>12</sub>L<sub>2</sub>

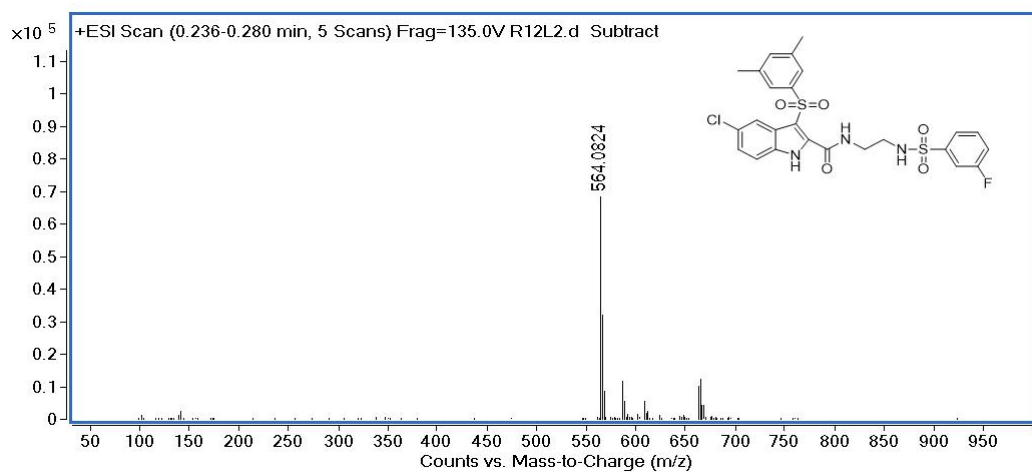

### HRMS spectrum of R<sub>12</sub>L<sub>3</sub>

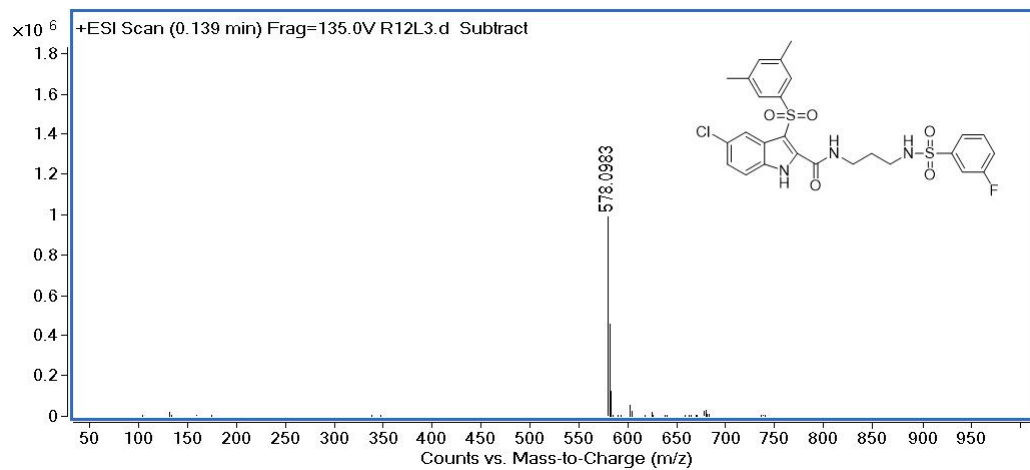

### HRMS spectrum of R<sub>12</sub>L<sub>4</sub>

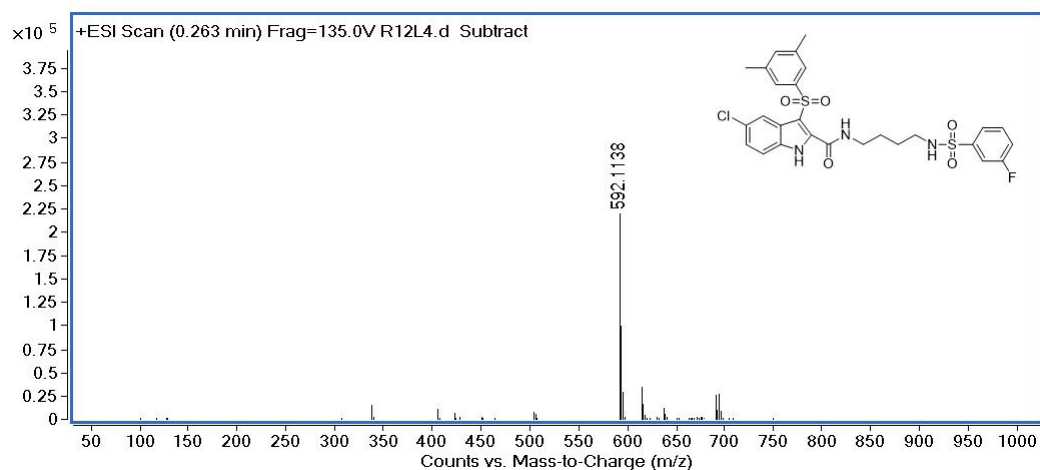

### HRMS spectrum of R<sub>13</sub>L<sub>2</sub>

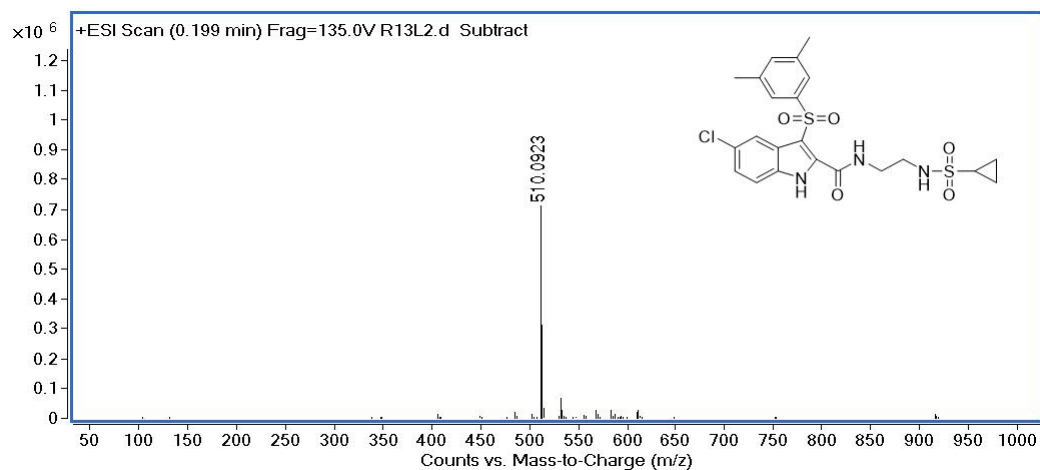

### HRMS spectrum of R<sub>14</sub>L<sub>2</sub>

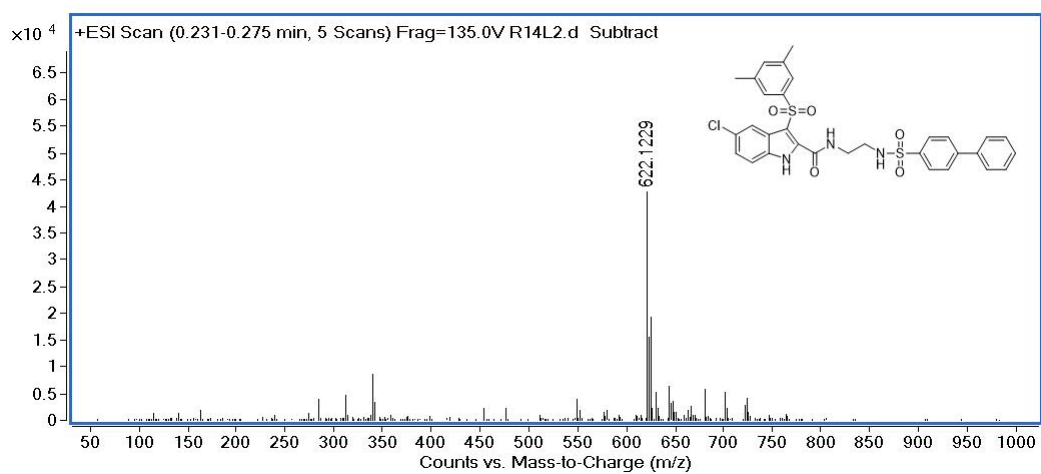

## HPLC trace of representative final compounds

### HPLC trace of $R_2L_2$

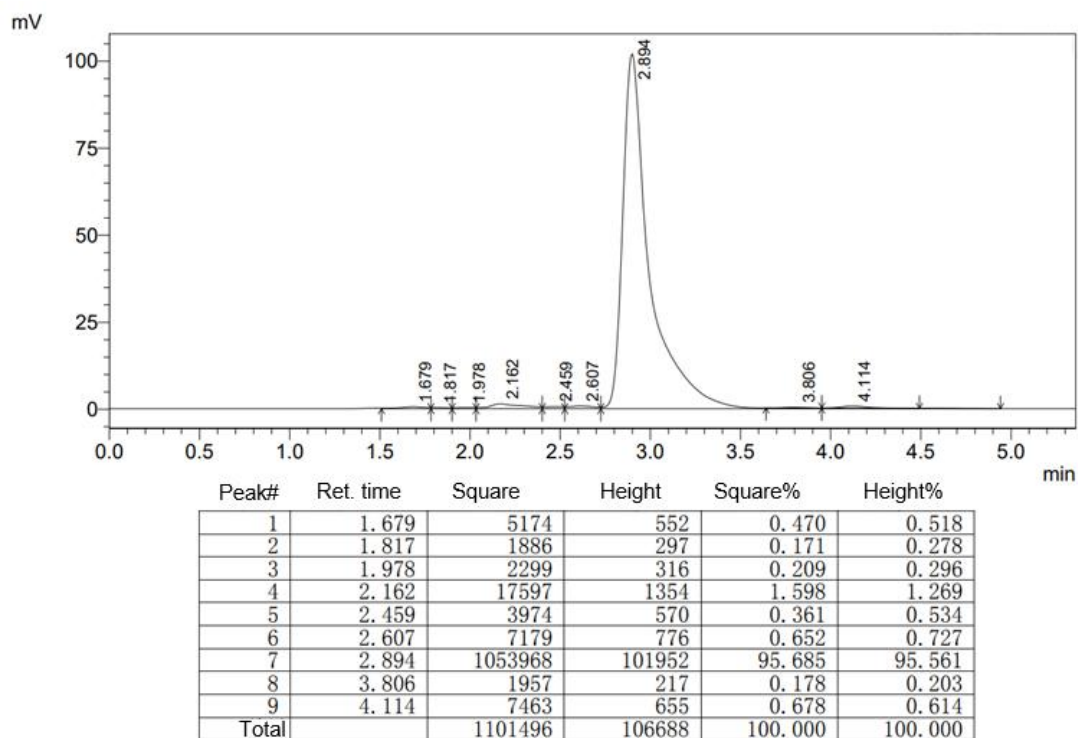

### HPLC trace of $R_2L_4$

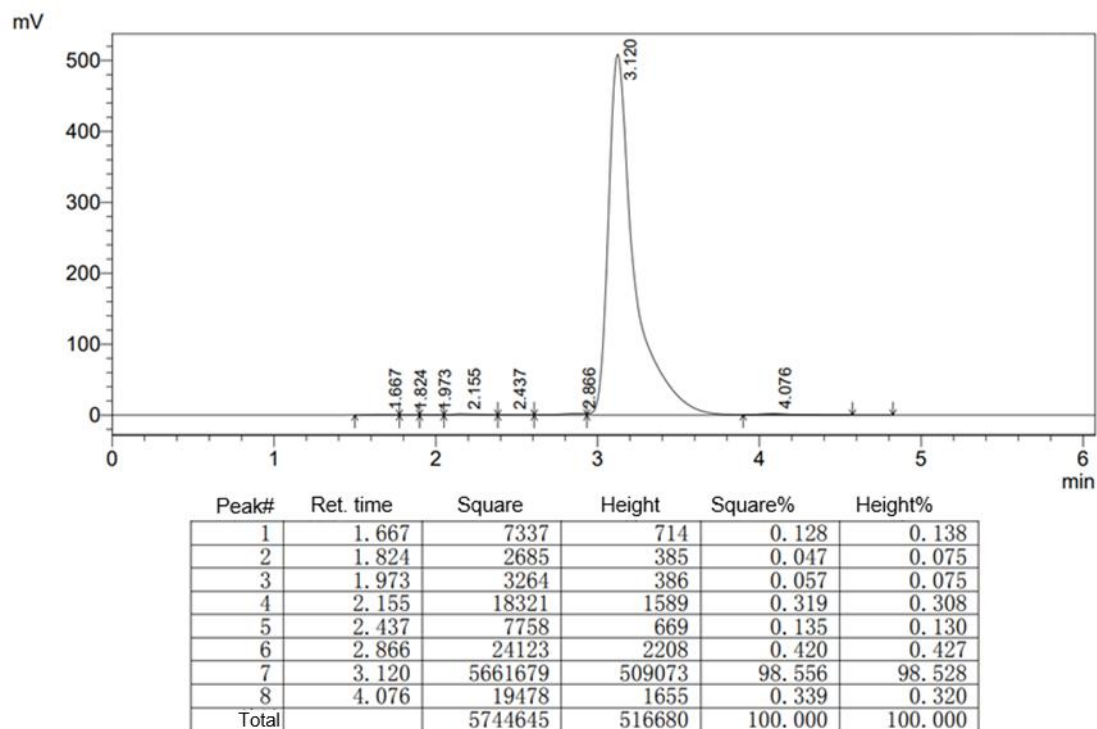

## HPLC trace of $R_2L_5$

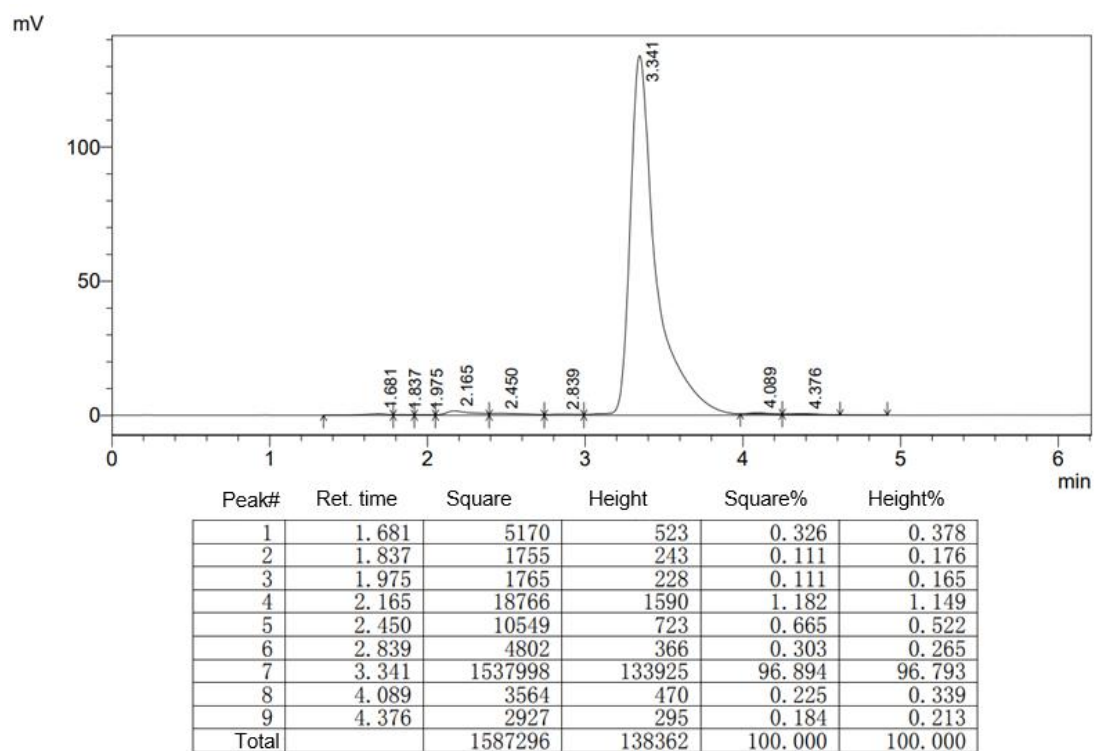

## HPLC trace of $R_3L_2$

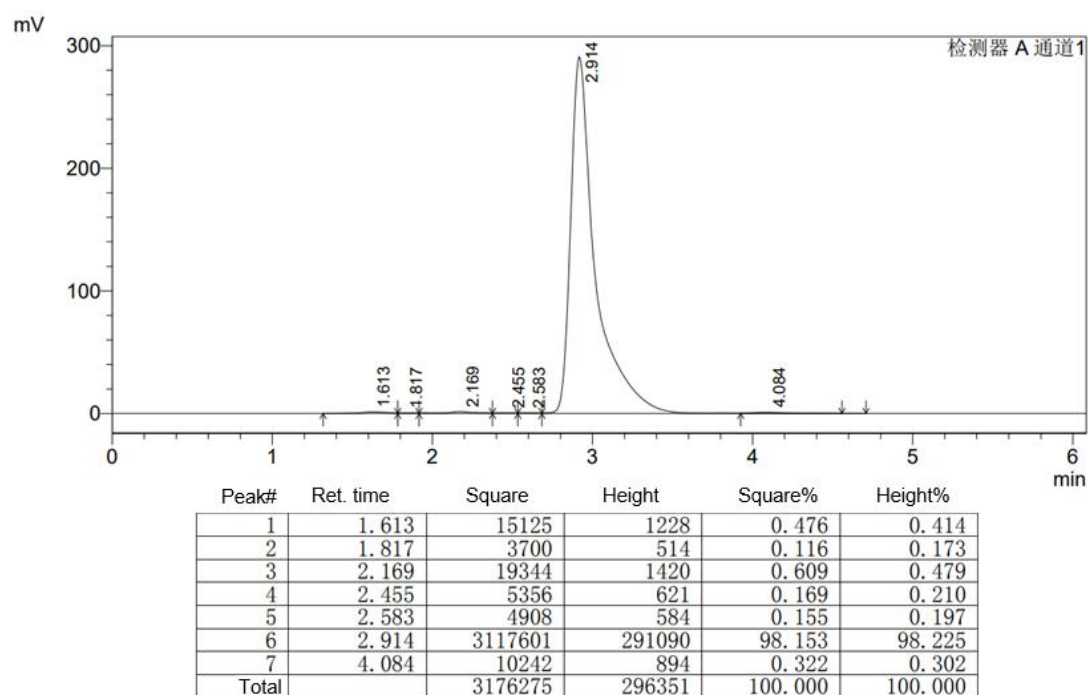

### HPLC trace of **R<sub>3</sub>L<sub>4</sub>**

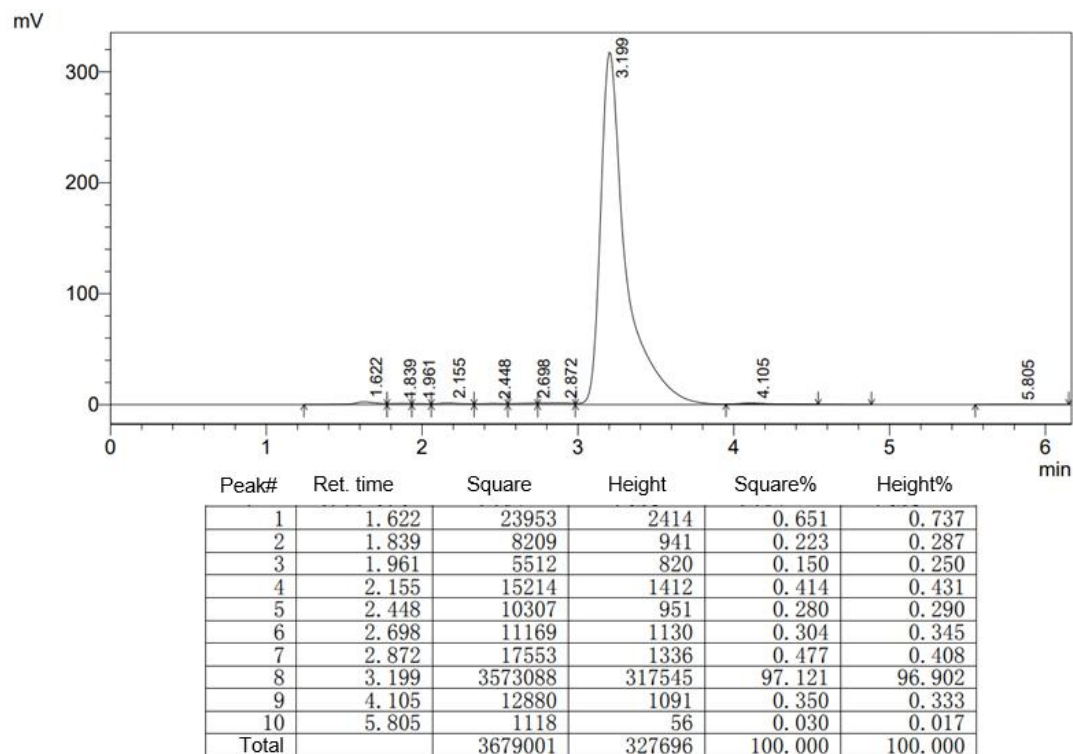

### HPLC trace of **R<sub>3</sub>L<sub>5</sub>**

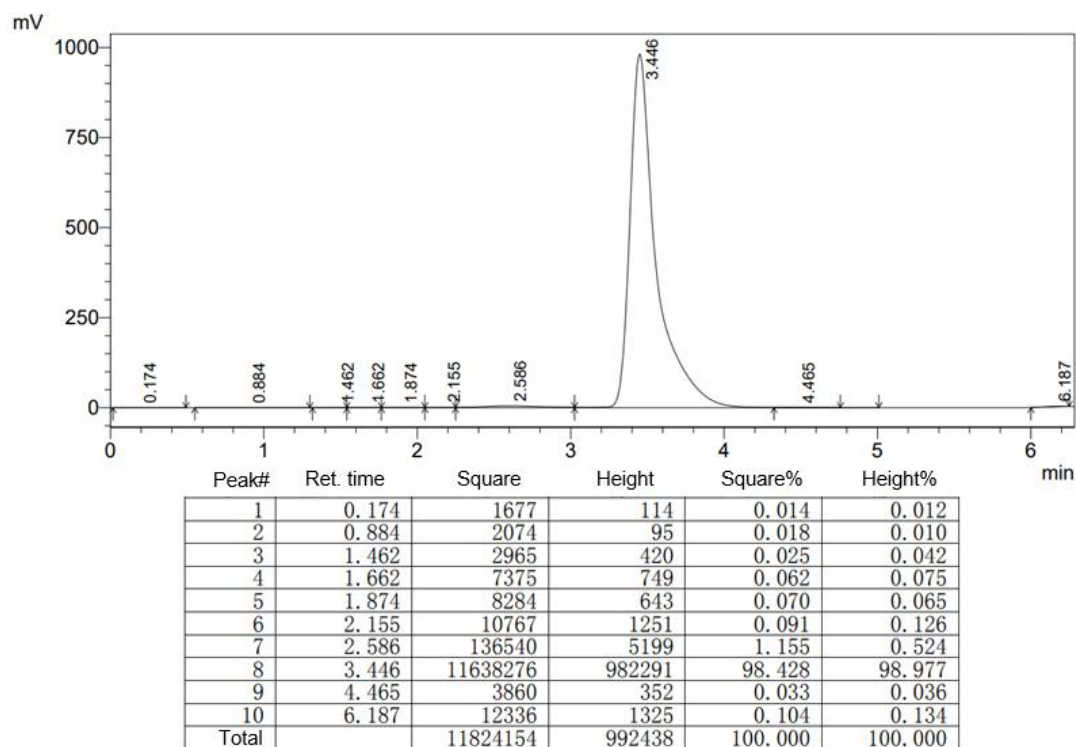

## HPLC trace of $R_4L_2$

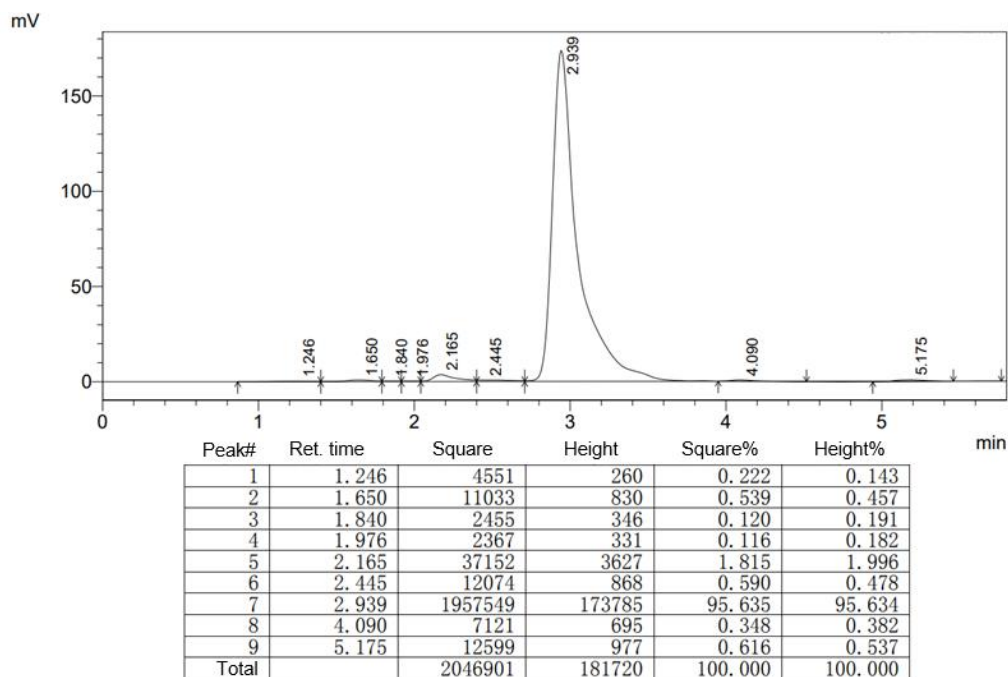

## HPLC trace of $R_4L_4$

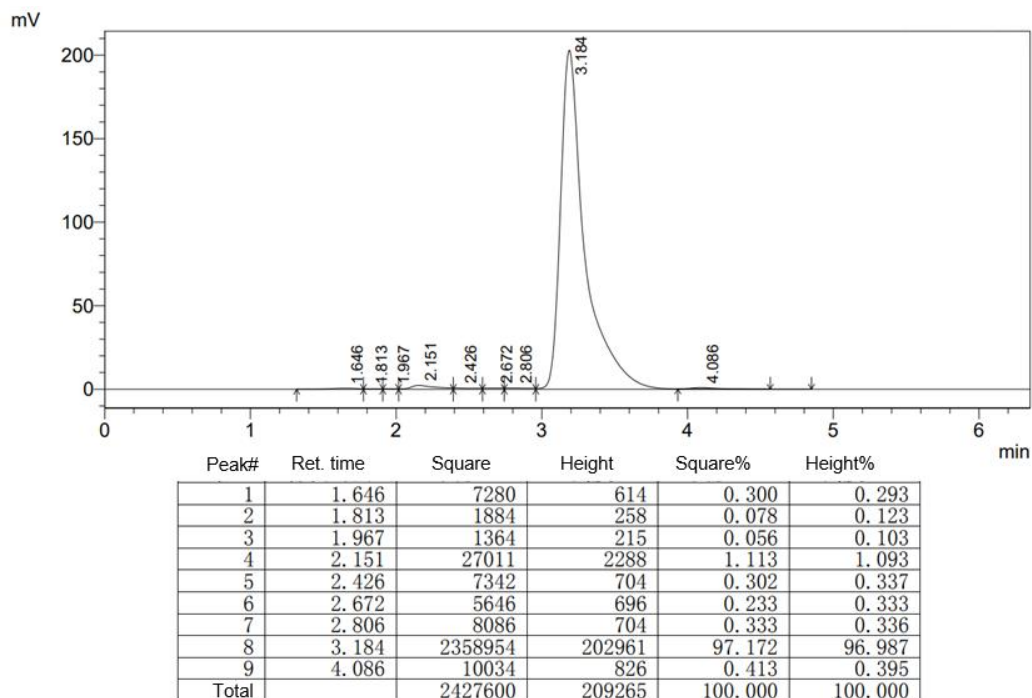

## HPLC trace of $R_5L_2$

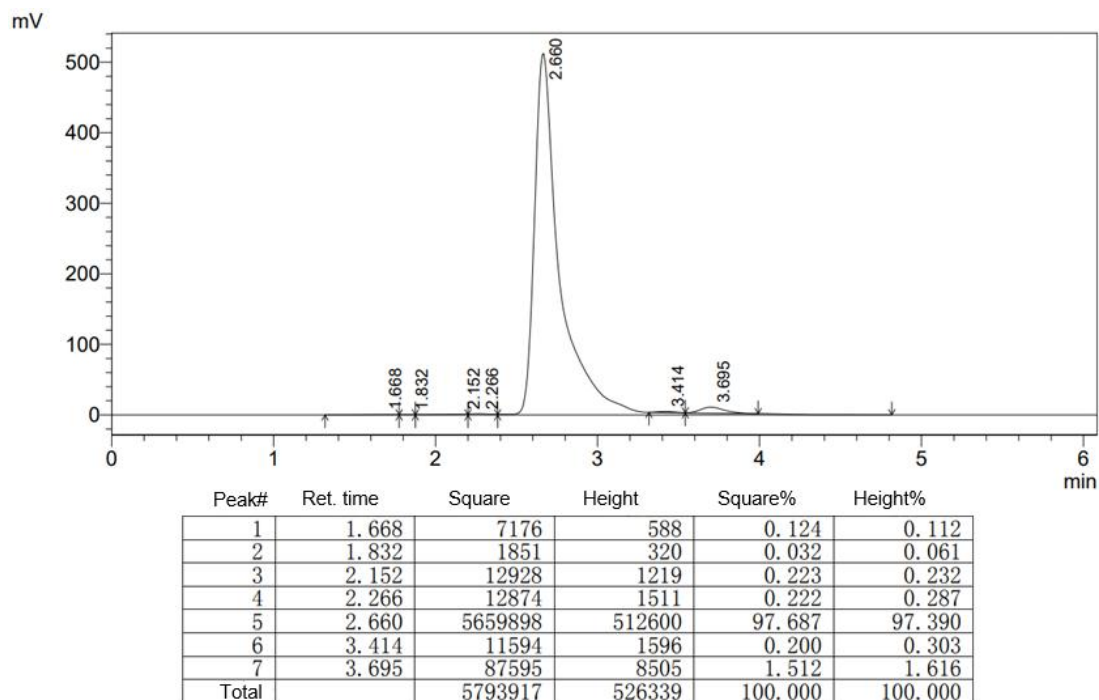

## HPLC trace of $R_5L_3$

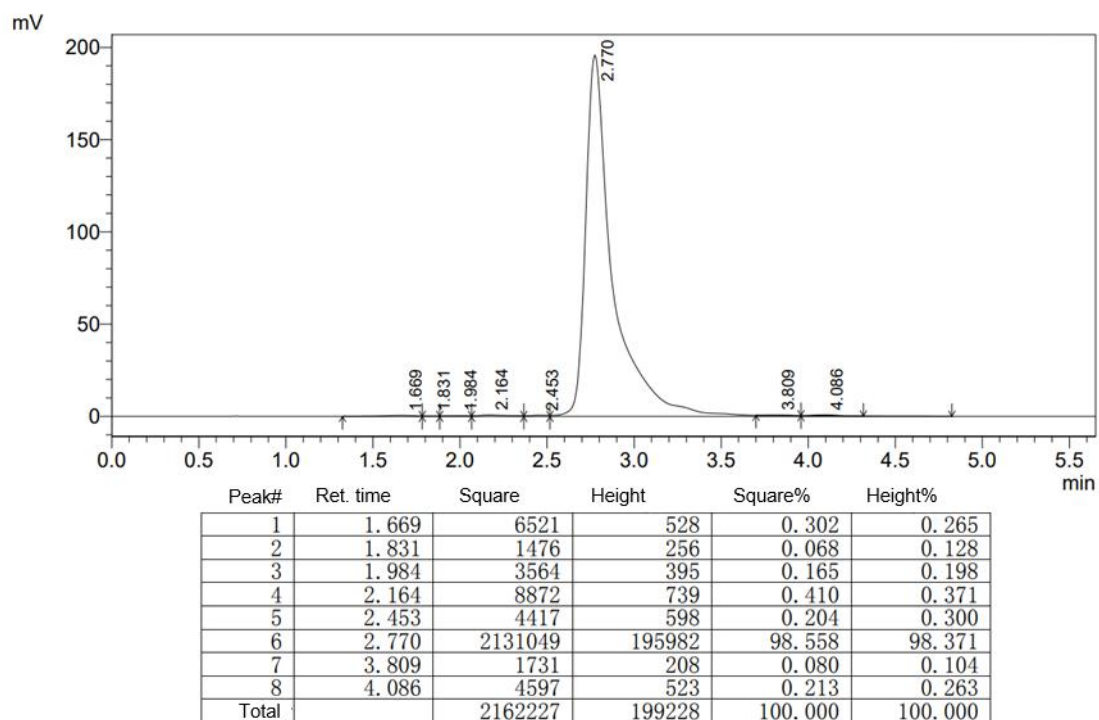

## HPLC trace of **R<sub>5</sub>L<sub>5</sub>**

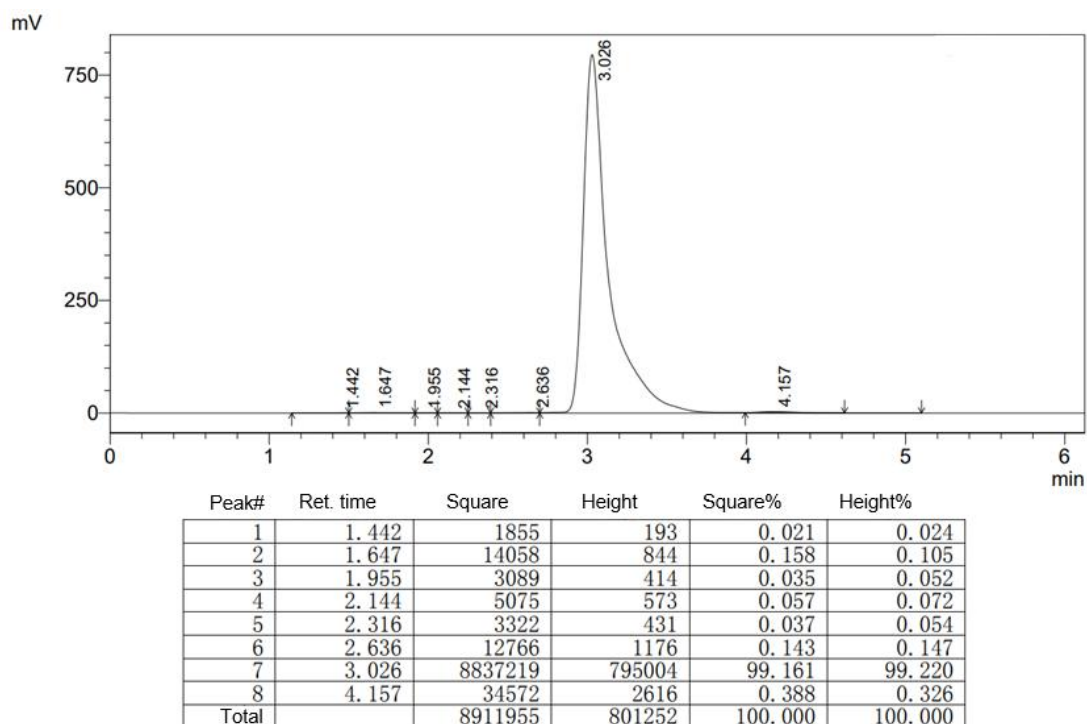

## HPLC trace of **R<sub>6</sub>L<sub>2</sub>**

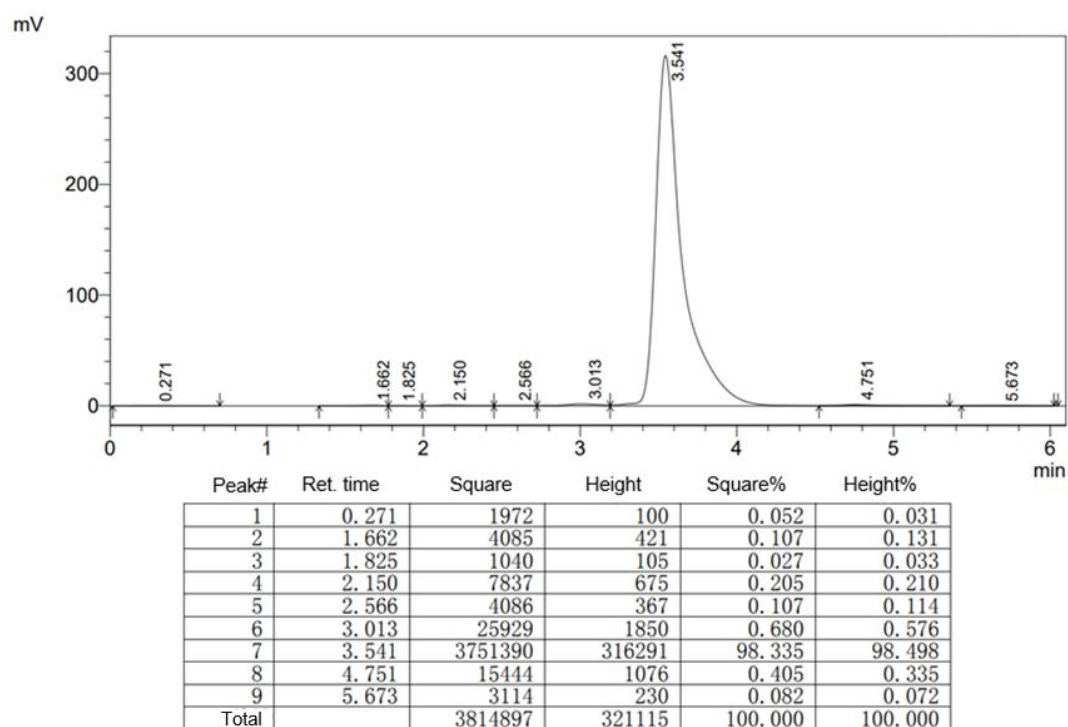

### HPLC trace of $R_6L_3$

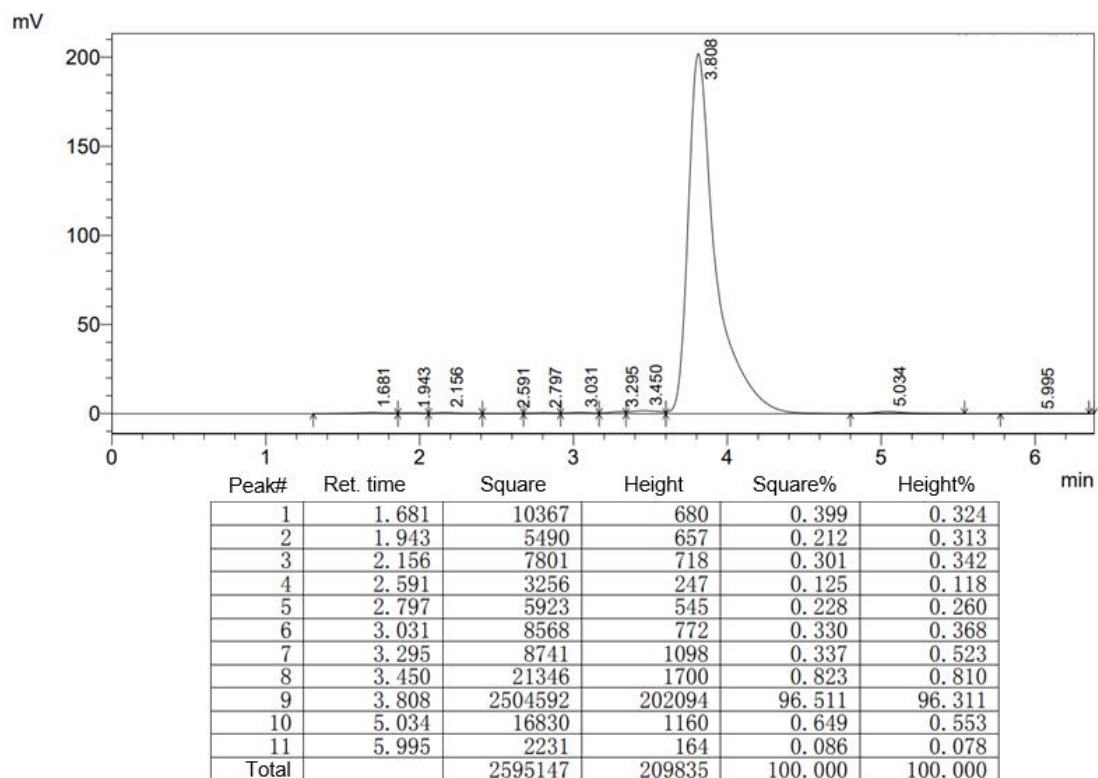

### HPLC trace of $R_6L_4$

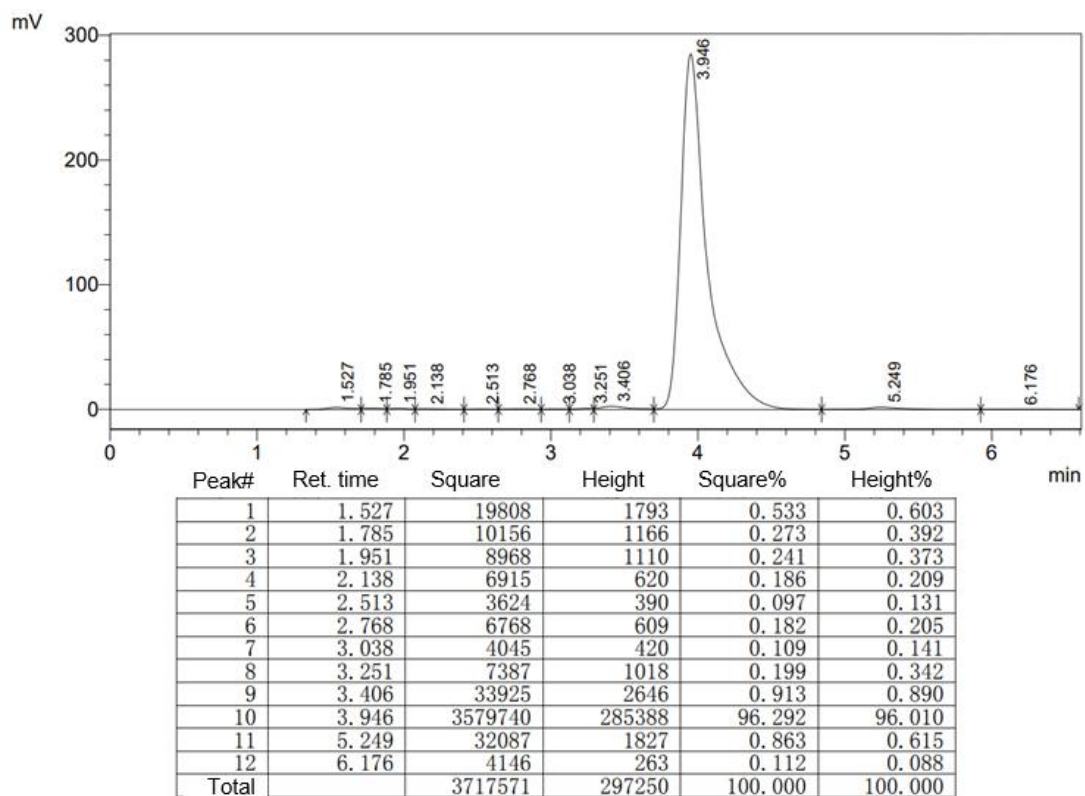

## HPLC trace of **R<sub>7</sub>L<sub>2</sub>**

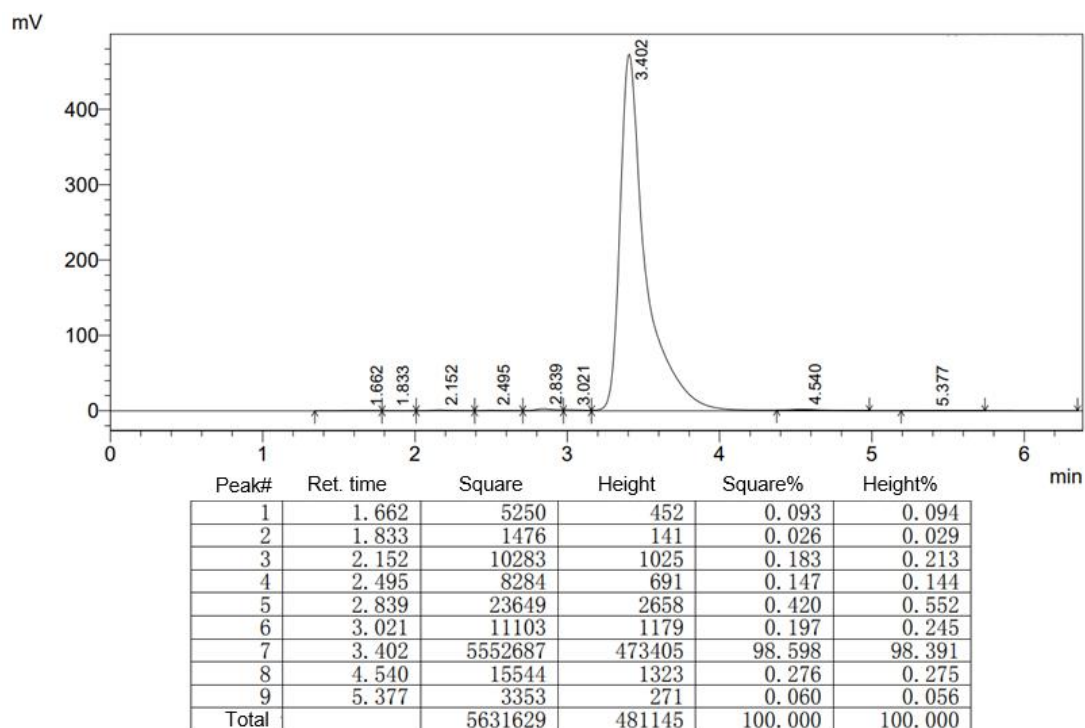

## HPLC trace of **R<sub>7</sub>L<sub>4</sub>**

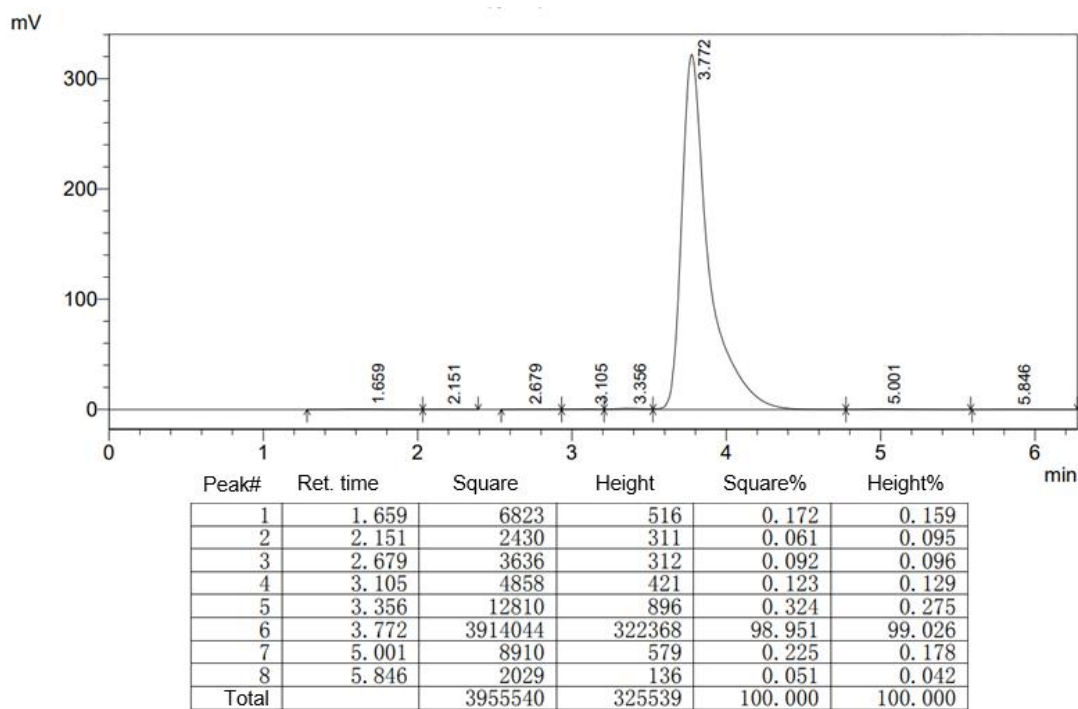

## HPLC trace of **R<sub>8</sub>L<sub>2</sub>**

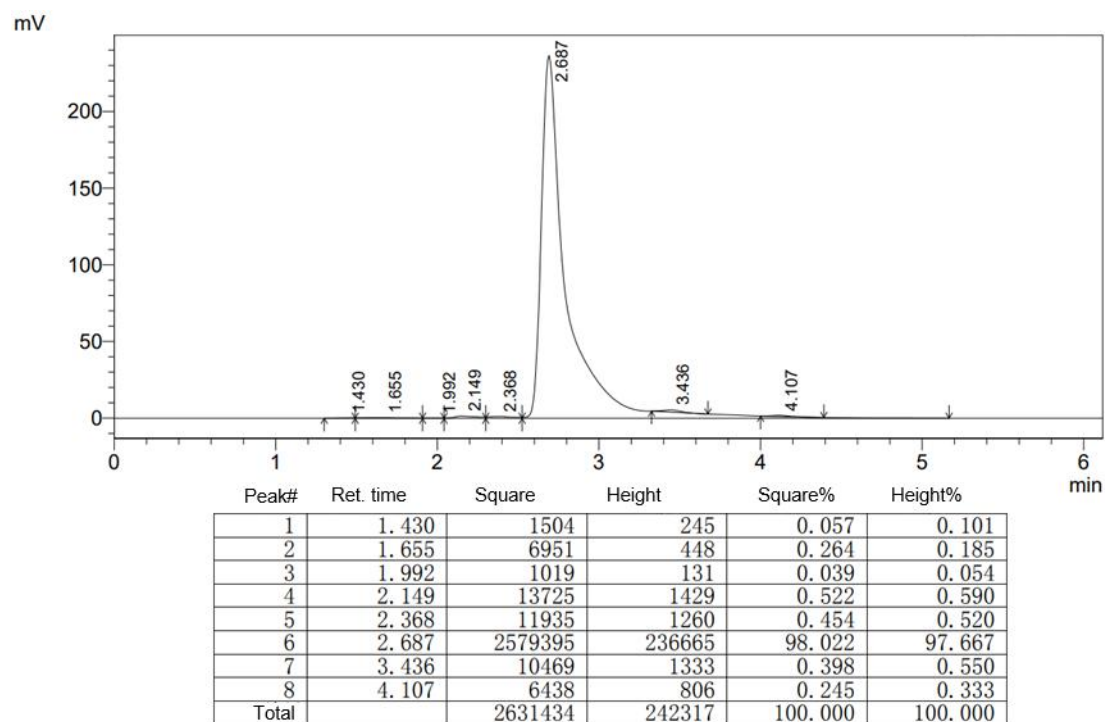

## HPLC trace of **R<sub>8</sub>L<sub>3</sub>**

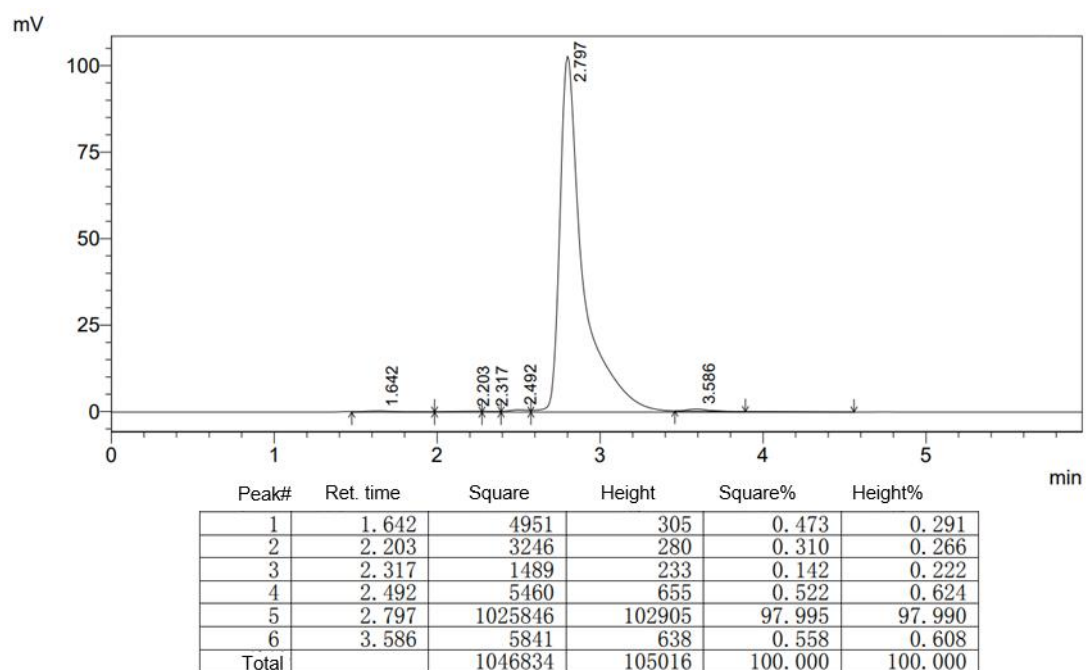

## HPLC trace of **R<sub>8</sub>L<sub>4</sub>**

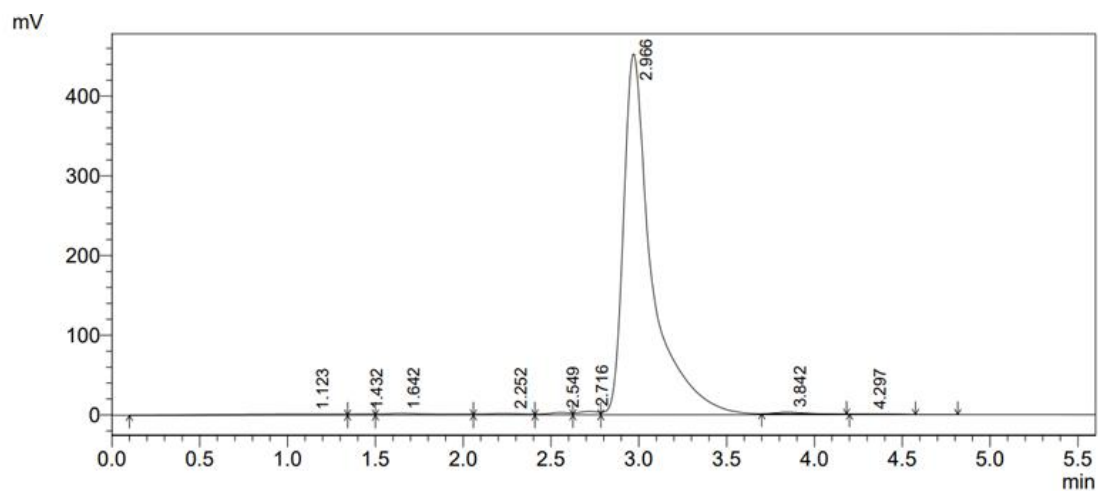

| Peak# | Ret. time | Square  | Height | Square% | Height% |
|-------|-----------|---------|--------|---------|---------|
| 1     | 1.123     | 58048   | 1236   | 1.086   | 0.263   |
| 2     | 1.432     | 12364   | 1387   | 0.231   | 0.296   |
| 3     | 1.642     | 46213   | 2052   | 0.865   | 0.437   |
| 4     | 2.252     | 29076   | 1758   | 0.544   | 0.375   |
| 5     | 2.549     | 28317   | 3074   | 0.530   | 0.656   |
| 6     | 2.716     | 34732   | 4400   | 0.650   | 0.938   |
| 7     | 2.966     | 5108807 | 452638 | 95.612  | 96.513  |
| 8     | 3.842     | 23002   | 2171   | 0.430   | 0.463   |
| 9     | 4.297     | 2704    | 274    | 0.051   | 0.058   |
| Total |           | 5343263 | 468990 | 100.000 | 100.000 |

## HPLC trace of **R<sub>8</sub>L<sub>5</sub>**

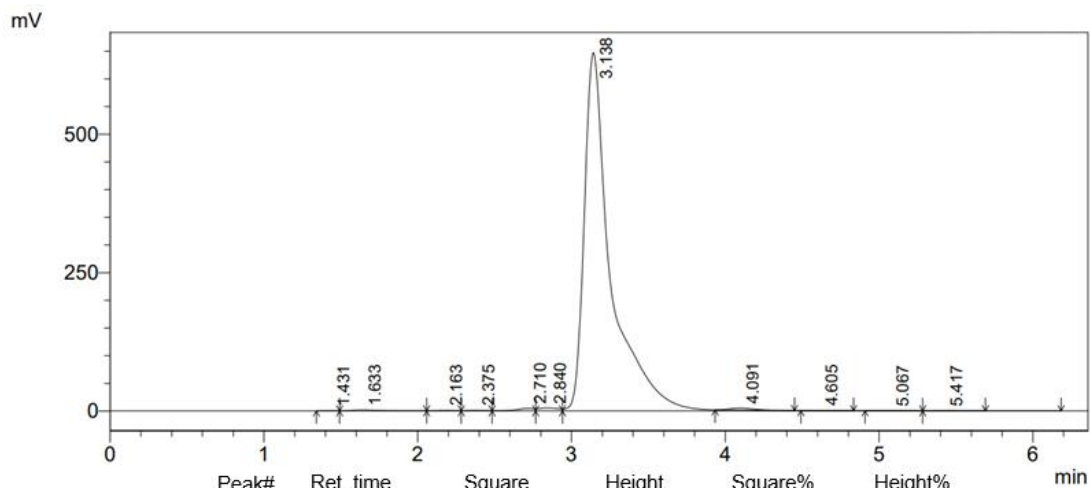

| Peak# | Ret. time | Square  | Height | Square% | Height% |
|-------|-----------|---------|--------|---------|---------|
| 1     | 1.431     | 2271    | 381    | 0.029   | 0.057   |
| 2     | 1.633     | 23404   | 1627   | 0.294   | 0.245   |
| 3     | 2.163     | 6964    | 750    | 0.087   | 0.113   |
| 4     | 2.375     | 9053    | 994    | 0.114   | 0.149   |
| 5     | 2.710     | 38322   | 4512   | 0.481   | 0.678   |
| 6     | 2.840     | 48300   | 5333   | 0.606   | 0.802   |
| 7     | 3.138     | 7795194 | 647362 | 97.811  | 97.319  |
| 8     | 4.091     | 39965   | 3668   | 0.501   | 0.551   |
| 9     | 4.605     | 3607    | 384    | 0.045   | 0.058   |
| 10    | 5.067     | 1400    | 109    | 0.018   | 0.016   |
| 11    | 5.417     | 1156    | 76     | 0.015   | 0.011   |
| Total |           | 7969637 | 665195 | 100.000 | 100.000 |

### HPLC trace of **R<sub>9</sub>L<sub>2</sub>**

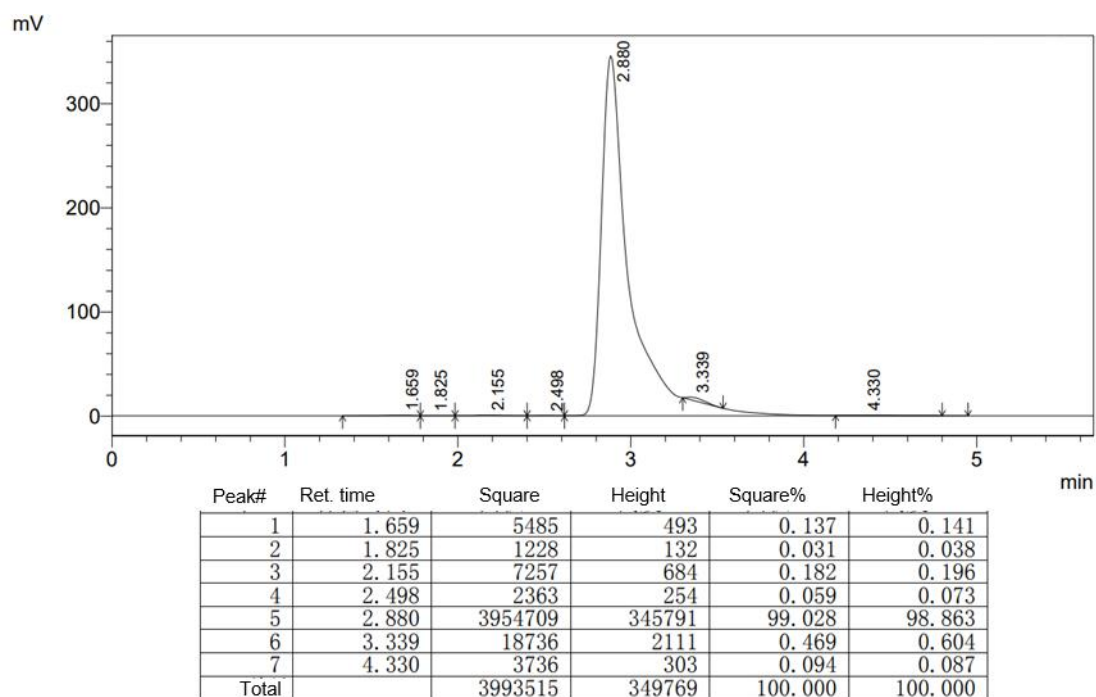

### HPLC trace of **R<sub>9</sub>L<sub>3</sub>**

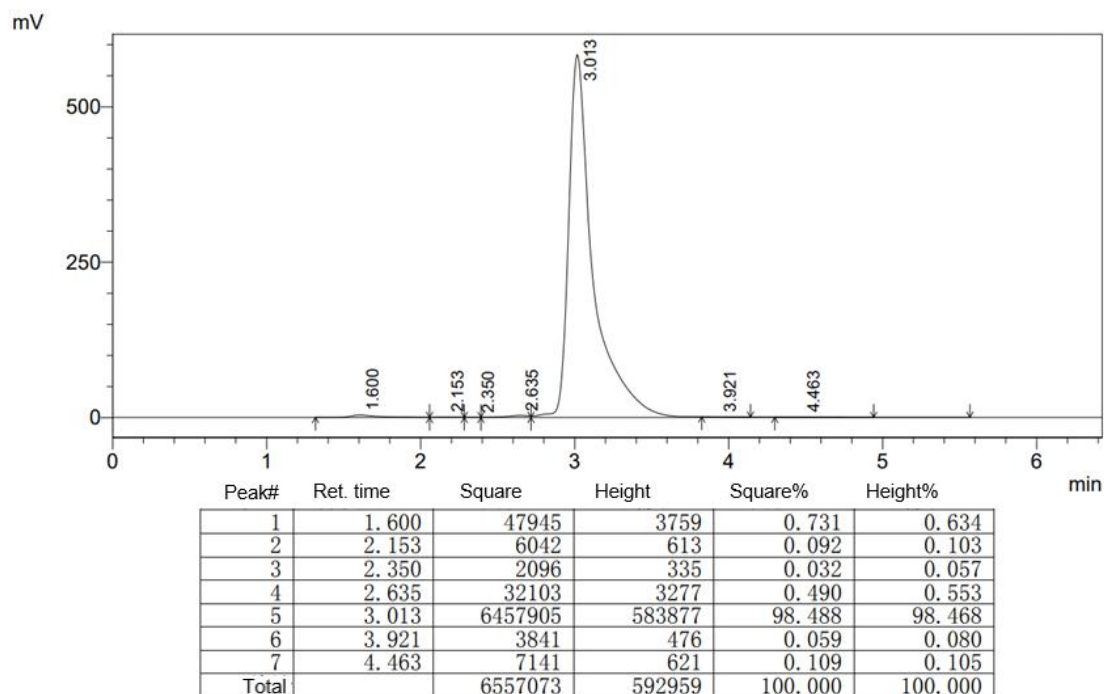

## HPLC trace of **R<sub>9</sub>L<sub>5</sub>**

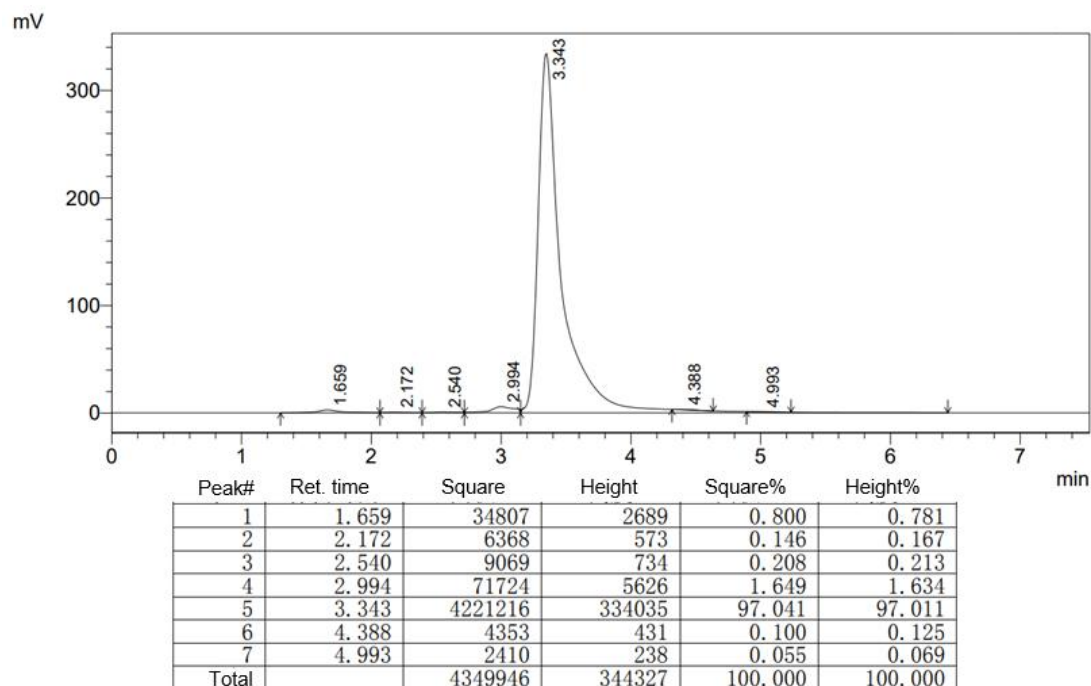

## HPLC trace of **R<sub>10</sub>L<sub>2</sub>**

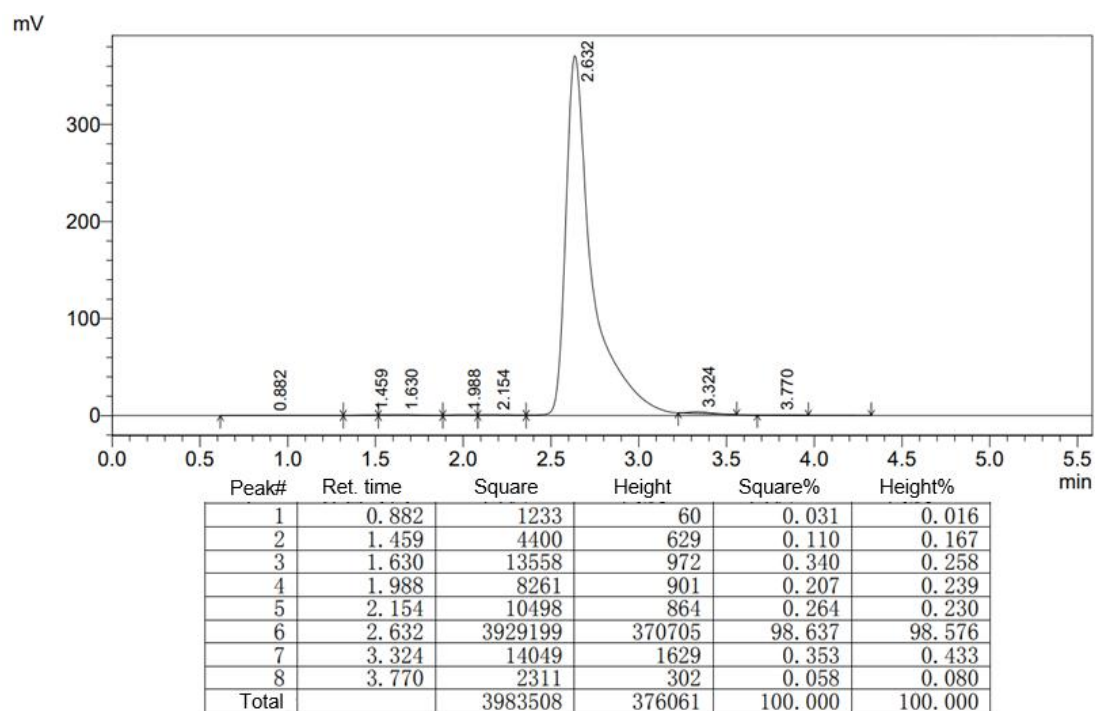

### HPLC trace of $R_{10}L_3$

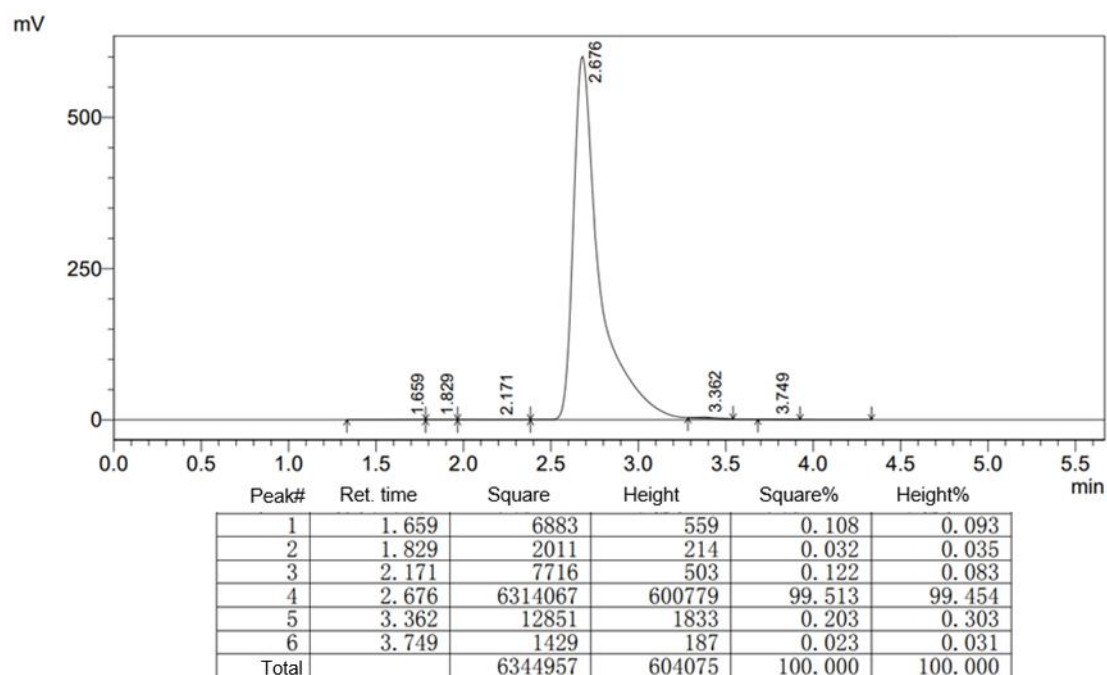

### HPLC trace of $R_{10}L_4$

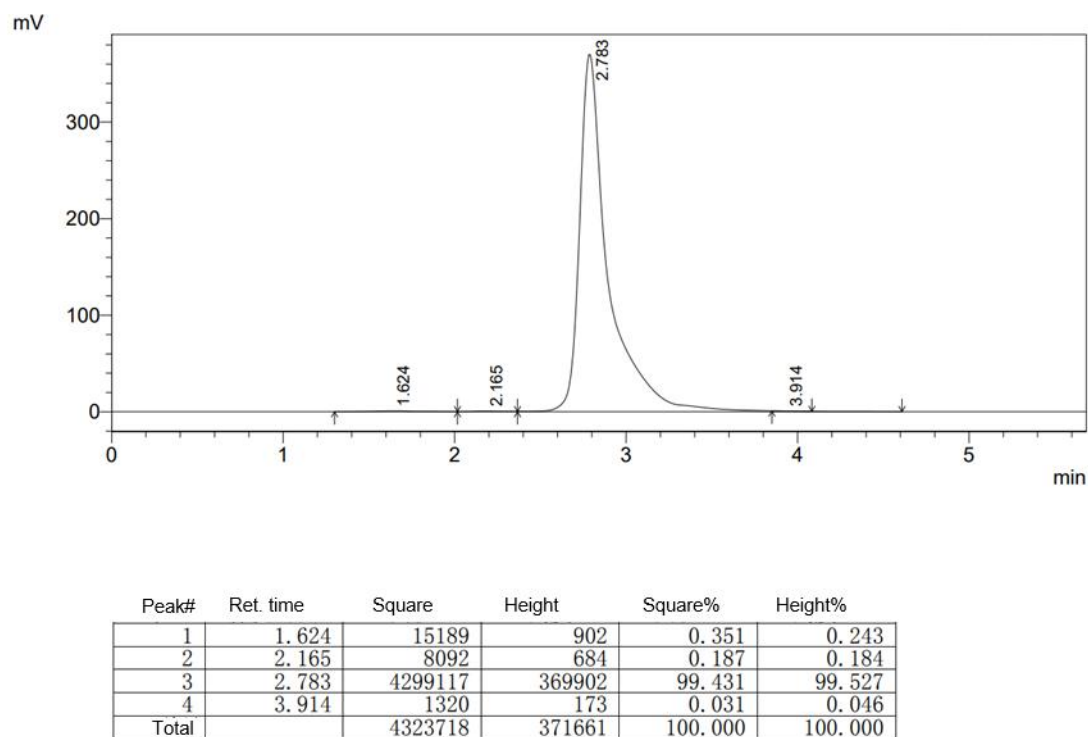

## HPLC trace of $R_{10}L_5$

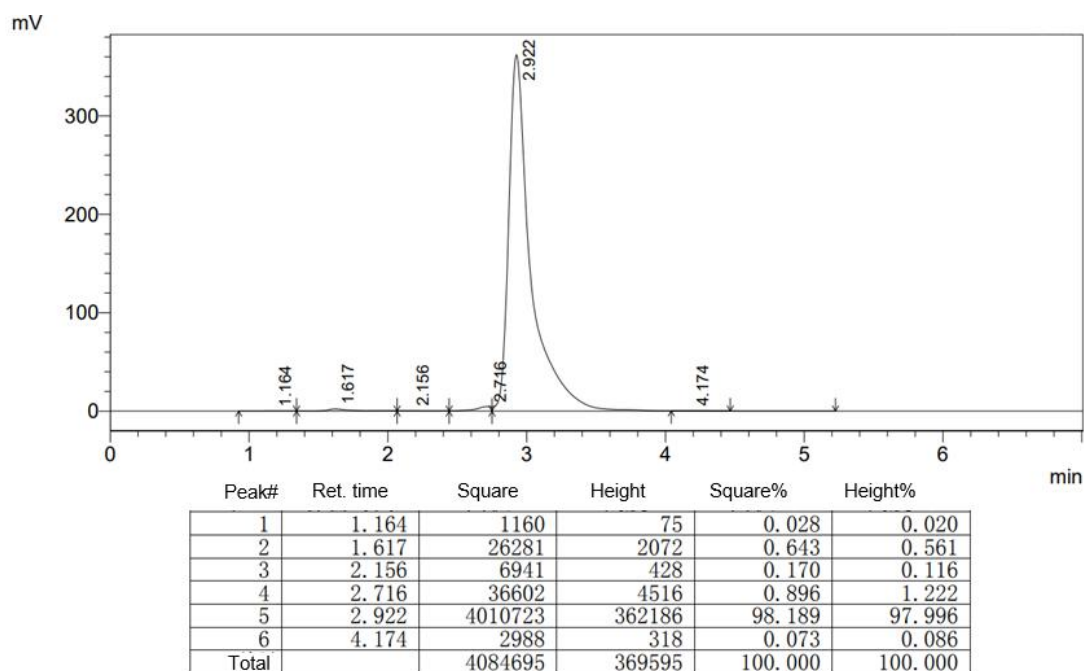

## HPLC trace of $R_{11}L_2$

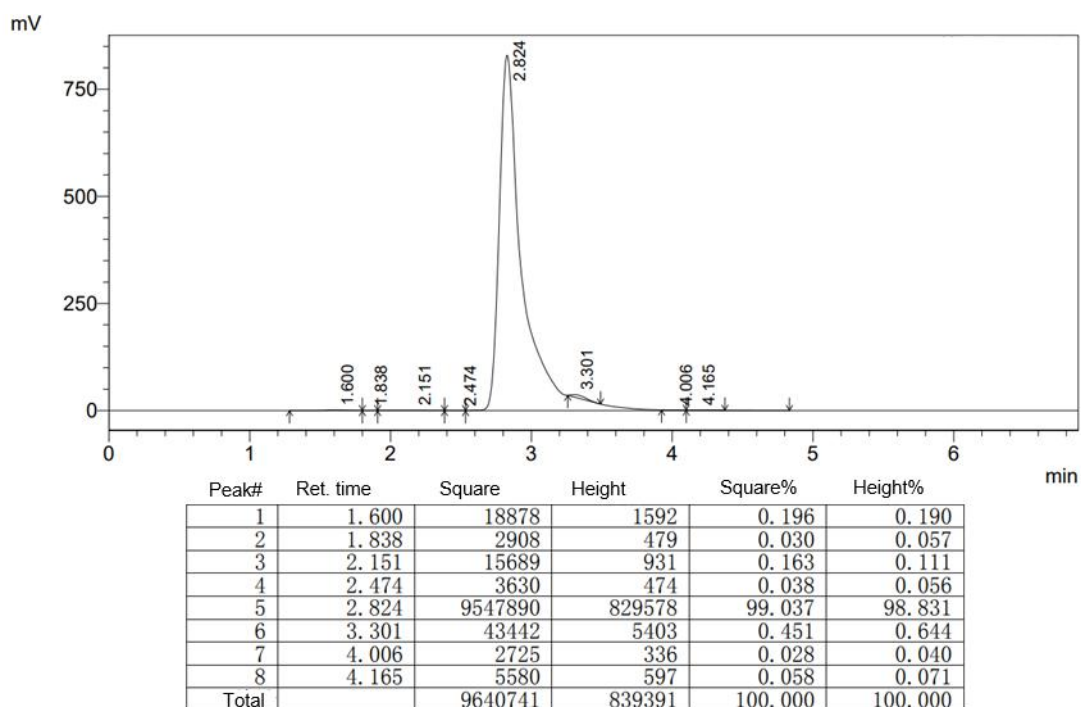

## HPLC trace of $R_{11}L_3$

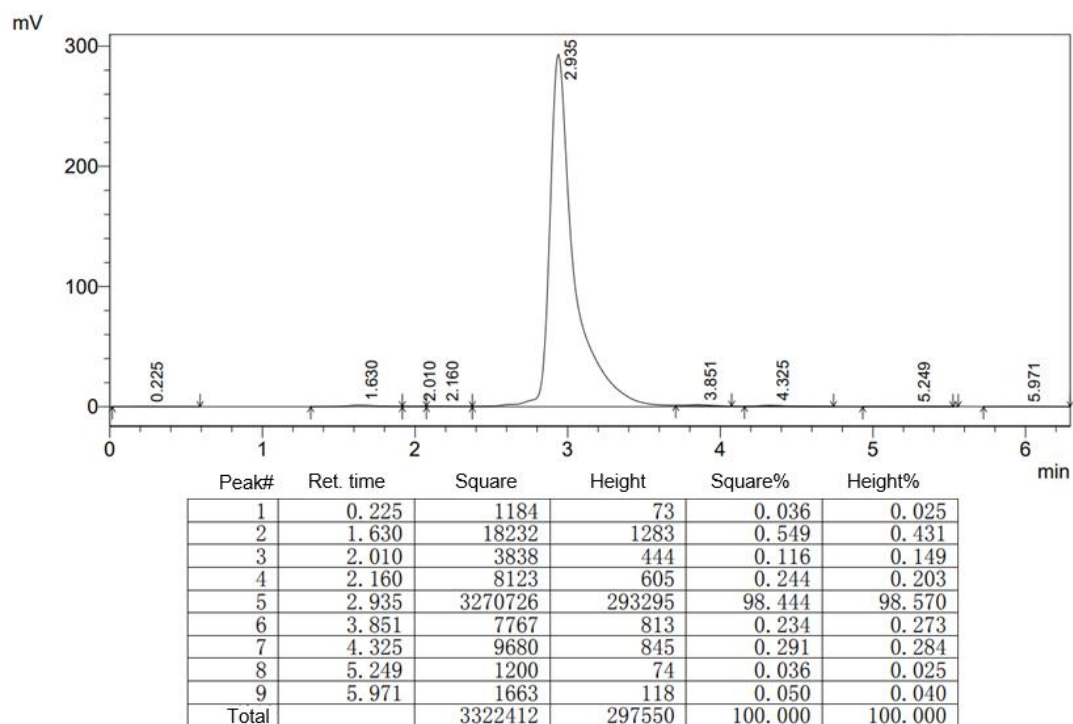

## HPLC trace of $R_{11}L_4$

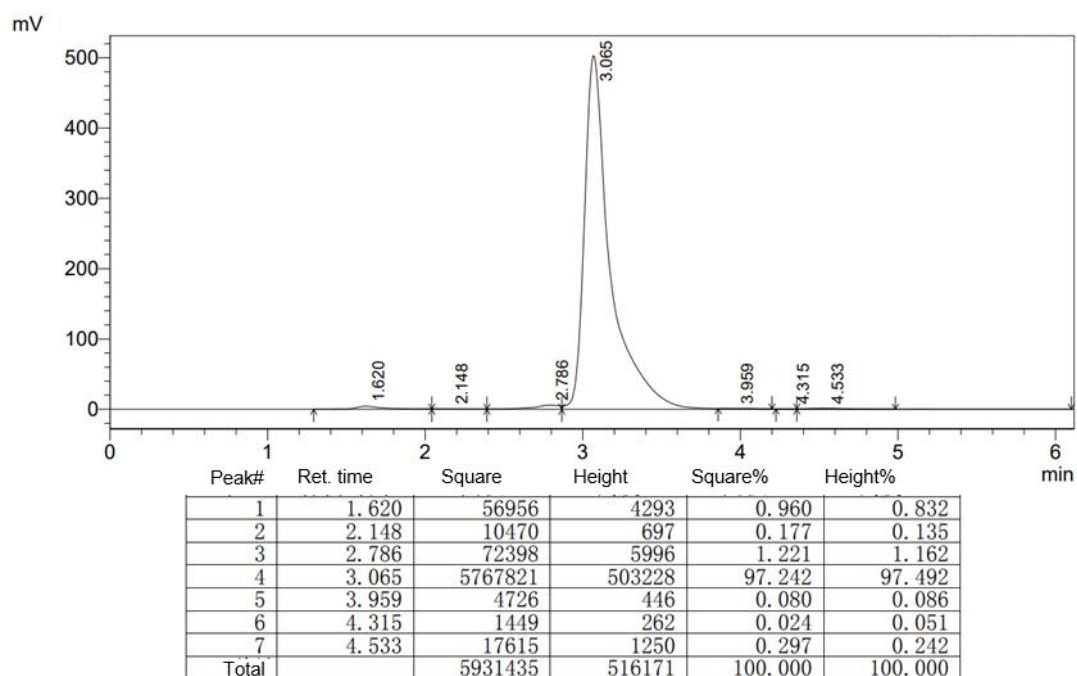

## HPLC trace of $R_{12}L_2$

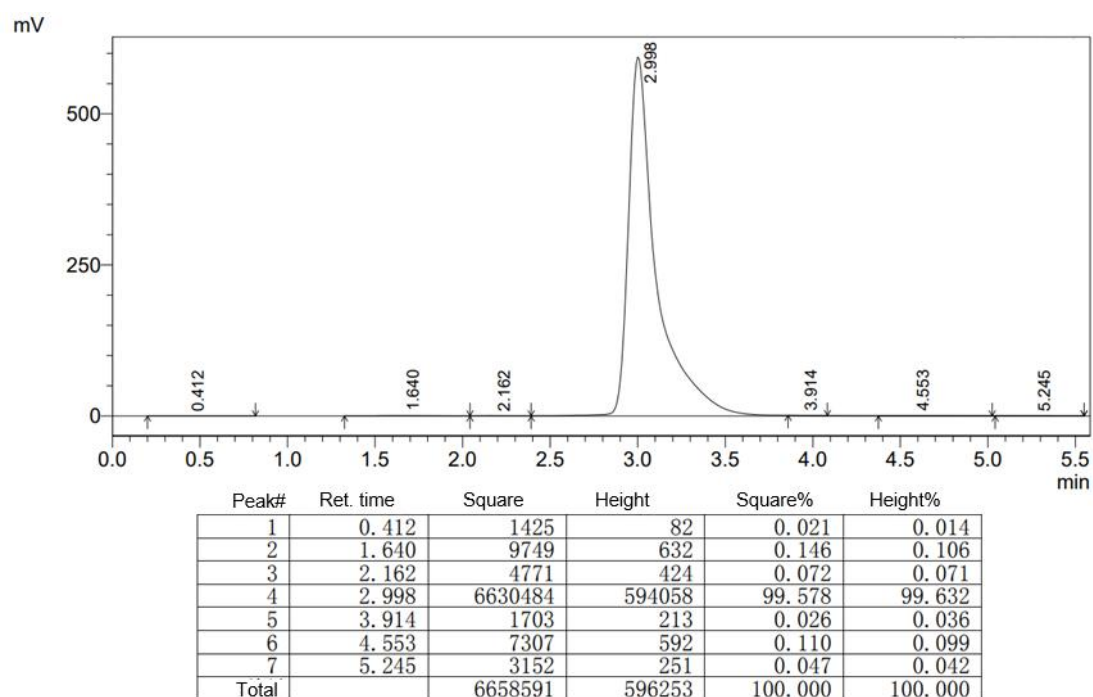

## HPLC trace of $R_{12}L_4$

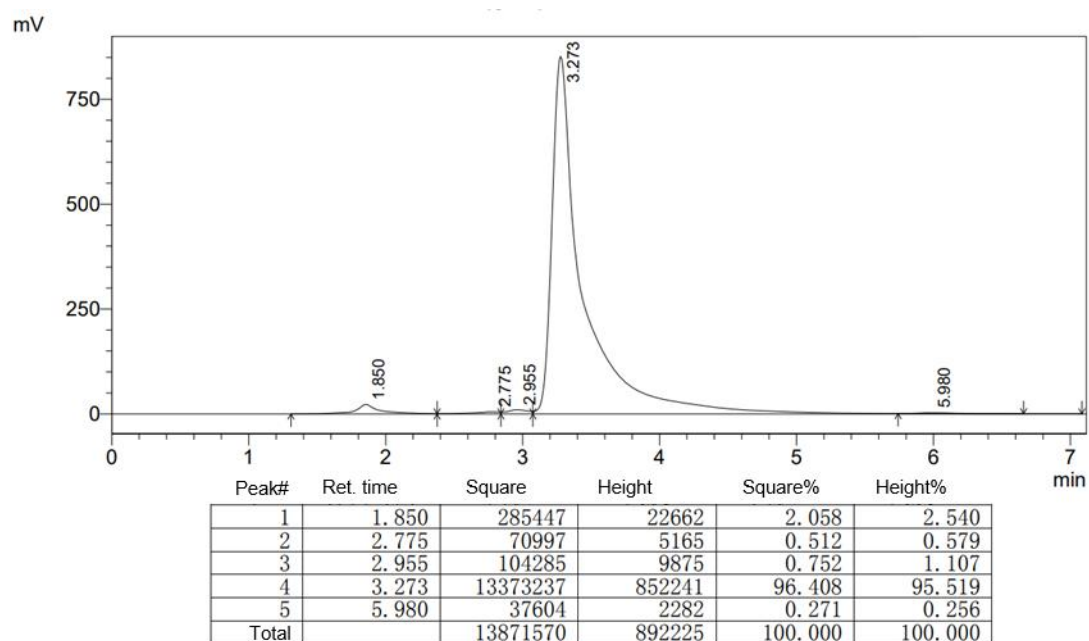

# HPLC trace of **R<sub>13</sub>L<sub>2</sub>**

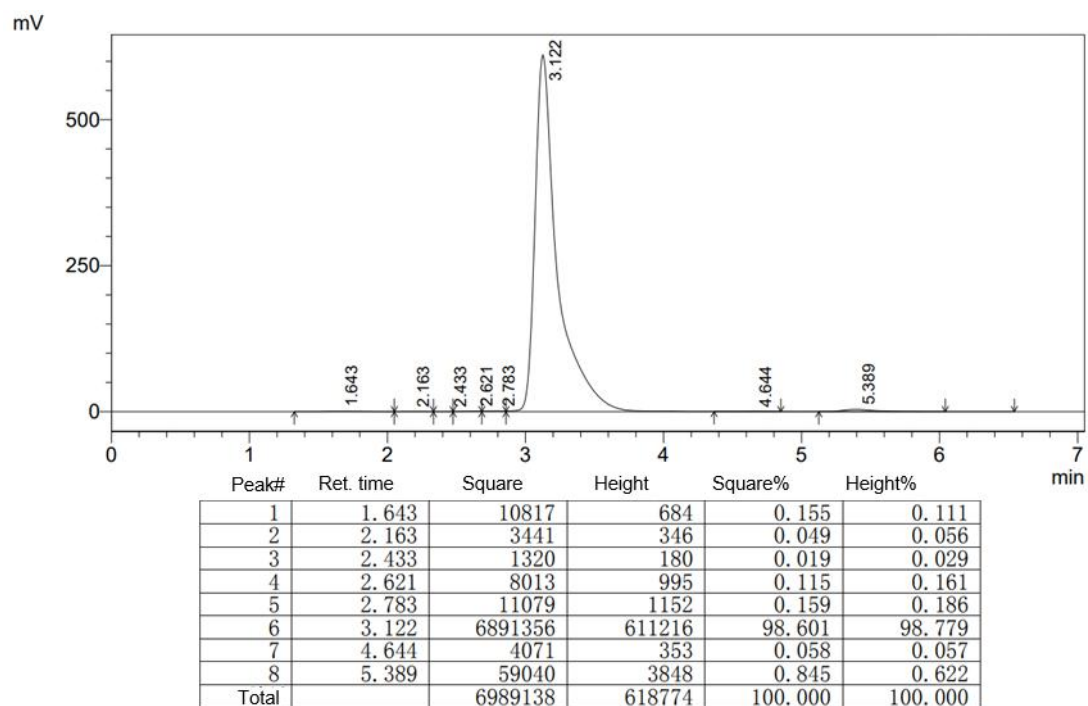

Supplement: mmc1.pdf [file mmc1.pdf]
